# Supplementary material for: Identification of Novel Genetic Variants Associated with Knee Osteoarthritis Patients of South India using Whole Exome Sequencing
Source: Research Square preprint supplement (doi:10.21203/rs.3.rs-7434154/v1), 2025-11-10
Supplement: Supplementary file 1 [file ca6bf88e56a490463a967181.xlsx]

## Sheet: Index
	Tables
	Table S1	Candidate genes list (188 genes)
	Table S2	Variants identified in candidate genes (1708 variants)
	Table S3	REACTOME pathway enrichment analysis of 188 candidate genes
	Table S4	Statistics of 7 prioritized variants

## Sheet: Table S1
Symbol	Source_of_Ref	Description	Category
ACAN	Malacards|HPO	Aggrecan	Protein Coding
ADAM10	Malacards	ADAM Metallopeptidase Domain 10	Protein Coding
ADAMTS14	Malacards	ADAM Metallopeptidase With Thrombospondin Type 1 Motif 14	Protein Coding
ADAMTS4	Malacards|Literature	ADAM Metallopeptidase With Thrombospondin Type 1 Motif 4	Protein Coding
ADAMTS5	Malacards|Literature|GWAS	ADAM Metallopeptidase With Thrombospondin Type 1 Motif 5	Protein Coding
AEBP1	HPO	Adipocyte Enhancer-Binding Protein 1| (ACLP) Aortic Carboxypeptidase-Like Protein	Protein Coding
AIP	HPO	Aryl Hydrocarbon Receptor Interacting Protein	Protein Coding
ALDH1A2	GWAS	Aldehyde Dehydrogenase 1 Family Member A2	Protein Coding
ANKH	HPO	ANKH Inorganic Pyrophosphate Transport Regulator	Protein Coding
ANKRD55	HPO	Ankyrin Repeat Domain 55	Protein Coding
ASAP1	GWAS	ArfGAP With SH3 Domain, Ankyrin Repeat And PH Domain 1	Protein Coding
ASPN	Malacards|HPO	Asporin	Protein Coding
ATP7B	HPO	ATPase Copper Transporting Beta	Protein Coding
BGLAP	Malacards	Bone Gamma-Carboxyglutamate Protein	Protein Coding
BMP2	Malacards	Bone Morphogenetic Protein 2	Protein Coding
BMP4	HPO	Bone Morphogenetic Protein 4	Protein Coding
BMP5	Malacards	Bone Morphogenetic Protein 5	Protein Coding
BMP7	Malacards	Bone Morphogenetic Protein 7	Protein Coding
BTNL2	Indian population|GWAS	Butyrophilin Like 2	Protein Coding
CALM1	GWAS	Calmodulin 1	Protein Coding
CANT1	HPO	Calcium Activated Nucleotidase 1	Protein Coding
CCL2	Malacards	C-C Motif Chemokine Ligand 2	Protein Coding
CCN6	HPO	Cellular Communication Network Factor 6	Protein Coding
CD247	HPO	CD247 Molecule	Protein Coding
CDC5L	GWAS	Cell Division Cycle 5 Like	Protein Coding
CHADL	Literature	Chondroadherin Like	Protein Coding
CHI3L1	Malacards	Chitinase 3 Like 1	Protein Coding
CILP	Malacards	Cartilage Intermediate Layer Protein	Protein Coding
CLCN7	HPO	Chloride Voltage-Gated Channel 7	Protein Coding
CLEC3B	Malacards	C-Type Lectin Domain Family 3 Member B	Protein Coding
COL10A1	Malacards|Literature	Collagen Type X Alpha 1 Chain	Protein Coding
COL11A1	HPO	Collagen Type XI Alpha 1 Chain	Protein Coding
COL11A2	Malacards|HPO	Collagen Type XI Alpha 2 Chain	Protein Coding
COL1A1	HPO	Collagen Type I Alpha 1 Chain	Protein Coding
COL2A1	Malacards|HPO	Collagen Type II Alpha 1 Chain	Protein Coding
COL3A1	HPO	Collagen Type III Alpha 1 Chain	Protein Coding
COL5A1	HPO	Collagen Type V Alpha 1 Chain	Protein Coding
COL5A2	HPO	Collagen Type V Alpha 2 Chain	Protein Coding
COL6A6	Indian population|Literature	Collagen Type VI Alpha 6 Chain	Protein Coding
COL9A1	Malacards|HPO	Collagen Type IX Alpha 1 Chain	Protein Coding
COL9A2	Malacards|HPO	Collagen Type IX Alpha 2 Chain	Protein Coding
COL9A3	Malacards|HPO	Collagen Type IX Alpha 3 Chain	Protein Coding
COLGALT2	GWAS	Collagen Beta(1-O)Galactosyltransferase 2	Protein Coding
COMP	Malacards|HPO	Cartilage Oligomeric Matrix Protein	Protein Coding
CPSF6	GWAS	Cleavage And Polyadenylation Specific Factor 6	Protein Coding
CRP	Malacards	C-Reactive Protein	Protein Coding
CSK	GWAS	C-Terminal Src Kinase	Protein Coding
CTSK	Malacards	Cathepsin K	Protein Coding
CXCL8	Malacards	C-X-C Motif Chemokine Ligand 8	Protein Coding
DCN	Malacards	Decorin	Protein Coding
DDR2	Malacards	Discoidin Domain Receptor Tyrosine Kinase 2	Protein Coding
DDRGK1	HPO	DDRGK Domain Containing 1	Protein Coding
DIO2	GWAS	Iodothyronine Deiodinase 2	Protein Coding
DVWA/COL6A4P1	GWAS	Collagen Type VI Alpha 4 Pseudogene 1	Pseudogene
EMILIN1	HPO	Elastin Microfibril Interfacer 1	Protein Coding
ESR1	GWAS	Estrogen Receptor 1	Protein Coding
F2	GWAS	Coagulation Factor II, Thrombin	Protein Coding
F8	HPO	Coagulation Factor VIII	Protein Coding
F9	HPO	Coagulation Factor IX	Protein Coding
FBN1	HPO	Fibrillin 1	Protein Coding
FGFR3	HPO	Fibroblast Growth Factor Receptor 3	Protein Coding
FIGNL1	Literature	Fidgetin Like 1	Protein Coding
FRZB	HPO|Malacards; Genetic Tests28	Frizzled Related Protein	Protein Coding
GAS5	Malacards: Experimental evidence: Regulation38	Growth Arrest Specific 5	RNA Gene
GAS6	Literature	Growth Arrest Specific 6	Protein Coding
GBA1	HPO	Glucosylceramidase Beta 1	Protein Coding
GDF5	Malacards|HPO	Growth Differentiation Factor 5	Protein Coding
GHR	HPO	Growth Hormone Receptor	Protein Coding
GLE1	Indian population|Literature	GLE1 RNA Export Mediator	Protein Coding
GNAS	HPO	GNAS Complex Locus	Protein Coding
GNL3	GWAS	G Protein Nucleolar 3	Protein Coding
GPR101	HPO	G Protein-Coupled Receptor 101	Protein Coding
H19	Malacards: Experimental evidence: Regulation38	H19 Imprinted Maternally Expressed Transcript	RNA Gene
HAPLN1	Malacards|GWAS	Hyaluronan And Proteoglycan Link Protein 1	Protein Coding
HGD	HPO	Homogentisate 1,2-Dioxygenase	Protein Coding
HLA-A	Indian population	Major Histocompatibility Complex, Class I, A	Protein Coding
HLA-B	Indian population|HPO	Major Histocompatibility Complex, Class I, B	Protein Coding
HLA-C	Indian population	Major Histocompatibility Complex, Class I, C	Protein Coding
HLA-DPB1	Indian population|GWAS	Major Histocompatibility Complex, Class II, DP Beta 1	Protein Coding
HLA-DQB1	GWAS	Major Histocompatibility Complex, Class II, DQ Beta 1	Protein Coding
HOTAIR	Malacards: Experimental evidence: Regulation38	HOX Transcript Antisense RNA	RNA Gene
HPGD	HPO	15-Hydroxyprostaglandin Dehydrogenase	Protein Coding
HSPG2	Literature	Heparan Sulfate Proteoglycan 2	Protein Coding
HTRA1	Malacards	HtrA Serine Peptidase 1	Protein Coding
IGF1	Malacards	Insulin Like Growth Factor 1	Protein Coding
IGFBP5	GWAS	Insulin Like Growth Factor Binding Protein 5	Protein Coding
IL17A	Malacards	Interleukin 17A	Protein Coding
IL1A	Malacards|GWAS	Interleukin 1 Alpha	Protein Coding
IL1B	Malacards|GWAS	Interleukin 1 Beta	Protein Coding
IL1R1	Malacards|GWAS	Interleukin 1 Receptor Type 1	Protein Coding
IL1RN	Malacards	Interleukin 1 Receptor Antagonist	Protein Coding
IL2RA	HPO	Interleukin 2 Receptor Subunit Alpha	Protein Coding
IL2RB	HPO	Interleukin 2 Receptor Subunit Beta	Protein Coding
IL4R	GWAS	Interleukin 4 Receptor	Protein Coding
IL6	Malacards|GWAS	Interleukin 6	Protein Coding
ITGA8	Literature	Integrin Subunit Alpha 8	Protein Coding
KCNJ5	Malacards: Experimental evidence: Regulation38	Potassium Inwardly Rectifying Channel Subfamily J Member 5	Protein Coding
KCNK15-AS1	Malacards: Experimental evidence: Regulation38	KCNK15 And WISP2 Antisense RNA 1	RNA Gene
KCTD13	Malacards: Experimental evidence: Regulation38	Potassium Channel Tetramerization Domain Containing 13	Protein Coding
KIF22	HPO	Kinesin Family Member 22	Protein Coding
KPNA3	GWAS	Karyopherin Subunit Alpha 3	Protein Coding
LMNA	HPO	Lamin A/C	Protein Coding
LRCH1	Malacards|GWAS	Leucine Rich Repeats And Calponin Homology Domain Containing 1	Protein Coding
LTBP3	GWAS	Latent Transforming Growth Factor Beta Binding Protein 3	Protein Coding
MAPT	GWAS	Microtubule Associated Protein Tau	Protein Coding
MATN1	Malacards	Matrilin 1	Protein Coding
MATN3	Indian population|Malacards|HPO	Matrilin 3	Protein Coding
MCF2L	Malacards	MCF.2 Cell Line Derived Transforming Sequence Like	Protein Coding
MEFV	HPO	MEFV Innate Immunity Regulator, Pyrin	Protein Coding
MEG3	Malacards: Experimental evidence: Regulation38	Maternally Expressed 3	RNA Gene
MGP	Malacards|GWAS	Matrix Gla Protein	Protein Coding
mir140	Malacards|GWAS	MicroRNA 140	RNA Gene
mir146	GWAS	MicroRNA 146	RNA Gene (miRNA)
mir199A1	Malacards	MicroRNA 199a-1	RNA Gene
mir26A2	GWAS	MicroRNA 26a-2	RNA Gene (miRNA)
mir26A5(mir26A1,MiR-26a-5p)	GWAS	MicroRNA 26a-1	RNA Gene (miRNA)
mir26B	GWAS	MicroRNA 26b	RNA Gene (miRNA)
MMP1	Malacards	Matrix Metallopeptidase 1	Protein Coding
MMP13	Malacards|HPO|GWAS	Matrix Metallopeptidase 13	Protein Coding
MMP2	Malacards|Literature	Matrix Metallopeptidase 2	Protein Coding
MMP3	Malacards|Literature	Matrix Metallopeptidase 3	Protein Coding
MMP9	Malacards|Literature	Matrix Metallopeptidase 9	Protein Coding
NACA2	Indian population|Literature	Nascent Polypeptide Associated Complex Subunit Alpha 2	Protein Coding
NCOA3	GWAS	Nuclear Receptor Coactivator 3	Protein Coding
NF1	GWAS	Neurofibromin 1	Protein Coding
OMG	GWAS	Oligodendrocyte Myelin Glycoprotein	Protein Coding
EVI2B	GWAS	Ecotropic Viral Integration Site 2B	Protein Coding
EVI2A	GWAS	Ecotropic Viral Integration Site 2A	Protein Coding
NFKB	GWAS
NGF	HPO	Nerve Growth Factor	Protein Coding
NLRP6	Literature	NLR Family Pyrin Domain Containing 6	Protein Coding
NOS2	Malacards|GWAS	Nitric Oxide Synthase 2	Protein Coding
PACERR	Malacards: Experimental evidence: Expression38	PTGS2 Antisense NFKB1 Complex-Mediated Expression Regulator RNA	RNA Gene
PCGEM1	Malacards: Experimental evidence: Regulation38	PCGEM1 Prostate-Specific Transcript	RNA Gene
PHEX	HPO	Phosphate Regulating Endopeptidase X-Linked	Protein Coding
PLEC	GWAS	Plectin	Protein Coding
PMS2P2	Malacards: Experimental evidence: Regulation38	PMS1 Homolog 2, Mismatch Repair System Component Pseudogene 2	Pseudogene
PRG4	Malacards|HPO	Proteoglycan 4	Protein Coding
PTGS1	Malacards	Prostaglandin-Endoperoxide Synthase 1	Protein Coding
PTGS2	Malacards|GWAS	Prostaglandin-Endoperoxide Synthase 2	Protein Coding
PTPN2	HPO	Protein Tyrosine Phosphatase Non-Receptor Type 2	Protein Coding
PTPN22	HPO	Protein Tyrosine Phosphatase Non-Receptor Type 22	Protein Coding
PXN	Literature	Paxillin	Protein Coding
RAPH1	GWAS	Ras Association (RalGDS/AF-6) And Pleckstrin Homology Domains 1	Protein Coding
RUNX2	Malacards|Literature	RUNX Family Transcription Factor 2	Protein Coding
RWDD2B	GWAS	RWD Domain Containing 2B	Protein Coding
SBNO1	GWAS	Strawberry Notch Homolog 1	Protein Coding
SCARB2	HPO	Scavenger Receptor Class B Member 2	Protein Coding
SELP	Indian population|Literature	Selectin P	Protein Coding
SLBP	GWAS	Stem-Loop Histone MRNA Binding Protein	Protein Coding
SLC26A2	HPO	Solute Carrier Family 26 Member 2	Protein Coding
SLC40A1	HPO	Solute Carrier Family 40 Member 1	Protein Coding
SMAD2	HPO	SMAD Family Member 2	Protein Coding
SMAD3	Malacards|HPO	SMAD Family Member 3	Protein Coding
SMAD4	GWAS	SMAD Family Member 4	Protein Coding
SNAP47	GWAS	Synaptosome Associated Protein 47	Protein Coding
SOX4	Literature	SRY-Box Transcription Factor 4	Protein Coding
SOX9	Malacards|Literature	SRY-Box Transcription Factor 9	Protein Coding
SPN	Indian population|Literature	Sialophorin	Protein Coding
STAT4	HPO	Signal Transducer And Activator Of Transcription 4	Protein Coding
STT3A	HPO	STT3 Oligosaccharyltransferase Complex Catalytic Subunit A	Protein Coding
SUSD5	Literature	Sushi Domain Containing 5	Protein Coding
TGFB1	Malacards|GWAS	Transforming Growth Factor Beta 1	Protein Coding
TGFB3	HPO	Transforming Growth Factor Beta 3	Protein Coding
TIMP1	Malacards	TIMP Metallopeptidase Inhibitor 1	Protein Coding
TLR10	Indian population|Literature	Toll Like Receptor 10	Protein Coding
TMEM241	GWAS	Transmembrane Protein 241	Protein Coding
TMSB4X	Malacards: Experimental evidence: Regulation38	Thymosin Beta 4 X-Linked	Protein Coding
TNF	Malacards|GWAS	Tumor Necrosis Factor	Protein Coding
TNFAIP6	Malacards	TNF Alpha Induced Protein 6	Protein Coding
TNFRSF11B	Malacards|HPO	TNF Receptor Superfamily Member 11b	Protein Coding
TNFSF11	Malacards	TNF Superfamily Member 11	Protein Coding
TNFα(TNF)	GWAS	Tumor Necrosis Factor	Protein Coding
TNFβ(LTA)	GWAS	Lymphotoxin Alpha	Protein Coding
TNRC6B	Literature	Trinucleotide Repeat Containing Adaptor 6B	Protein Coding
TRAPPC2	HPO	Trafficking Protein Particle Complex Subunit 2	Protein Coding
TRPS1	HPO	Transcriptional Repressor GATA Binding 1	Protein Coding
TRPV4	HPO	Transient Receptor Potential Cation Channel Subfamily V Member 4	Protein Coding
u6(RNU6-1)	GWAS	RNA, U6 Small Nuclear 1	RNA Gene (snRNA)
UCMA	Malacards	Upper Zone Of Growth Plate And Cartilage Matrix Associated	Protein Coding
UFC1	Malacards: Experimental evidence: Regulation38	Ubiquitin-Fold Modifier Conjugating Enzyme 1	Protein Coding
UFSP2	HPO	UFM1 Specific Peptidase 2	Protein Coding
USP36	Literature	Ubiquitin Specific Peptidase 36	Protein Coding
VDR	GWAS	Vitamin D Receptor	Protein Coding
WNT9A	GWAS	Wnt Family Member 9A	Protein Coding
WWP2	GWAS	WW Domain Containing E3 Ubiquitin Protein Ligase 2	Protein Coding
ZMPSTE24	HPO	Zinc Metallopeptidase STE24	Protein Coding
ZNF687	HPO	Zinc Finger Protein 687	Protein Coding

## Sheet: Table S2
chr	pos	ref	alt	effect	dbsnp	gene_symbol	gnomad_exomes_af	acmg_classification	clinvar_classification
chr1	21823442	T	C	synonymous_variant	rs897467	HSPG2	0.819724	Benign	Benign
chr1	21823625	C	T	missense_variant	rs1138469	HSPG2	0.0614114	Benign	Benign
chr1	21823627	C	T	missense_variant	rs3736360	HSPG2	0.185157	Benign	Benign
chr1	21823667	G	T	synonymous_variant	rs3736358	HSPG2	0.18414	Benign	Benign
chr1	21827894	G	A	synonymous_variant	rs11552570	HSPG2	0.0505668	Benign	Benign
chr1	21828352	A	G	synonymous_variant	rs2228347	HSPG2	0.312269	Benign	Benign
chr1	21828860	G	A	missense_variant	rs74859884	HSPG2	0.0364039	Benign	Benign
chr1	21829548	C	T	missense_variant	rs116630187	HSPG2	0.00141308	Benign	Conflicting classifications of pathogenicity
chr1	21831052	G	A	synonymous_variant	rs112494360	HSPG2	0.050658	Benign	Benign
chr1	21831664	A	G	synonymous_variant	rs2229488	HSPG2	0.0826906	Benign	Benign
chr1	21832515	C	A	synonymous_variant	rs2229487	HSPG2	0.176829	Benign	Benign
chr1	21833281	G	A	synonymous_variant	rs2229486	HSPG2	0.0825213	Benign	Benign
chr1	21833291	G	A	missense_variant	rs149159881	HSPG2	0.000805846	Benign	Conflicting classifications of pathogenicity
chr1	21833550	C	T	missense_variant	rs2229493	HSPG2	0.0826223	Benign	Benign
chr1	21834782	G	A	synonymous_variant	rs2229492	HSPG2	0.177881	Benign	Benign
chr1	21836897	G	A	synonymous_variant	rs35444472	HSPG2	0.0826582	Benign	Benign
chr1	21836909	G	A	synonymous_variant	rs41310390	HSPG2	0.061447	Benign	Benign/Likely benign
chr1	21836953	C	T	missense_variant	rs150666616	HSPG2	0.000214485	Benign	Conflicting classifications of pathogenicity
chr1	21839408	A	G	synonymous_variant	rs2291826	HSPG2	0.277774	Benign	Benign
chr1	21839494	G	A	missense_variant	rs2291827	HSPG2	0.176946	Benign	Benign
chr1	21841112	C	T	missense_variant	rs2228349	HSPG2	0.0823562	Benign	Benign
chr1	21842308	T	C	missense_variant	rs2229491	HSPG2	0.0828171	Benign	Benign
chr1	21842352	A	T	missense_variant	rs2229489	HSPG2	0.0581388	Benign	Benign
chr1	21842362	G	A	missense_variant	rs114851469	HSPG2	0.0112063	Benign	Benign/Likely benign
chr1	21848025	G	T	synonymous_variant	rs12737091	HSPG2	0.0581627	Benign	Benign
chr1	21850164	G	A	synonymous_variant	rs757527255	HSPG2	5.4756e-06	Likely_benign
chr1	21851608	C	T	missense_variant	rs140476180	HSPG2	0.000350958	Benign	Benign/Likely benign
chr1	21852751	C	T	missense_variant	rs35669711	HSPG2	0.0581576	Benign	Benign
chr1	21852958	C	T	synonymous_variant	rs34443576	HSPG2	0.0581867	Benign	Benign
chr1	21854230	C	T	synonymous_variant	rs12742444	HSPG2	0.0578768	Benign	Benign
chr1	21854876	C	T	synonymous_variant	rs371397998	HSPG2	0.000472698	Benign	Benign/Likely benign
chr1	21855402	C	T	missense_variant	rs2229475	HSPG2	0.057959	Benign	Benign
chr1	21857167	C	T	missense_variant	rs561392976	HSPG2	0.000101924	Likely_benign	Uncertain significance
chr1	21864961	G	A	missense_variant	rs897471	HSPG2	0.718303	Benign	Benign
chr1	21870843	C	T	intron_variant	rs3767139	HSPG2	0.221415	Benign
chr1	21872752	C	T	synonymous_variant	rs2229482	HSPG2	0.601753	Benign	Benign
chr1	21875892	G	A	missense_variant	rs544172715	HSPG2	0.000171028	Benign	Conflicting classifications of pathogenicity
chr1	21880156	T	C	missense_variant	rs989994	HSPG2	0.994001	Benign	Benign
chr1	21880449	G	A	synonymous_variant	rs1874793	HSPG2	0.994011	Benign	Benign
chr1	21880742	T	C	missense_variant	rs1874792	HSPG2	0.997703	Benign	Benign
chr1	21881437	C	G	missense_variant	rs763276473	HSPG2	6.15808e-06	Uncertain_significance
chr1	21884633	C	T	missense_variant	rs139719757	HSPG2	0.000451013	Benign	Benign/Likely benign
chr1	21885130	C	T	missense_variant	rs140621959	HSPG2	0.0026365	Benign	Benign/Likely benign
chr1	21887542	G	C	missense_variant	rs543074067	HSPG2	0.000139555	Benign
chr1	21887543	A	T	missense_variant	rs561412593	HSPG2	0.000139555	Benign
chr1	21887626	G	A	missense_variant	rs566315843	HSPG2	0.000169664	Benign	Benign/Likely benign
chr1	21887634	A	G	synonymous_variant	rs2229478	HSPG2	0.358707	Benign	Benign
chr1	21890081	C	A	synonymous_variant	rs2254358	HSPG2	0.639638	Benign	Benign
chr1	21890111	C	G	synonymous_variant	rs2254357	HSPG2	0.63984	Benign	Benign
chr1	21890615	G	A	synonymous_variant	rs2501260	HSPG2	0.995649	Benign	Benign
chr1	21898384	C	G	intron_variant	rs76305492	HSPG2		Benign
chr1	21899250	G	C	intron_variant	rs2445142	HSPG2		Benign
chr1	21900598	T	C	intron_variant	rs878949	HSPG2		Benign
chr1	30713625	G	C	missense_variant	rs754556650	MATN1	5.06741e-05	Likely_benign
chr1	30715242	C	T	synonymous_variant	rs1065755	MATN1	0.347226	Benign
chr1	30716054	A	G	synonymous_variant	rs20566	MATN1	0.48457	Benign
chr1	40262857	TA	T	intron_variant	rs3841778	ZMPSTE24	0.444853	Benign
chr1	40271917	T	C	synonymous_variant	rs2076697	ZMPSTE24	0.084989	Benign	Benign
chr1	40290993	A	G	missense_variant	rs765150001	ZMPSTE24	1.71041e-05	Likely_benign
chr1	40301251	G	A	synonymous_variant	rs2229826	COL9A2	0.0239763	Benign	Benign
chr1	40302672	C	T	missense_variant	rs3737821	COL9A2	0.0257129	Benign	Benign
chr1	40304817	G	T	missense_variant	rs554648154	COL9A2	3.21757e-05	Likely_benign	Conflicting classifications of pathogenicity
chr1	40305760	C	T	synonymous_variant	rs6676013	COL9A2	0.0113052	Benign	Benign
chr1	40307451	G	C	missense_variant	rs2228567	COL9A2	0.121472	Benign	Benign
chr1	40307477	T	C	missense_variant	rs2228564	COL9A2	0.248609	Benign	Benign
chr1	40307478	G	A	stop_gained	rs12077871	COL9A2	0.0114993	Benign	Benign/Likely benign
chr1	40310265	G	A	missense_variant,splice_region_variant	rs2228565	COL9A2	0.0331282	Benign	Benign
chr1	40312128	T	G	intron_variant	rs1979785	COL9A2	0.248846	Benign	Benign
chr1	102886895	A	G	synonymous_variant	rs2229783	COL11A1	0.599604	Benign	Benign
chr1	102888579	G	C	missense_variant	rs139064549	COL11A1	0.0131787	Benign	Benign/Likely benign
chr1	102888582	A	G	missense_variant	rs1676486	COL11A1	0.800675	Benign	Benign
chr1	102888872	A	G	synonymous_variant	rs1763347	COL11A1	0.755887	Benign	Benign
chr1	102890516	CA	C	intron_variant	rs35232764	COL11A1	0.0940225	Benign	Benign
chr1	102914362	G	A	missense_variant	rs3753841	COL11A1	0.606307	Benign	Benign
chr1	102914823	T	TA	intron_variant	rs34228277	COL11A1	0.480868	Benign	Benign
chr1	102914823	T	TAA	intron_variant	rs34228277	COL11A1	0.0822438	Benign	Conflicting classifications of pathogenicity
chr1	102940336	G	A	synonymous_variant	rs17127270	COL11A1	0.161692	Benign	Benign
chr1	102998344	C	T	missense_variant		COL11A1		Likely_pathogenic
chr1	103004635	T	C	synonymous_variant	rs111841420	COL11A1	0.0223633	Benign	Benign
chr1	103005900	CCAT	C	intron_variant	rs71752747	COL11A1	0.769983	Benign	Benign/Likely benign
chr1	103005900	CCATCAT	C	intron_variant	rs71752747	COL11A1	0.00677149	Benign	Benign
chr1	103006282	T	C	missense_variant	rs560019202	COL11A1	0.000186595	Benign	Benign/Likely benign
chr1	103025590	T	C	synonymous_variant	rs534711652	COL11A1	3.42128e-06	Likely_benign	Benign
chr1	103025905	T	G	intron_variant	rs12731843	COL11A1	0.0638463	Benign	Benign
chr1	103031236	A	G	synonymous_variant	rs71664966	COL11A1	0.063525	Benign	Benign
chr1	103031249	G	GA	splice_region_variant,intron_variant	rs36076089	COL11A1	0.0429589	Benign	Conflicting classifications of pathogenicity
chr1	103031249	G	GAA	splice_region_variant,intron_variant	rs36076089	COL11A1	0.00201734	Likely_benign	Conflicting classifications of pathogenicity
chr1	103031249	G	GAAA	splice_region_variant,intron_variant	rs36076089	COL11A1	0.0168185	Benign	Benign
chr1	103031249	GA	G	splice_region_variant,intron_variant	rs36076089	COL11A1	0.546745	Benign	Benign
chr1	103031249	GA	GAA	splice_region_variant,intron_variant	rs36076089	COL11A1	0.0429589	Benign	Conflicting classifications of pathogenicity
chr1	103031249	GA	GAAA	splice_region_variant,intron_variant	rs36076089	COL11A1	0.00201734	Likely_benign	Conflicting classifications of pathogenicity
chr1	103031249	GA	GAAAA	splice_region_variant,intron_variant	rs36076089	COL11A1	0.0168185	Benign	Benign
chr1	103031249	GAA	G	splice_region_variant,intron_variant	rs36076089	COL11A1	0.009947	Benign	Benign
chr1	103082941	A	C	missense_variant	rs11164663	COL11A1	0.074972	Benign	Benign
chr1	113825142	T	C	missense_variant,splice_region_variant	rs775926544	PTPN22	2.73253e-05	Uncertain_significance
chr1	113834946	A	G	missense_variant	rs2476601	PTPN22	0.911187	Benign
chr1	113837886	G	C	missense_variant	rs570783720	PTPN22	0.00129222	Benign	Benign
chr1	115286623	G	A	missense_variant	rs201861727	NGF	0.000518512	Benign	Benign/Likely benign
chr1	115286692	G	A	missense_variant	rs6330	NGF	0.422773	Benign	Benign
chr1	115295088	A	G	intron_variant	rs2239622	NGF		Benign
chr1	150799227	T	C	synonymous_variant	rs10788796	CTSK	0.995317	Benign	Benign
chr1	150807279	C	T	intron_variant	rs6587522	CTSK	0.997594	Benign
chr1	150808303	C	T	upstream_gene_variant	rs587638612	CTSK	0	Uncertain_significance	Uncertain significance
chr1	151286567	C	T	synonymous_variant	rs2298265	ZNF687	0.112764	Benign	Benign
chr1	151286943	T	C	synonymous_variant	rs61744826	ZNF687	0.00144584	Benign	Benign
chr1	151287067	G	A	missense_variant	rs3748545	ZNF687	0.113331	Benign	Benign
chr1	151288197	G	A	missense_variant	rs12745008	ZNF687	0.0360108	Benign	Benign
chr1	151291201	G	GACA	conservative_inframe_insertion	rs145032688	ZNF687	0.061993	Benign	Benign
chr1	155236376	C	T	missense_variant	rs2230288	GBA1	0.012541	Benign	risk factor,Conflicting classifications of pathogenicity
chr1	155238269	C	T	missense_variant	rs749416070	GBA1	4.12763e-05	Uncertain_significance
chr1	156129878	T	G	intron_variant	rs513043	LMNA	0.0904241	Benign	Benign
chr1	156134501	G	A	synonymous_variant	rs12117552	LMNA	0.00878705	Benign	Benign/Likely benign
chr1	156135237	T	C	synonymous_variant	rs538089	LMNA	0.0813645	Benign	Benign
chr1	156136394	T	C	synonymous_variant	rs505058	LMNA	0.0864559	Benign	Benign
chr1	156137743	C	T	splice_region_variant,synonymous_variant	rs4641	LMNA	0.263124	Benign	Benign
chr1	156243132	G	A	synonymous_variant		BGLAP		Likely_benign
chr1	159712443	C	T	3_prime_UTR_variant	rs1205	CRP	0.344504	Benign	Uncertain significance
chr1	159713301	G	A	3_prime_UTR_variant	rs1130864	CRP	0.278656	Benign
chr1	159713648	C	G	synonymous_variant	rs1800947	CRP	0.0577373	Benign
chr1	159714396	T	A	intron_variant	rs1417938	CRP	0.296416	Benign
chr1	161191082	T	C	3_prime_UTR_variant	rs34884997	ADAMTS4	0.149592	Benign	Benign
chr1	161191494	G	C	missense_variant	rs41270041	ADAMTS4	0.0849214	Benign
chr1	161193247	T	C	missense_variant	rs4233367	ADAMTS4	0.626682	Benign
chr1	161193649	T	C	missense_variant	rs150093855	ADAMTS4	0.00361272	Benign
chr1	161196548	G	C	intron_variant	rs143383079	ADAMTS4	0.0156591	Benign
chr1	161198199	G	A	synonymous_variant	rs12740751	ADAMTS4	0.023559	Benign
chr1	161198214	C	T	synonymous_variant	rs33941127	ADAMTS4	0.236893	Benign
chr1	161198399	C	T	missense_variant	rs34448954	ADAMTS4	0.0963123	Benign
chr1	162767326	C	G	synonymous_variant	rs2298258	DDR2	0.177463	Benign	Benign
chr1	162770523	T	C	intron_variant	rs77385055	DDR2	0.00454956	Benign	Benign/Likely benign
chr1	162770537	T	C	intron_variant	rs1780003	DDR2	0.995227	Benign	Benign
chr1	162780240	C	T	synonymous_variant	rs368082815	DDR2	0.000186773	Benign	Benign
chr1	162780420	CT	C	3_prime_UTR_variant	rs5778295	DDR2	0.198436	Benign	Conflicting classifications of pathogenicity
chr1	162780420	CTT	C	3_prime_UTR_variant	rs5778295	DDR2	0.617107	Benign	Benign
chr1	162780420	CTT	CT	3_prime_UTR_variant	rs5778295	DDR2	0.198436	Benign	Conflicting classifications of pathogenicity
chr1	162780420	CTTT	C	3_prime_UTR_variant	rs5778295	DDR2	0.141408	Benign
chr1	162780420	CTTT	CT	3_prime_UTR_variant	rs5778295	DDR2	0.617107	Benign	Benign
chr1	162780420	CTTTT	C	3_prime_UTR_variant	rs5778295	DDR2	0.00279888	Uncertain_significance
chr1	169590198	G	A	synonymous_variant	rs555055238	SELP	0.000126019	Benign
chr1	169593666	C	T	synonymous_variant	rs6128	SELP	0.185166	Benign	Benign
chr1	169596108	C	A	missense_variant	rs6133	SELP	0.119172	Benign	Benign
chr1	169597070	G	A	synonymous_variant	rs6132	SELP	0.117416	Benign	Benign
chr1	169597075	C	T	missense_variant	rs6127	SELP	0.585856	Benign	Benign
chr1	169597088	G	A	synonymous_variant	rs6135	SELP	0.117431	Benign	Benign
chr1	169609551	C	T	missense_variant	rs201496591	SELP	0.000324948	Benign
chr1	169609616	C	G	missense_variant	rs541294191	SELP	0.000620471	Benign
chr1	169611647	C	T	missense_variant	rs6131	SELP	0.183516	Benign	Benign
chr1	169613079	C	T	missense_variant	rs6125	SELP	0.0553103	Benign
chr1	183940583	G	A	splice_region_variant,synonymous_variant	rs2296713	COLGALT2	0.194452	Benign
chr1	183951057	T	G	synonymous_variant	rs16861794	COLGALT2	0.0303549	Benign
chr1	183963994	C	G	missense_variant	rs549461092	COLGALT2	2.53223e-05	Uncertain_significance	Uncertain significance
chr1	186304862	C	T	missense_variant	rs2273779	PRG4	0.325793	Benign	Benign
chr1	186306328	CAAG	C	disruptive_inframe_deletion	rs139300692	PRG4	0.0233572	Benign
chr1	186306432	C	T	missense_variant	rs12128607	PRG4	0.0455565	Benign	Benign
chr1	186306628	G	A	synonymous_variant	rs16825150	PRG4	0.163449	Benign
chr1	186307122	C	A	missense_variant	rs200941526	PRG4	0.000502705	Benign
chr1	186307135	GGAGCCTGCACCCACCACTCCCAAA	G	disruptive_inframe_deletion	rs770844232	PRG4	0.168146	Likely_benign	Benign
chr1	186307529	A	G	missense_variant	rs61831150	PRG4	0.326649	Benign	Benign
chr1	186308395	T	C	synonymous_variant	rs75928540	PRG4	0.0148963	Benign
chr1	186308660	C	T	missense_variant	rs371459140	PRG4	0.000630921	Benign	Benign
chr1	186308857	A	G	synonymous_variant	rs3737940	PRG4	0.324669	Benign	Benign
chr1	186309050	C	T	missense_variant	rs201472102	PRG4	0.000398205	Benign	Likely benign
chr1	186312268	C	T	missense_variant	rs12134934	PRG4	0.0466018	Benign	Benign
chr1	186673926	A	G	3_prime_UTR_variant	rs5275	PTGS2	0.346995	Benign	other
chr1	186674636	A	G	missense_variant	rs5273	PTGS2	0.00338945	Benign
chr1	186677683	C	T	missense_variant	rs141500962	PTGS2	2.87568e-05	Likely_benign
chr1	186679065	C	G	synonymous_variant	rs5277	PTGS2	0.142776	Benign
chr1	186681189	C	G	non_coding_transcript_exon_variant	rs20417	PACERR	0.125	Benign	other
chr1	203179505	A	G	synonymous_variant	rs4950927	CHI3L1	0.998024	Benign
chr1	203183673	T	C	missense_variant	rs880633	CHI3L1	0.497824	Benign
chr1	203186754	G	C	upstream_gene_variant	rs4950928	CHI3L1	0.794929	Benign	risk factor
chr1	227735380	G	A	5_prime_UTR_variant	rs7419238	SNAP47	0.999792	Benign
chr1	227735426	G	A	missense_variant	rs148036666	SNAP47	0.0101264	Benign
chr1	227735494	C	T	5_prime_UTR_variant	rs114487068	SNAP47	0.00404093	Benign
chr1	227747743	A	G	missense_variant	rs2236359	SNAP47	0.408838	Benign
chr1	227748061	G	A	missense_variant	rs2236358	SNAP47	0.0648591	Benign
chr1	227759115	A	G	synonymous_variant	rs140543368	SNAP47	0.0032944	Benign
chr1	227766976	C	T	missense_variant	rs17851681	SNAP47	0.101547	Benign
chr1	227775790	G	T	intron_variant	rs754224	SNAP47	0.168432	Benign
chr1	227921698	C	T	synonymous_variant	rs141731322	WNT9A	0.00031223	Benign
chr1	227921770	C	T	synonymous_variant	rs8192633	WNT9A	0.0214255	Benign
chr1	227924333	C	T	synonymous_variant	rs8192630	WNT9A	0.0112415	Benign	Benign
chr1	227925345	C	T	synonymous_variant	rs8192629	WNT9A	0.100164	Benign
chr1	227925462	A	G	synonymous_variant	rs3795768	WNT9A	0.692882	Benign
chr10	6025886	T	C	synonymous_variant	rs563759672	IL2RA	3.14661e-05	Benign	Likely benign
chr10	6026006	C	T	synonymous_variant	rs2228150	IL2RA	0.0340208	Benign	Benign
chr10	13233553	T	G	synonymous_variant	rs3829925	UCMA	0.895174	Benign
chr10	15517200	G	T	synonymous_variant	rs199977895	ITGA8	0.000763028	Benign	Benign
chr10	15531051	A	G	missense_variant,splice_region_variant	rs1041135	ITGA8	0.99011	Benign	Benign
chr10	15572232	A	G	synonymous_variant	rs369447612	ITGA8	0.000257941	Benign	Likely benign
chr10	15604226	T	C	synonymous_variant	rs9333166	ITGA8	0.00217907	Benign	Benign
chr10	15607711	G	A	missense_variant	rs2298033	ITGA8	0.0215462	Benign	Benign
chr10	15607817	C	A	missense_variant	rs564126132	ITGA8	6.15998e-05	Likely_benign	Uncertain significance
chr10	15613758	C	T	synonymous_variant	rs200613964	ITGA8	0.000284857	Benign	Benign
chr10	15684089	C	T	synonymous_variant	rs72781816	ITGA8	0.00939697	Benign	Benign/Likely benign
chr10	15687977	C	G	missense_variant	rs554278300	ITGA8	0.000203214	Benign	Likely benign
chr10	15719771	TCTCC	T	start_retained_variant	rs11575600	ITGA8	0.162657	Benign
chr10	70708778	C	A	splice_region_variant,synonymous_variant	rs145552242	ADAMTS14	0.000119806	Likely_benign
chr10	70738952	C	T	synonymous_variant	rs564750212	ADAMTS14	0.000273767	Benign
chr10	70741007	T	C	missense_variant	rs10823607	ADAMTS14	0.859981	Benign
chr10	70741069	G	A	missense_variant	rs546049764	ADAMTS14	1.16298e-05	Uncertain_significance
chr10	70741107	C	G	synonymous_variant	rs10999500	ADAMTS14	0.608771	Benign
chr10	70741157	A	G	missense_variant		ADAMTS14		Uncertain_significance
chr10	70743588	G	A	synonymous_variant	rs10999502	ADAMTS14	0.244279	Benign
chr10	70745452	A	G	intron_variant	rs7907248	ADAMTS14	0.270322	Benign
chr10	70749921	C	T	missense_variant	rs375472897	ADAMTS14	0.00349966	Benign
chr10	70751621	C	T	synonymous_variant	rs548398740	ADAMTS14	7.12777e-05	Likely_benign
chr10	70753879	C	A	missense_variant	rs12774070	ADAMTS14	0.25754	Benign
chr10	70753926	C	T	synonymous_variant	rs2587475	ADAMTS14	0.556447	Benign
chr10	70758074	G	A	missense_variant	rs10999516	ADAMTS14	0.178895	Benign
chr10	70758081	C	T	synonymous_variant	rs6480463	ADAMTS14	0.572078	Benign
chr10	70758253	A	G	missense_variant	rs4747096	ADAMTS14	0.179277	Benign	Benign
chr10	70760503	C	T	missense_variant	rs61573157	ADAMTS14	0.0950605	Benign
chr10	70760574	A	G	synonymous_variant	rs10823615	ADAMTS14	0.353629	Benign
chr10	70760811	A	G	synonymous_variant	rs10823616	ADAMTS14	0.229171	Benign
chr10	122461754	C	T	synonymous_variant	rs1049331	HTRA1	0.226319	Benign	Benign/Likely benign
chr10	122461760	G	C	synonymous_variant	rs2293870	HTRA1	0.136356	Benign	Benign/Likely benign
chr10	122461760	G	T	synonymous_variant	rs2293870	HTRA1	0.226873	Benign	Benign/Likely benign
chr10	122461974	G	T	missense_variant		HTRA1	7.35686e-07	Uncertain_significance
chr10	122489602	C	T	synonymous_variant	rs17624021	HTRA1	0.0506389	Benign	Benign
chr10	122511998	C	T	missense_variant	rs147459330	HTRA1	0.000216182	Benign	Likely benign
chr11	280221	A	C	missense_variant	rs6421985	NLRP6	0.852601	Benign
chr11	280464	C	G	missense_variant	rs77447196	NLRP6	0.199978	Benign
chr11	280673	C	T	synonymous_variant	rs12807092	NLRP6	0.771356	Benign
chr11	280816	A	T	missense_variant	rs7482965	NLRP6	0.852884	Benign
chr11	280817	T	C	synonymous_variant	rs7482279	NLRP6	0.852885	Benign
chr11	284257	G	A	synonymous_variant	rs11246050	NLRP6	0.164983	Benign
chr11	284341	G	A	synonymous_variant	rs7108246	NLRP6	0.059819	Benign
chr11	284538	T	C	synonymous_variant	rs6598047	NLRP6	0.714347	Benign
chr11	284562	C	T	synonymous_variant	rs374720428	NLRP6	8.21809e-06	Likely_benign
chr11	285188	G	A	missense_variant	rs138624921	NLRP6	0.000387336	Benign
chr11	285256	G	A	synonymous_variant	rs144727560	NLRP6	0.000503544	Benign
chr11	46723453	C	T	missense_variant	rs5896	F2	0.160996	Benign	Benign/Likely benign
chr11	46726097	C	T	synonymous_variant	rs138260543	F2	0.000382386	Benign	Conflicting classifications of pathogenicity
chr11	46726112	C	T	synonymous_variant	rs5899	F2	0.00971992	Benign	Conflicting classifications of pathogenicity
chr11	46726186	G	A	intron_variant	rs764029414	F2	7.53421e-06	Likely_benign	Uncertain significance
chr11	46728098	G	A	synonymous_variant	rs5898	F2	0.0799912	Benign	Benign/Likely benign
chr11	46739206	G	A	intron_variant	rs3136516	F2	0.491439	Benign	Benign
chr11	65540355	T	C	missense_variant	rs752339288	LTBP3	6.25254e-06	Likely_benign
chr11	65551467	C	T	missense_variant	rs570380350	LTBP3	0.000387878	Benign	Benign/Likely benign
chr11	65552280	G	A	missense_variant	rs11545200	LTBP3	0.0721079	Benign	Benign
chr11	65557854	C	CCAGCAG	conservative_inframe_insertion	rs71036212	LTBP3	0.157748	Benign	Benign
chr11	65557854	CCAG	C	conservative_inframe_deletion	rs71036212	LTBP3	0.017951	Benign	Benign/Likely benign
chr11	67490085	C	T	synonymous_variant	rs2276020	AIP	0.0209294	Benign	Benign
chr11	67490352	C	A	missense_variant	rs641081	AIP	0.984749	Benign	Benign
chr11	67490903	G	T	synonymous_variant	rs554226457	AIP	1.7804e-05	Benign	Likely benign
chr11	102795573	G	A	synonymous_variant	rs139639462	MMP1	2.60029e-05	Likely_benign
chr11	102795585	T	C	synonymous_variant	rs470558	MMP1	0.94072	Benign	Benign
chr11	102796715	CA	C	frameshift_variant	rs17879749	MMP1	0.0136234	Benign	Benign
chr11	102797291	C	T	synonymous_variant	rs10488	MMP1	0.0614735	Benign	Benign
chr11	102838694	A	G	synonymous_variant	rs520540	MMP3	0.518256	Benign	Benign
chr11	102842716	G	C	synonymous_variant	rs41380244	MMP3	0.0860647	Benign	Benign
chr11	102842734	A	G	synonymous_variant	rs602128	MMP3	0.518065	Benign	Benign
chr11	102842889	T	C	missense_variant	rs679620	MMP3	0.521041	Benign	Benign
chr11	102843449	A	G	missense_variant	rs782196428	MMP3		Uncertain_significance
chr11	102843513	C	T	missense_variant	rs201131528	MMP3	1.77929e-05	Benign
chr11	102843514	G	C	missense_variant	rs113324830	MMP3	9.37588e-05	Benign
chr11	102954497	C	T	missense_variant	rs181426884	MMP13	0.000877263	Benign	Benign/Likely benign
chr11	102955456	G	A	missense_variant	rs748106896	MMP13	7.66199e-05	Uncertain_significance	Uncertain significance
chr11	125595967	T	C	synonymous_variant	rs10082632	STT3A	0.0680291	Benign	Benign
chr11	125606357	C	G	synonymous_variant	rs34964592	STT3A	0.0677121	Benign	Benign
chr11	125609468	G	A	synonymous_variant	rs2241502	STT3A	0.361391	Benign	Benign
chr11	125618509	C	T	synonymous_variant	rs17140116	STT3A	0.0684765	Benign	Benign
chr11	128902557	C	T	intron_variant	rs11221503	KCNJ5	0.203921	Benign
chr11	128904492	G	C	intron_variant	rs199933419	KCNJ5	0.00144796	Benign
chr11	128904493	C	A	intron_variant	rs200644518	KCNJ5	0.00146144	Benign
chr11	128911394	C	T	missense_variant	rs115012103	KCNJ5	0.000465158	Benign	Benign/Likely benign
chr11	128911444	T	C	synonymous_variant	rs6590357	KCNJ5	0.825655	Benign	Benign
chr11	128912083	T	G	synonymous_variant	rs7118824	KCNJ5	0.822435	Benign	Benign
chr11	128912107	T	C	synonymous_variant	rs7118833	KCNJ5	0.822588	Benign	Benign
chr11	128912117	C	G	missense_variant	rs7102584	KCNJ5	0.984262	Benign	Benign
chr11	128917590	GTGTTT	G	3_prime_UTR_variant	rs36205004	KCNJ5	0.0583333	Benign	Conflicting classifications of pathogenicity
chr11	128917590	GTGTTTTGTTT	G	3_prime_UTR_variant	rs36205004	KCNJ5	0.389831	Benign	Benign
chr11	128917590	GTGTTTTGTTT	GTGTTT	3_prime_UTR_variant	rs36205004	KCNJ5	0.0583333	Benign	Conflicting classifications of pathogenicity
chr12	14882112	A	C	3_prime_UTR_variant	rs80337043	MGP	0.00395944	Benign	Benign
chr12	14882147	T	C	missense_variant	rs4236	MGP	0.386368	Benign	Benign
chr12	14882985	T	C	missense_variant	rs1801716	MGP	0.00484126	Benign	Benign/Likely benign
chr12	14885769	G	A	missense_variant	rs142330429	MGP	0.00398439	Benign	Benign
chr12	47841846	T	G	3_prime_UTR_variant	rs527373238	VDR	0	Likely_benign	Uncertain significance
chr12	47842840	G	T	3_prime_UTR_variant	rs9729	VDR	0.5	Benign	Benign
chr12	47843326	A	G	3_prime_UTR_variant	rs56382517	VDR	0.0208333	Benign	Uncertain significance
chr12	47843496	A	AGCTGG	3_prime_UTR_variant	rs11574130	VDR	0.0414013	Likely_benign	Uncertain significance
chr12	47843566	CT	C	3_prime_UTR_variant	rs530894692	VDR	0	Likely_benign	Uncertain significance
chr12	47844695	C	T	3_prime_UTR_variant	rs539180933	VDR	0.000140478	Likely_benign	Uncertain significance
chr12	47844974	A	G	synonymous_variant	rs731236	VDR	0.376013	Benign	Benign
chr12	47846052	C	T	intron_variant	rs1544410	VDR		Benign	Benign
chr12	47863543	C	T	intron_variant	rs1540339	VDR		Benign
chr12	47863983	T	C	intron_variant	rs2239179	VDR		Benign
chr12	47879112	A	G	start_lost	rs2228570	VDR	0.62531	Benign	Benign
chr12	47899822	C	G	intron_variant	rs11168292	VDR	0.316833	Benign	Benign
chr12	47899933	G	T	intron_variant	rs11168293	VDR	0.329326	Benign	Benign
chr12	47902703	A	G	intron_variant	rs4760658	VDR		Benign
chr12	47974193	C	T	missense_variant	rs2070739	COL2A1	0.118478	Benign	Benign
chr12	47974681	G	A	synonymous_variant	rs17122498	COL2A1	0.00879302	Benign	Benign
chr12	47974758	C	T	missense_variant	rs12721427	COL2A1	0.07016	Benign	Benign
chr12	47977358	C	T	missense_variant	rs143363942	COL2A1	0.000117698	Benign	Benign/Likely benign
chr12	47981785	A	G	synonymous_variant	rs1635553	COL2A1	0.471759	Benign	Benign
chr12	47982508	G	A	synonymous_variant	rs2276454	COL2A1	0.403818	Benign	Benign
chr12	47984597	A	G	splice_region_variant,synonymous_variant	rs41317939	COL2A1	0.0645966	Benign	Benign
chr12	47997633	G	T	synonymous_variant	rs3737548	COL2A1	0.218047	Benign	Benign
chr12	48004297	T	A	missense_variant	rs3803183	COL2A1	0.814704	Benign	Benign
chr12	48005620	T	C	missense_variant	rs1859444	COL2A1	0.885246	Benign
chr12	53963768	C	G	non_coding_transcript_exon_variant	rs7958904	HOTAIR	0.5	Benign
chr12	69253134	G	A	synonymous_variant	rs2305641	CPSF6	0.444058	Benign
chr12	102400131	C	CT	3_prime_UTR_variant	rs35306040	IGF1		Benign	Uncertain significance
chr12	102400131	C	CTT	3_prime_UTR_variant	rs35306040	IGF1		Likely_benign
chr12	102400131	CT	C	3_prime_UTR_variant	rs35306040	IGF1		Benign	Uncertain significance
chr12	102400131	CT	CTT	3_prime_UTR_variant	rs35306040	IGF1		Benign	Uncertain significance
chr12	102402227	G	GAT	3_prime_UTR_variant	rs201878788	IGF1	0.00925519	Likely_benign	Uncertain significance
chr12	102481775	C	CT	frameshift_variant	rs77110610	IGF1	0.357143	Likely_benign
chr12	102481775	C	CTT	frameshift_variant	rs77110610	IGF1	0	Likely_pathogenic
chr12	102481791	A	G	missense_variant	rs35767	IGF1	0.875	Benign
chr12	109783720	G	A	synonymous_variant	rs546957932	TRPV4	0.00014779	Benign	Benign/Likely benign
chr12	109788574	G	A	synonymous_variant	rs3742037	TRPV4	0.154472	Benign	Benign
chr12	109800676	G	A	synonymous_variant	rs1344554	TRPV4	0.0543404	Benign	Benign
chr12	109800682	A	G	synonymous_variant	rs3742034	TRPV4	0.0962363	Benign	Benign
chr12	109803033	T	G	synonymous_variant	rs3825394	TRPV4	0.567528	Benign	Benign
chr12	109814742	G	A	missense_variant	rs3742030	TRPV4	0.0300357	Benign	Benign
chr12	109818520	G	T	intron_variant	rs79762876	TRPV4		Benign
chr12	120212618	C	T	intron_variant	rs79483820	PXN	0.00656147	Benign
chr12	120214832	A	G	missense_variant		PXN		Uncertain_significance
chr12	120219569	AG	A	frameshift_variant	rs548850827	PXN	0.000109029	Likely_benign
chr12	120219631	A	G	missense_variant	rs575734538	PXN	0.000114093	Benign
chr12	120222865	G	A	missense_variant,splice_region_variant		PXN		Uncertain_significance
chr12	120224174	T	C	missense_variant	rs4767884	PXN	0.791956	Benign
chr12	120224702	T	C	intron_variant	rs71541558	PXN	0.0123245	Benign
chr12	123304665	T	C	missense_variant	rs944212646	SBNO1		Uncertain_significance
chr12	123309557	G	T	synonymous_variant	rs3825141	SBNO1	0.0430856	Benign
chr12	123313662	T	C	missense_variant	rs61760910	SBNO1	0.00618487	Benign
chr12	123315391	C	T	synonymous_variant	rs61751327	SBNO1	0.042736	Benign
chr12	123315427	A	G	synonymous_variant	rs6488868	SBNO1	0.727831	Benign
chr12	123321672	C	T	missense_variant	rs1060105	SBNO1	0.198091	Benign
chr12	123326326	G	A	synonymous_variant	rs61388686	SBNO1	0.666085	Benign
chr12	123327748	T	C	synonymous_variant	rs200446829	SBNO1	0.000949521	Benign	Benign
chr12	123341012	C	T	synonymous_variant	rs12322888	SBNO1	0.207825	Benign
chr13	42572346	G	C	intron_variant	rs7984870	TNFSF11		Benign
chr13	42574429	T	C	synonymous_variant	rs2296533	TNFSF11	0.449408	Benign	Benign
chr13	42606888	T	C	synonymous_variant	rs9562415	TNFSF11	0.0172149	Benign	Benign
chr13	46553678	C	T	synonymous_variant	rs45540131	LRCH1	0.113972	Benign
chr13	46685919	T	C	missense_variant	rs842381	LRCH1	0.997046	Benign
chr13	46733974	A	G	synonymous_variant	rs2298086	LRCH1	0.986782	Benign
chr13	49701894	T	C	missense_variant	rs759231150	KPNA3	5.49225e-06	Likely_benign
chr13	49709683	T	C	synonymous_variant	rs17073322	KPNA3	0.0557284	Benign
chr13	49721979	C	T	synonymous_variant	rs1127021	KPNA3	0.875904	Benign
chr13	51933265	T	C	3_prime_UTR_variant	rs139053981	ATP7B	0	Benign	Uncertain significance
chr13	51935024	T	G	missense_variant		ATP7B		Uncertain_significance
chr13	51937341	C	T	missense_variant	rs529307157	ATP7B	3.83065e-05	Uncertain_significance	Conflicting classifications of pathogenicity
chr13	51939199	G	A	splice_region_variant,intron_variant	rs140708492	ATP7B	0.00391433	Benign	Conflicting classifications of pathogenicity
chr13	51941218	A	G	missense_variant	rs1801249	ATP7B	0.579433	Benign	Benign
chr13	51946335	C	T	synonymous_variant	rs1801247	ATP7B	0.0579632	Benign	Benign
chr13	51946371	C	T	synonymous_variant	rs1801246	ATP7B	0.0689282	Benign	Benign
chr13	51946430	A	T	missense_variant		ATP7B		Likely_pathogenic
chr13	51949672	C	T	missense_variant	rs732774	ATP7B	0.578331	Benign	Benign
chr13	51950352	T	C	missense_variant	rs1061472	ATP7B	0.564555	Benign	Benign
chr13	51960178	G	T	synonymous_variant	rs1486015000	ATP7B	3.42079e-06	Likely_benign	Likely benign
chr13	51970669	C	G	missense_variant	rs1801244	ATP7B	0.471561	Benign	Benign
chr13	51974004	A	C	missense_variant	rs1801243	ATP7B	0.478141	Benign	Benign/Likely benign
chr13	51991990	T	G	intron_variant	rs9535826	ATP7B		Benign
chr13	51995315	T	C	intron_variant	rs113115720	ATP7B	0.0470629	Benign
chr13	51999286	G	A	intron_variant	rs9535828	ATP7B		Benign
chr13	52011455	T	TCGGCG	5_prime_UTR_variant	rs148013251	ATP7B	0.481803	Benign	Benign/Likely benign
chr13	112902270	G	A	missense_variant	rs9603799	MCF2L	0.0216341	Benign
chr13	112902349	G	A	synonymous_variant	rs141940257	MCF2L	0.00164903	Benign
chr13	113011359	G	C	intron_variant	rs72485690	MCF2L		Benign
chr13	113011441	T	C	intron_variant	rs9549332	MCF2L		Benign
chr13	113011468	A	G	intron_variant	rs9549333	MCF2L		Benign
chr13	113011534	T	C	intron_variant	rs9549634	MCF2L		Benign
chr13	113011564	C	T	intron_variant	rs571176376	MCF2L		Benign
chr13	113011631	GGACGGTGGACAGGCAGTGTGGACGGTGGACACTGTGATGCA	G	intron_variant	rs1390929086	MCF2L		Benign
chr13	113011646	A	G	intron_variant	rs9549334	MCF2L		Benign
chr13	113011664	T	C	intron_variant	rs9549335	MCF2L		Benign
chr13	113011672	A	AGACGGTGGACAGGCGGTGTGGACGGTGGACACCGTGATGCG	intron_variant		MCF2L		Uncertain_significance
chr13	113011672	A	G	intron_variant	rs9549336	MCF2L		Benign
chr13	113011712	C	A	intron_variant	rs372893109	MCF2L		Likely_benign
chr13	113011746	CGTGATGAGGACGGTGGACAGGCGGTGTGGACGGTGGACACTGTGATGCGGACGGTGGACAGGCGGTGTGGACGGTGGACACT	C	intron_variant	rs1566732423	MCF2L		Uncertain_significance
chr13	113011753	A	C	intron_variant	rs9549337	MCF2L		Benign
chr13	113011786	CTGTGATG	C	intron_variant	rs1390518054	MCF2L		Uncertain_significance
chr13	113011787	T	C	intron_variant	rs9549338	MCF2L		Benign
chr13	113011794	CGGACGGTGGACAGGCGGTGTGGACGGTGGACACT	C	intron_variant	rs1594641044	MCF2L		Uncertain_significance
chr13	113011828	T	C	intron_variant	rs9549339	MCF2L		Likely_benign
chr13	113011909	CTG	C	intron_variant	rs769709763	MCF2L		Uncertain_significance
chr13	113011941	T	C	intron_variant	rs372839425	MCF2L		Likely_benign
chr13	113011952	C	T	intron_variant	rs1289418005	MCF2L		Benign
chr13	113011984	T	C	intron_variant	rs2084163534	MCF2L		Likely_benign
chr13	113012062	A	G	intron_variant	rs1355891484	MCF2L		Benign
chr13	113012085	A	G	intron_variant	rs962673245	MCF2L		Benign
chr13	113012260	G	A	intron_variant	rs143212104	MCF2L		Benign
chr13	113012329	C	T	intron_variant	rs560417312	MCF2L		Benign
chr13	113012432	G	T	intron_variant	rs73576804	MCF2L		Benign
chr13	113012515	T	C	intron_variant	rs1475779606	MCF2L		Likely_benign
chr13	113012525	A	G	intron_variant	rs1182239803	MCF2L		Benign
chr13	113012546	G	A	intron_variant	rs557835247	MCF2L		Benign
chr13	113012582	AC	A	intron_variant	rs1269030606	MCF2L		Uncertain_significance
chr13	113012587	A	G	intron_variant	rs1317434739	MCF2L		Likely_benign
chr13	113012596	T	G	intron_variant	rs116470695	MCF2L		Benign
chr13	113012605	T	C	intron_variant	rs1210584097	MCF2L		Likely_benign
chr13	113012646	T	C	intron_variant	rs1594648367	MCF2L		Likely_benign
chr13	113012653	C	A	intron_variant	rs1352247339	MCF2L		Likely_benign
chr13	113012658	G	A	intron_variant	rs370424611	MCF2L		Benign
chr13	113012668	C	T	intron_variant	rs372993261	MCF2L		Benign
chr13	113012730	A	G	intron_variant	rs61967109	MCF2L		Benign
chr13	113012748	T	C	intron_variant	rs1172140181	MCF2L		Likely_benign
chr13	113012789	T	C	intron_variant	rs1190007113	MCF2L		Likely_benign
chr13	113012796	C	A	intron_variant	rs1277303217	MCF2L		Likely_benign
chr13	113012830	T	C	intron_variant	rs1594649809	MCF2L		Likely_benign
chr13	113012852	C	T	intron_variant	rs1386331821	MCF2L		Likely_benign
chr13	113012872	GAGATGCGGACGGTGGA	G	intron_variant		MCF2L		Uncertain_significance
chr13	113012873	A	T	intron_variant	rs9577191	MCF2L		Likely_benign
chr13	113012882	C	T	intron_variant	rs1197653110	MCF2L		Likely_benign
chr13	113012964	C	CGGTGGACAGGCGGTGTGGACGGTGGACACTGTGATGCGGAT	intron_variant	rs1450670297	MCF2L		Uncertain_significance
chr13	113012964	C	T	intron_variant	rs375199342	MCF2L		Benign
chr13	113013002	G	A	intron_variant	rs1023686198	MCF2L		Likely_benign
chr13	113026929	C	A	intron_variant	rs9549343	MCF2L	0.380318	Benign
chr13	113033914	A	C	intron_variant	rs3011507	MCF2L	0.786972	Benign
chr13	113033955	G	A	intron_variant	rs3011506	MCF2L	0.220712	Benign
chr13	113033972	TC	T	intron_variant	rs57693403	MCF2L	0.661857	Benign
chr13	113044858	C	G	intron_variant	rs200111582	MCF2L	0.000592913	Benign
chr13	113044881	G	A	intron_variant	rs533677749	MCF2L	0.000154733	Benign
chr13	113066162	C	T	synonymous_variant	rs2297192	MCF2L	0.176229	Benign
chr13	113074467	G	A	synonymous_variant	rs3814264	MCF2L	0.225509	Benign
chr13	113078695	C	T	synonymous_variant	rs35155188	MCF2L	0.0905228	Benign
chr13	113082453	A	G	synonymous_variant	rs572172660	MCF2L	0.000454983	Benign
chr13	113084912	T	C	synonymous_variant	rs2281723	MCF2L	0.0781239	Benign
chr13	113087276	G	A	synonymous_variant	rs9604022	MCF2L	0.160392	Benign
chr13	113090127	C	T	intron_variant	rs4907588	MCF2L	0.11598	Benign
chr13	113090145	C	T	intron_variant	rs75112596	MCF2L	0.0335701	Benign
chr13	113091154	G	C	intron_variant	rs1031292967	MCF2L	8.68384e-07	Uncertain_significance
chr13	113821971	A	G	synonymous_variant	rs7400002	GAS6	0.268127	Benign
chr13	113822106	G	A	synonymous_variant	rs34975371	GAS6	0.0446693	Benign
chr13	113827141	G	A	synonymous_variant	rs1803628	GAS6	0.117891	Benign
chr13	113828589	G	A	synonymous_variant	rs374659031	GAS6	0.000242941	Benign
chr13	113828592	C	G	synonymous_variant	rs8191975	GAS6	0.0905587	Benign
chr13	113863851	C	T	missense_variant	rs563012373	GAS6	8.41407e-05	Likely_benign
chr13	113863851	CCAG	C	conservative_inframe_deletion	rs897584782	GAS6	0.00148206	Uncertain_significance
chr14	53949881	TC	T	3_prime_UTR_variant	rs878985651	BMP4	0.00886802	Benign	Uncertain significance
chr14	53949882	CCT	C	3_prime_UTR_variant	rs140085940	BMP4	0.016616	Benign	Conflicting classifications of pathogenicity
chr14	53949882	CCTTT	C	3_prime_UTR_variant		BMP4	0.000209447	Benign
chr14	53949883	C	CA	3_prime_UTR_variant	rs796563569	BMP4	0.115476	Benign	Conflicting classifications of pathogenicity
chr14	53949883	C	CAT	3_prime_UTR_variant	rs796563569	BMP4	0.301085	Benign	Conflicting classifications of pathogenicity
chr14	53949883	C	CATT	3_prime_UTR_variant	rs796563569	BMP4	0.0475623	Benign	Conflicting classifications of pathogenicity
chr14	53949883	CT	C	3_prime_UTR_variant	rs1555339771	BMP4	0.100662	Benign	Likely benign
chr14	53949883	CTT	C	3_prime_UTR_variant	rs1555339771	BMP4	0.0170134	Benign
chr14	53949883	CTTT	C	3_prime_UTR_variant	rs1555339771	BMP4	0.0012094	Benign
chr14	53950804	A	G	missense_variant	rs17563	BMP4	0.527056	Benign	Benign/Likely benign
chr14	75959002	G	A	3_prime_UTR_variant	rs3917216	TGFB3	0.00133495	Benign	Uncertain significance
chr14	75981428	T	TA	5_prime_UTR_variant	rs71451199	TGFB3	0.0337153	Benign	Uncertain significance
chr14	75981428	TA	T	5_prime_UTR_variant	rs71451199	TGFB3	0.0781933	Benign	Uncertain significance
chr14	80203237	T	C	missense_variant	rs225014	DIO2	0.376737	Benign	other
chr14	100834675	T	C	non_coding_transcript_exon_variant	rs10132552	MEG3	0.247731	Benign
chr15	48428455	C	T	synonymous_variant	rs363830	FBN1	0.0222655	Benign	Benign
chr15	48430687	A	G	synonymous_variant	rs363836	FBN1	0.0222714	Benign	Benign
chr15	48446825	A	G	splice_region_variant,intron_variant	rs193922217	FBN1	0.000210973	Benign	Conflicting classifications of pathogenicity
chr15	48487034	GTAAAA	G	intron_variant	rs72158035	FBN1	0.152697	Benign	Benign/Likely benign
chr15	48487333	G	C	missense_variant	rs140598	FBN1	0.0118142	Benign	Benign
chr15	48488487	T	C	missense_variant	rs375996640	FBN1	0.000119052	Benign	Conflicting classifications of pathogenicity
chr15	48505110	A	G	synonymous_variant	rs25458	FBN1	0.166343	Benign	Benign
chr15	48596279	T	C	splice_region_variant,intron_variant	rs375721252	FBN1	0.000181369	Benign	Conflicting classifications of pathogenicity
chr15	48644695	C	T	synonymous_variant	rs543230518	FBN1	0.000273624	Benign	Benign/Likely benign
chr15	48644708	G	A	missense_variant	rs1489806847	FBN1	6.15678e-06	Likely_benign	Conflicting classifications of pathogenicity
chr15	57963929	C	T	missense_variant	rs4646626	ALDH1A2	0.50031	Benign
chr15	58014595	A	G	intron_variant	rs12903202	ALDH1A2	0.0724124	Benign	Benign
chr15	58597609	T	C	missense_variant	rs754749206	ADAM10	2.39418e-05	Benign
chr15	65196790	C	T	missense_variant	rs938952	CILP	0.810463	Benign	Benign
chr15	65197350	T	C	missense_variant	rs2679117	CILP	0.998886	Benign	Benign
chr15	65198563	T	C	missense_variant	rs2679118	CILP	0.998918	Benign
chr15	65201874	A	G	missense_variant,splice_region_variant	rs2073711	CILP	0.602727	Benign	risk factor,Benign
chr15	67099011	C	T	intron_variant	rs549990981	SMAD3	0.000783574	Benign
chr15	67164997	A	G	synonymous_variant	rs1065080	SMAD3	0.875007	Benign	Benign
chr15	67165360	A	G	missense_variant	rs35874463	SMAD3	0.0506272	Benign	Benign/Likely benign
chr15	74785026	C	A	intron_variant	rs1378942	CSK		Benign
chr15	74798906	C	T	synonymous_variant	rs11553760	CSK	0.0350091	Benign
chr15	74799323	G	A	synonymous_variant	rs2229729	CSK	0.0119787	Benign
chr15	74800426	C	T	synonymous_variant	rs200813496	CSK	9.78298e-05	Benign
chr15	74801048	C	T	synonymous_variant	rs2229730	CSK	0.0642785	Benign
chr15	74802442	G	A	missense_variant	rs147023686	CSK	0.000820389	Benign	Benign
chr15	88838760	C	T	synonymous_variant	rs534678891	ACAN	0.000116989	Benign	Benign
chr15	88838796	A	C	synonymous_variant	rs372041880	ACAN	0.003656	Benign	Benign
chr15	88838898	C	A	missense_variant	rs16942318	ACAN	0.00661283	Benign	Benign
chr15	88838986	C	T	missense_variant	rs550510196	ACAN	0.00050002	Benign	Benign
chr15	88840139	C	T	synonymous_variant	rs375544241	ACAN	0.00124386	Benign	Benign/Likely benign
chr15	88843421	G	A	missense_variant	rs34949187	ACAN	0.164165	Benign	Benign
chr15	88843602	G	A	synonymous_variant	rs572285643	ACAN	2.55791e-05	Benign	Likely benign
chr15	88845663	A	G	missense_variant	rs148070768	ACAN	0.00645143	Benign	Benign
chr15	88845674	C	T	synonymous_variant	rs16942341	ACAN	0.0334346	Benign	Benign
chr15	88847282	C	T	missense_variant	rs117116488	ACAN	0.0109871	Benign	Benign/Likely benign
chr15	88847303	A	T	missense_variant	rs117881662	ACAN	0.000521178	Benign	Benign
chr15	88847929	C	A	synonymous_variant	rs2272023	ACAN	0.735014	Benign	Benign
chr15	88849458	C	A	missense_variant	rs144501729	ACAN	0.00641982	Benign	Benign
chr15	88849514	T	C	synonymous_variant	rs1568116	ACAN	0.985925	Benign	Benign
chr15	88849587	G	A	missense_variant	rs200412974	ACAN	0.00648808	Benign	Benign
chr15	88849634	C	T	synonymous_variant	rs551265948	ACAN	0.000405363	Benign	Benign
chr15	88851804	G	A	synonymous_variant	rs372553119	ACAN	0.000364493	Benign	Benign
chr15	88854874	C	T	synonymous_variant	rs2351491	ACAN	0.599718	Benign	Benign
chr15	88855099	G	A	synonymous_variant	rs3743399	ACAN	0.798365	Benign	Benign
chr15	88855322	C	A	missense_variant	rs35430524	ACAN	0.103937	Benign	Benign
chr15	88855374	G	T	missense_variant	rs938608	ACAN	0.606981	Benign	Benign
chr15	88855400	T	A	missense_variant	rs938609	ACAN	0.596525	Benign	Benign
chr15	88855428	C	T	missense_variant	rs559189679	ACAN	0.000248457	Benign	Likely benign
chr15	88855565	G	A	missense_variant	rs767234739	ACAN	1.22137e-05	Likely_benign	Uncertain significance
chr15	88855594	C	T	synonymous_variant	rs4080952	ACAN	0.258489	Benign	Benign
chr15	88855632	C	G	missense_variant	rs555664055	ACAN	6.4459e-05	Benign
chr15	88855651	C	T	synonymous_variant	rs28496654	ACAN	0.5	Benign
chr15	88855765	C	T	synonymous_variant	rs113229763	ACAN	0.00840739	Benign	Benign
chr15	88855879	C	T	synonymous_variant	rs62023519	ACAN	0.392189	Benign	Benign
chr15	88856222	G	A	missense_variant	rs11638262	ACAN		Benign	Benign
chr15	88856678	G	A	missense_variant	rs200156631	ACAN	0.000107298	Benign
chr15	88856735	G	A	missense_variant	rs61465251	ACAN	0.00130583	Benign	Likely benign
chr15	88856735	GCTGCCCCTGGAGTAGAGGACATCAGCGGGCTTCCTTCTGGAGAAGTTCTAGAGACTA	G	disruptive_inframe_deletion	rs1567185246	ACAN	0.0105923	Benign
chr15	88856755	C	G	missense_variant	rs201822759	ACAN	0.00690159	Benign	Benign
chr15	88856792	A	G	missense_variant	rs12899191	ACAN	0.0443974	Benign	Benign
chr15	88856812	G	C	missense_variant	rs28559926	ACAN	0.0117047	Benign
chr15	88856866	T	G	missense_variant	rs377697360	ACAN	0.000214402	Benign	Uncertain significance
chr15	88856875	T	C	synonymous_variant	rs78806382	ACAN	0.00169471	Benign
chr15	88857108	A	C	missense_variant	rs2882676	ACAN	0.6045	Benign	Benign
chr15	88857449	A	G	missense_variant	rs28407189	ACAN	0.0345219	Benign	Benign
chr15	88857641	A	T	missense_variant	rs542821166	ACAN	6.77303e-05	Benign
chr15	88857732	G	T	missense_variant	rs79925540	ACAN	0.00703859	Benign	Benign
chr15	88857878	A	G	missense_variant	rs4932439	ACAN	0.79904	Benign	Benign
chr15	88858384	T	G	synonymous_variant	rs3825994	ACAN	0.70886	Benign	Benign
chr15	88858385	G	C	missense_variant	rs76282091	ACAN	0.00705693	Benign	Benign
chr15	88858820	A	G	missense_variant	rs1042630	ACAN	0.72516	Benign	Benign
chr15	88858945	C	G	missense_variant	rs34153007	ACAN	0.00273395	Benign	Benign
chr15	88859008	T	C	synonymous_variant	rs1042631	ACAN	0.772328	Benign	Benign
chr15	88859365	T	G	synonymous_variant	rs698621	ACAN	0.607284	Benign	Benign
chr15	88872016	C	G	missense_variant	rs3817428	ACAN	0.239752	Benign	Benign
chr15	88874007	A	G	missense_variant	rs1126823	ACAN	0.257991	Benign	Benign
chr16	1445133	G	GC	3_prime_UTR_variant	rs373942084	CLCN7	0.0625	Likely_benign	Uncertain significance
chr16	1445486	G	GC	3_prime_UTR_variant	rs146690487	CLCN7	0.030303	Benign	Likely benign
chr16	1446499	G	A	3_prime_UTR_variant	rs764192196	CLCN7	2.87938e-05	Likely_benign	Uncertain significance
chr16	1446612	T	C	3_prime_UTR_variant	rs11860968	CLCN7	0.0986108	Benign	Benign
chr16	1450500	C	T	synonymous_variant	rs117461525	CLCN7	0.0930191	Benign	Benign
chr16	1452856	C	T	missense_variant	rs12926089	CLCN7	0.100502	Benign	Benign/Likely benign
chr16	1452863	A	G	synonymous_variant	rs12926669	CLCN7	0.0965813	Benign	Benign
chr16	1453878	T	A	synonymous_variant	rs2235579	CLCN7	0.51231	Benign	Benign
chr16	1454436	C	T	synonymous_variant	rs12935737	CLCN7	0.0931613	Benign	Benign
chr16	1459122	G	A	synonymous_variant	rs12923538	CLCN7	0.126637	Benign	Benign
chr16	1465307	T	A	missense_variant	rs538485246	CLCN7	0.000339369	Benign	Likely benign
chr16	1474849	A	G	synonymous_variant	rs3751884	CLCN7	0.525113	Benign	Benign
chr16	3243888	C	T	synonymous_variant	rs1231122	MEFV	0.434187	Benign	Benign
chr16	3243922	A	T	intron_variant	rs1231123	MEFV	0.426132	Benign	Benign
chr16	3244246	G	A	splice_region_variant,intron_variant	rs77380520	MEFV	0.00367823	Benign	Benign/Likely benign
chr16	3247073	A	G	synonymous_variant	rs224206	MEFV	0.567527	Benign	Benign
chr16	3247100	G	A	synonymous_variant	rs76464258	MEFV	0.00660947	Benign	Conflicting classifications of pathogenicity
chr16	3247175	T	C	synonymous_variant	rs224207	MEFV	0.564906	Benign	Benign
chr16	3247181	C	T	synonymous_variant	rs224208	MEFV	0.563906	Benign	Benign
chr16	3249468	C	T	missense_variant	rs11466024	MEFV	0.00990678	Benign	Conflicting classifications of pathogenicity
chr16	3249586	G	A	missense_variant	rs11466023	MEFV	0.0103327	Benign	Conflicting classifications of pathogenicity
chr16	3249749	G	A	synonymous_variant	rs224213	MEFV	0.577288	Benign	Benign
chr16	3254245	T	C	missense_variant		MEFV		Likely_benign
chr16	3254438	C	T	synonymous_variant	rs770830323	MEFV	2.74245e-06	Likely_benign	Likely benign
chr16	3254463	C	T	missense_variant	rs224222	MEFV	0.242739	Benign	Benign
chr16	3254571	G	A	missense_variant	rs766670643	MEFV	3.29951e-05	Likely_benign	Conflicting classifications of pathogenicity
chr16	3254573	G	T	synonymous_variant	rs224223	MEFV	0.453104	Benign	Benign
chr16	3254626	C	G	missense_variant	rs3743930	MEFV	0.0376983	Benign	Conflicting classifications of pathogenicity
chr16	3254652	G	C	missense_variant		MEFV	6.8647e-07	Uncertain_significance
chr16	3254654	T	C	synonymous_variant	rs224224	MEFV	0.454534	Benign	Benign/Likely benign
chr16	3254725	G	T	missense_variant	rs147557169	MEFV	0.000190351	Likely_benign	Conflicting classifications of pathogenicity
chr16	3254762	A	G	synonymous_variant	rs224225	MEFV	0.455848	Benign	Benign
chr16	27325106	G	A	intron_variant	rs1110470	IL4R		Benign
chr16	27339366	A	G	intron_variant	rs3024530	IL4R		Benign
chr16	27344882	A	G	missense_variant	rs1805010	IL4R	0.451768	Benign	Benign
chr16	27346606	C	T	synonymous_variant	rs2234895	IL4R	0.080721	Benign
chr16	27347700	A	C	intron_variant	rs2239347	IL4R		Benign
chr16	27362551	A	C	missense_variant	rs1805011	IL4R	0.122448	Benign	Benign
chr16	27362594	G	T	synonymous_variant	rs2234898	IL4R	0.12219	Benign	Benign
chr16	27362643	T	C	missense_variant	rs1805012	IL4R	0.10706	Benign	Benign
chr16	27362651	T	C	synonymous_variant	rs2234900	IL4R	0.130602	Benign	Benign
chr16	27362659	C	T	missense_variant	rs1805013	IL4R	0.0427474	Benign
chr16	27362771	C	T	synonymous_variant	rs775630590	IL4R	4.44661e-05	Likely_benign
chr16	27362859	T	C	missense_variant	rs1805015	IL4R	0.165228	Benign	protective
chr16	27363079	A	G	missense_variant	rs1801275	IL4R	0.224659	Benign	Benign
chr16	27363606	T	G	missense_variant	rs1805016	IL4R	0.0586944	Benign
chr16	27364221	G	A	3_prime_UTR_variant	rs1049631	IL4R	0.510484	Benign
chr16	27364466	A	G	3_prime_UTR_variant	rs8832	IL4R	0.486111	Benign
chr16	29664607	C	T	synonymous_variant	rs1050881	SPN	0.0896557	Benign	Benign
chr16	29799377	A	G	synonymous_variant	rs1596848898	KIF22		Likely_benign
chr16	29799998	C	T	synonymous_variant	rs235648	KIF22	0.990333	Benign	Benign
chr16	29802913	G	A	synonymous_variant	rs2450399	KIF22	0.990396	Benign	Benign
chr16	29805096	A	G	intron_variant	rs75393165	KIF22	0.00104623	Benign	Benign
chr16	55485623	G	C	synonymous_variant	rs1132896	MMP2	0.332976	Benign	Benign
chr16	55485695	C	T	synonymous_variant	rs1053605	MMP2	0.073053	Benign	Benign
chr16	55488643	G	A	synonymous_variant	rs776717466	MMP2	2.60012e-05	Benign
chr16	55489793	T	C	synonymous_variant	rs243849	MMP2	0.845859	Benign	Benign
chr16	55493201	G	A	synonymous_variant	rs2287074	MMP2	0.423597	Benign	Benign
chr16	55502815	C	T	synonymous_variant	rs14070	MMP2	0.433463	Benign	Benign
chr16	55502851	C	G	synonymous_variant	rs11541998	MMP2	0.101356	Benign	Benign
chr16	69929452	G	A	synonymous_variant	rs1566452	WWP2	0.75219	Benign
chr16	69929500	G	A	synonymous_variant	rs1875245	WWP2	0.0345233	Benign
chr16	69933994	T	C	synonymous_variant	rs2270841	WWP2	0.751542	Benign
chr16	69936426	A	G	synonymous_variant	rs1983016	WWP2	0.75269	Benign
chr16	69939394	C	T	synonymous_variant	rs2270844	WWP2	0.0640579	Benign
chr16	69939868	C	T	synonymous_variant	rs556525256	WWP2	6.56787e-05	Benign
chr16	69939922	G	A	synonymous_variant	rs3748389	WWP2	0.378424	Benign
chr17	27762841	T	C	synonymous_variant	rs1060826	NOS2	0.630932	Benign	Benign
chr17	27765605	A	G	synonymous_variant	rs1060822	NOS2	0.631017	Benign	Benign
chr17	27769047	G	A	missense_variant	rs183645530	NOS2	0.00010752	Uncertain_significance
chr17	27769571	G	A	missense_variant	rs2297518	NOS2	0.184815	Benign	Benign
chr17	27777485	T	C	intron_variant	rs11080344	NOS2		Benign
chr17	27778906	G	A	synonymous_variant	rs1137933	NOS2	0.21595	Benign	Benign
chr17	27798717	G	A	synonymous_variant	rs3730014	NOS2	0.0155976	Benign
chr17	31095073	C	T	5_prime_UTR_premature_start_codon_gain_variant	rs878967255	NF1	0.000204934	Likely_benign	Uncertain significance
chr17	31148497	G	GATTACTATGGGATTGGTCATTAGTC	intron_variant	rs1479491862	NF1		Uncertain_significance	Likely benign
chr17	31181757	G	A	synonymous_variant	rs1801052	NF1	0.675105	Benign	Benign
chr17	31182623	G	A	synonymous_variant	rs138840528	NF1	0.00379251	Benign	Benign/Likely benign
chr17	31182773	C	T	intron_variant	rs2953000	NF1	0.661301	Benign	Benign
chr17	31182783	G	T	intron_variant	rs2952999	NF1	0.665027	Benign	Benign
chr17	31225150	T	C	missense_variant	rs527563505	NF1	5.95263e-05	Benign	Benign/Likely benign
chr17	31226467	G	A	synonymous_variant	rs2285892	NF1	0.326948	Benign	Benign
chr17	31248995	C	T	missense_variant		NF1	1.36819e-06	Uncertain_significance	Uncertain significance
chr17	31296270	C	T	missense_variant	rs11080149	OMG	0.117924	Benign	Benign
chr17	31305421	G	A	synonymous_variant	rs151096117	EVI2B	0.000627271	Benign	Benign
chr17	31318811	A	G	missense_variant	rs542779466	EVI2A	1.71038e-05	Likely_benign
chr17	31319014	G	A	5_prime_UTR_variant	rs1129506	EVI2A	0.617156	Benign	Benign
chr17	31374739	G	A	3_prime_UTR_variant	rs190144445	NF1	1.21859e-05	Likely_benign
chr17	31374739	G	C	3_prime_UTR_variant	rs190144445	NF1	0.00687302	Benign	Conflicting classifications of pathogenicity
chr17	31375012	T	TTA	3_prime_UTR_variant	rs369548314	NF1	0.00266182	Likely_benign	Uncertain significance
chr17	31375012	TTA	T	3_prime_UTR_variant	rs369548314	NF1	0.377078	Benign	Benign
chr17	31375012	TTA	TTATA	3_prime_UTR_variant	rs369548314	NF1	0.00266182	Likely_benign	Uncertain significance
chr17	34256113	G	C	intron_variant	rs2857657	CCL2	0.831374	Benign
chr17	34256250	T	C	synonymous_variant	rs4586	CCL2	0.388058	Benign	Benign
chr17	45982882	G	A	synonymous_variant	rs56234850	MAPT	0.202356	Benign	Benign
chr17	45983126	G	A	missense_variant	rs80189278	MAPT	0.0542652	Benign	Benign
chr17	45983409	C	T	missense_variant	rs63750417	MAPT	0.193804	Benign	Benign
chr17	45983440	G	A	synonymous_variant	rs545400674	MAPT	3.36939e-05	Benign
chr17	45983657	G	A	missense_variant	rs62063786	MAPT	0.193628	Benign	Benign
chr17	45983659	C	T	synonymous_variant	rs63750222	MAPT	0.120058	Benign	Benign
chr17	45983670	T	C	missense_variant	rs62063787	MAPT	0.193627	Benign	Benign
chr17	45983912	C	T	missense_variant	rs17651549	MAPT	0.19435	Benign	Benign
chr17	45990016	T	C	missense_variant	rs2258689	MAPT	0.226735	Benign	Benign
chr17	45990034	T	C	missense_variant	rs10445337	MAPT	0.193585	Benign	Benign
chr17	45991558	G	A	synonymous_variant	rs1052551	MAPT	0.193335	Benign	Benign
chr17	45993928	T	C	intron_variant	rs62063845	MAPT	0.194747	Benign	Benign
chr17	45996523	A	G	synonymous_variant	rs1052553	MAPT	0.195551	Benign	Benign
chr17	45996607	T	C	synonymous_variant	rs17652121	MAPT	0.193584	Benign	Benign
chr17	45996640	G	A	synonymous_variant	rs373081497	MAPT	0.000266824	Benign	Benign/Likely benign
chr17	46025316	C	CT	3_prime_UTR_variant	rs1491446284	MAPT	0.43865	Benign	Benign
chr17	46026459	T	C	3_prime_UTR_variant	rs75010486	MAPT	0.0810811	Benign	Benign
chr17	50184473	CACAAAAAAAA	C	3_prime_UTR_variant	rs577594286	COL1A1	0.000423317	Benign
chr17	50184475	CA	C	3_prime_UTR_variant	rs58879635	COL1A1	0.149615	Benign	Likely benign
chr17	50184475	CAA	C	3_prime_UTR_variant	rs58879635	COL1A1	0.111425	Benign	Benign
chr17	50184475	CAAA	C	3_prime_UTR_variant	rs58879635	COL1A1	0.0192057	Benign
chr17	50184491	A	AG	3_prime_UTR_variant	rs1372138293	COL1A1	0.0160396	Benign
chr17	50184491	A	G	3_prime_UTR_variant	rs1061970	COL1A1	0.138624	Benign	Conflicting classifications of pathogenicity
chr17	50184820	G	GTGCT	3_prime_UTR_variant	rs3840870	COL1A1	0.645703	Benign	Benign/Likely benign
chr17	50185257	C	CT	3_prime_UTR_variant	rs56302025	COL1A1	0.131538	Benign	Likely benign
chr17	50185257	C	CTT	3_prime_UTR_variant	rs56302025	COL1A1	0.251244	Benign	Conflicting classifications of pathogenicity
chr17	50185257	C	CTTT	3_prime_UTR_variant	rs56302025	COL1A1	0.0442966	Benign	Uncertain significance
chr17	50185257	CT	C	3_prime_UTR_variant	rs56302025	COL1A1	0.0119472	Benign	Likely benign
chr17	50185510	A	G	missense_variant	rs577626107	COL1A1	0.00037282	Benign	Benign
chr17	50185847	G	A	synonymous_variant	rs1800219	COL1A1	0.00157744	Benign	Benign/Likely benign
chr17	50187087	A	G	synonymous_variant	rs1800218	COL1A1	0.00585837	Benign	Benign
chr17	50188114	A	G	synonymous_variant	rs1800217	COL1A1	0.00708126	Benign	Benign/Likely benign
chr17	50190862	A	G	synonymous_variant	rs2734272	COL1A1	0.999951	Benign	Benign
chr17	50191451	C	T	missense_variant	rs150803124	COL1A1	0.000239444	Benign	Conflicting classifications of pathogenicity
chr17	50191799	C	T	missense_variant	rs372215246	COL1A1	8.08864e-05	Uncertain_significance	Uncertain significance
chr17	50197978	G	C	missense_variant	rs72667032	COL1A1	0.00513939	Benign	Conflicting classifications of pathogenicity
chr17	50199874	C	A	synonymous_variant	rs1057297	COL1A1	0.014779	Benign	Benign
chr17	50200388	C	A	intron_variant	rs1800012	COL1A1		Benign	Benign/Likely benign
chr17	61590592	G	A	stop_gained	rs17610181	NACA2	0.153812	Benign
chr17	61590660	G	C	missense_variant	rs61739273	NACA2	0.153958	Benign
chr17	61590717	T	C	missense_variant	rs547994930	NACA2	0.00063206	Benign
chr17	61590991	C	T	missense_variant	rs17531723	NACA2	0.143432	Benign
chr17	72122794	C	T	synonymous_variant	rs2229989	SOX9	0.207381	Benign	Benign
chr17	72122841	G	A	missense_variant	rs777760556	SOX9	4.10429e-06	Uncertain_significance
chr17	72125122	TA	T	3_prime_UTR_variant	rs572140615	SOX9	0.00160903	Likely_benign	Likely benign
chr17	72125554	C	CT	3_prime_UTR_variant	rs796896836	SOX9	0.0641705	Benign
chr17	72125554	CT	C	3_prime_UTR_variant	rs796896836	SOX9	0.36088	Benign	Uncertain significance
chr17	72125554	CTT	C	3_prime_UTR_variant	rs796896836	SOX9	0.0338231	Benign
chr17	72126364	C	CT	3_prime_UTR_variant	rs11448561	SOX9	0.121547	Benign	Uncertain significance
chr17	72126364	CT	C	3_prime_UTR_variant	rs11448561	SOX9	0.372216	Benign	Benign
chr17	72126364	CT	CTT	3_prime_UTR_variant	rs11448561	SOX9	0.121547	Benign	Uncertain significance
chr17	72126364	CTT	C	3_prime_UTR_variant	rs11448561	SOX9	0.010734	Likely_benign	Uncertain significance
chr17	72126364	CTT	CT	3_prime_UTR_variant	rs11448561	SOX9	0.372216	Benign	Benign
chr17	78802466	TTTTTTC	T	disruptive_inframe_deletion	rs71964596	USP36	0.500188	Likely_benign
chr17	78802526	G	A	synonymous_variant	rs199789383	USP36	0.000704106	Benign
chr17	78803713	G	A	missense_variant	rs1057040	USP36	0.507791	Benign
chr17	78803778	T	C	missense_variant	rs3088040	USP36	0.553835	Benign
chr17	78803816	A	G	synonymous_variant	rs9302885	USP36	0.552618	Benign
chr17	78807577	T	C	missense_variant	rs3744795	USP36	0.0322454	Benign
chr17	78818700	G	A	synonymous_variant	rs35273233	USP36	0.176989	Benign
chr17	78821008	C	T	missense_variant	rs3744793	USP36	0.424465	Benign
chr17	78823144	A	C	intron_variant	rs530885210	USP36		Likely_benign
chr17	78835488	C	T	synonymous_variant	rs150802920	USP36	0.00115244	Benign
chr17	78992703	G	A	3_prime_UTR_variant	rs11891	CANT1	0.107987	Benign	Benign
chr17	78992721	C	T	3_prime_UTR_variant	rs115856545	CANT1	0.0246577	Benign	Benign
chr17	78993700	G	A	synonymous_variant	rs3803781	CANT1	0.0300256	Benign	Benign
chr17	78997464	A	G	synonymous_variant	rs8077024	CANT1	0.316929	Benign	Benign
chr18	23331390	G	GC	intron_variant	rs143656565	TMEM241	0.0916667	Benign
chr18	23351916	T	A	intron_variant	rs374603713	TMEM241		Likely_benign
chr18	23351978	A	C	intron_variant	rs368014100	TMEM241		Likely_benign
chr18	23373756	G	A	missense_variant	rs8099409	TMEM241	0.481938	Benign
chr18	51054924	C	G	missense_variant	rs1477349147	SMAD4	1.36811e-06	Uncertain_significance	Uncertain significance
chr18	51079965	G	GT	3_prime_UTR_variant	rs755827115	SMAD4	0.219109	Benign	Uncertain significance
chr18	51079965	GT	G	3_prime_UTR_variant	rs755827115	SMAD4	0.0987938	Benign
chr18	51083461	G	GT	3_prime_UTR_variant	rs113155703	SMAD4	0.170388	Benign
chr19	18785055	C	T	synonymous_variant	rs34467947	COMP	0.0631272	Benign	Benign
chr19	18786630	T	C	missense_variant	rs61739916	COMP	0.0458021	Benign	Benign
chr19	41352971	C	G	missense_variant	rs1800471	TGFB1	0.0719457	Benign	Benign
chr19	41353016	G	A	missense_variant	rs1800470	TGFB1	0.606148	Benign	Benign
chr2	20003168	C	T	synonymous_variant	rs28452699	MATN3	0.215106	Benign	Benign
chr2	20003169	G	A	missense_variant	rs77245812	MATN3	0.0162355	Benign	Benign
chr2	20003286	G	A	missense_variant,splice_region_variant	rs370377105	MATN3	1.23457e-05	Likely_benign	Uncertain significance
chr2	20005780	C	T	missense_variant	rs52826764	MATN3	0.0275238	Benign	Benign
chr2	20005919	C	T	synonymous_variant	rs28401180	MATN3	0.442966	Benign	Benign
chr2	20006087	G	A	synonymous_variant	rs28598872	MATN3	0.443162	Benign	Benign
chr2	20006180	G	A	synonymous_variant	rs192462913	MATN3	0.000764905	Benign	Benign/Likely benign
chr2	27083116	C	T	synonymous_variant	rs368718986	EMILIN1	8.03206e-05	Benign
chr2	102165169	G	A	synonymous_variant	rs3917286	IL1R1	0.0132332	Benign
chr2	102174626	C	T	missense_variant	rs28362304	IL1R1	0.0135298	Benign
chr2	102176676	C	T	missense_variant	rs371084247	IL1R1	2.73619e-05	Benign
chr2	102176723	GA	G	frameshift_variant	rs376163784	IL1R1	0.00136811	Benign	Benign
chr2	112778025	C	T	missense_variant	rs547288438	IL1A	5.3357e-05	Uncertain_significance
chr2	112779646	C	A	missense_variant	rs17561	IL1A	0.289976	Benign	Benign
chr2	112832813	G	A	synonymous_variant	rs1143634	IL1B	0.221067	Benign	Affects, association, other,Benign
chr2	112833537	G	A	synonymous_variant	rs140794289	IL1B	0.00169314	Benign	Benign
chr2	112836810	G	A	upstream_gene_variant	rs1143627	IL1B	0.623577	Benign	risk factor
chr2	113116890	T	C	intron_variant	rs4251961	IL1RN		Benign
chr2	113129630	T	C	synonymous_variant	rs419598	IL1RN	0.268121	Benign	Benign
chr2	113132727	T	C	synonymous_variant	rs315952	IL1RN	0.294165	Benign	Benign
chr2	113133350	A	AT	3_prime_UTR_variant	rs565976240	IL1RN	0.0231427	Likely_benign
chr2	113133350	AT	A	3_prime_UTR_variant	rs565976240	IL1RN	0.0541237	Benign	Uncertain significance
chr2	113133552	A	AT	3_prime_UTR_variant	rs4252029	IL1RN	0.00569476	Likely_benign
chr2	151370056	A	G	missense_variant	rs1046668	TNFAIP6	0.140328	Benign
chr2	151379531	TA	T	3_prime_UTR_variant	rs35060021	TNFAIP6	0.461641	Benign
chr2	151379531	TAA	T	3_prime_UTR_variant	rs35060021	TNFAIP6	0.0536389	Benign
chr2	151379531	TAA	TA	3_prime_UTR_variant	rs35060021	TNFAIP6	0.461641	Benign
chr2	151379531	TAAA	T	3_prime_UTR_variant	rs35060021	TNFAIP6	0.000854408	Uncertain_significance
chr2	182834857	G	C	missense_variant	rs7775	FRZB	0.0808997	Benign	risk factor,Benign
chr2	182838608	G	A	missense_variant	rs288326	FRZB	0.103979	Benign	risk factor,Benign
chr2	188987123	G	T	missense_variant		COL3A1		Pathogenic
chr2	188994708	C	CT	splice_region_variant,intron_variant	rs758567906	COL3A1	0.0775218	Benign	Conflicting classifications of pathogenicity
chr2	188994708	CT	C	splice_region_variant,intron_variant	rs758567906	COL3A1	0.194048	Benign	Conflicting classifications of pathogenicity
chr2	188997371	G	A	synonymous_variant	rs7579903	COL3A1	0.139149	Benign	Benign
chr2	188998698	C	A	missense_variant	rs1801183	COL3A1	0.00153596	Benign	Conflicting classifications of pathogenicity
chr2	188999354	G	A	missense_variant	rs1800255	COL3A1	0.248945	Benign	Benign
chr2	188999856	T	C	synonymous_variant	rs1801184	COL3A1	0.272178	Benign	Benign
chr2	189001553	C	G	synonymous_variant	rs148901664	COL3A1	0.000133393	Benign	Benign/Likely benign
chr2	189010695	T	G	missense_variant	rs1516446	COL3A1	0.999466	Benign	Benign
chr2	189033479	G	GT	3_prime_UTR_variant	rs200554257	COL5A2	0.0712074	Benign	Uncertain significance
chr2	189033479	GT	G	3_prime_UTR_variant	rs200554257	COL5A2	0.0332226	Benign
chr2	189039477	A	G	synonymous_variant	rs10208525	COL5A2	0.103006	Benign	Benign/Likely benign
chr2	189039507	T	G	synonymous_variant	rs10197596	COL5A2	0.103588	Benign	Benign/Likely benign
chr2	189043211	A	G	synonymous_variant	rs6434312	COL5A2	0.97264	Benign	Benign
chr2	189068038	G	A	missense_variant	rs35830636	COL5A2	0.0467023	Benign	Benign/Likely benign
chr2	189068105	T	C	synonymous_variant	rs2229495	COL5A2	0.975332	Benign	Benign
chr2	189075416	T	G	missense_variant	rs76148000	COL5A2	0.0259038	Benign	Benign/Likely benign
chr2	189110232	G	T	synonymous_variant	rs4128539	COL5A2	0.9641	Benign	Benign
chr2	189565451	A	G	synonymous_variant	rs2304704	SLC40A1	0.626166	Benign	Benign
chr2	189580769	T	TCCG	5_prime_UTR_variant	rs3833570	SLC40A1	0.584539	Benign	Benign
chr2	191066490	C	G	missense_variant	rs543324204	STAT4	0.000109501	Benign	Likely benign
chr2	191099907	T	G	intron_variant	rs7574865	STAT4		Benign
chr2	203439491	G	A	synonymous_variant	rs2465520	RAPH1	0.109513	Benign
chr2	203440370	T	C	synonymous_variant	rs3814365	RAPH1	0.54923	Benign
chr2	203441389	G	A	missense_variant	rs201774741	RAPH1	0.000475274	Benign
chr2	203442606	G	A	intron_variant		RAPH1		Uncertain_significance
chr2	203444852	A	G	intron_variant	rs767354365	RAPH1	6.17232e-06	Likely_benign
chr2	203457575	T	C	synonymous_variant	rs2469953	RAPH1	0.593771	Benign
chr2	203495273	C	T	missense_variant	rs763483457	RAPH1	3.42046e-06	Uncertain_significance
chr2	216676859	T	C	synonymous_variant	rs2160549	IGFBP5	0.998015	Benign
chr2	216678910	G	A	synonymous_variant	rs11575195	IGFBP5	0.0366861	Benign
chr20	3190691	C	T	missense_variant	rs11591	DDRGK1	0.166174	Benign	Benign
chr20	3191600	A	C	intron_variant	rs2295547	DDRGK1	0.328467	Benign
chr20	6770235	T	G	missense_variant	rs2273073	BMP2	0.0210865	Benign	Benign
chr20	6770387	A	G	synonymous_variant	rs1049007	BMP2	0.637426	Benign	Benign
chr20	6778269	C	T	missense_variant	rs150153389	BMP2	2.14502e-05	Benign	Uncertain significance
chr20	6778468	A	T	missense_variant	rs235768	BMP2	0.634927	Benign	Benign
chr20	6778561	C	T	synonymous_variant	rs757394512	BMP2	2.66782e-05	Benign	Likely benign
chr20	6779059	C	T	synonymous_variant	rs13037675	BMP2	0.0669658	Benign	Benign
chr20	35434398	T	C	synonymous_variant	rs224330	GDF5	0.930811	Benign	Benign
chr20	35434589	C	A	missense_variant	rs224331	GDF5	0.645054	Benign	Benign
chr20	35434874	A	C	intron_variant	rs224332	GDF5	0.927893	Benign
chr20	44727877	A	G	intron_variant	rs1536229	KCNK15-AS1	0.997585	Benign
chr20	44727941	T	G	intron_variant	rs4810435	KCNK15-AS1	0.022158	Benign
chr20	46008985	C	T	missense_variant	rs1805088	MMP9	0.0262141	Benign	Benign/Likely benign
chr20	46009039	A	G	missense_variant	rs41427445	MMP9	0.0113903	Benign	Benign
chr20	46010960	C	T	missense_variant	rs55789927	MMP9	0.00188592	Benign	Benign/Likely benign
chr20	46011586	A	G	missense_variant	rs17576	MMP9	0.370915	Benign	Benign
chr20	46013767	G	C	missense_variant	rs2250889	MMP9	0.929906	Benign	Benign
chr20	46014194	A	C	synonymous_variant	rs13969	MMP9	0.577189	Benign	Benign
chr20	46014472	G	A	missense_variant,splice_region_variant	rs17577	MMP9	0.152885	Benign	Benign
chr20	46016326	G	A	synonymous_variant	rs13925	MMP9	0.148208	Benign	Benign
chr20	47627680	C	T	missense_variant	rs6094752	NCOA3	0.0441864	Benign
chr20	47634097	T	C	synonymous_variant	rs2086467219	NCOA3	6.84067e-07	Likely_benign
chr20	47636144	G	C	missense_variant	rs2230782	NCOA3	0.0826037	Benign
chr20	47636547	G	A	missense_variant	rs202242711	NCOA3	0.000171012	Likely_benign
chr20	47639749	A	G	synonymous_variant	rs2076546	NCOA3	0.0859058	Benign
chr20	47651070	TGCAGCAGCA	T	disruptive_inframe_deletion	rs3830810	NCOA3	0.105143	Benign	Benign
chr20	47651083	G	A	synonymous_variant	rs6018623	NCOA3	0.0947582	Benign
chr20	47651092	ACAG	A	disruptive_inframe_deletion	rs3830809	NCOA3	0.342693	Benign
chr20	47651092	ACAGCAG	A	disruptive_inframe_deletion	rs3830809	NCOA3	0.000367039	Likely_benign
chr20	47651116	G	GCAA	disruptive_inframe_insertion	rs753491875	NCOA3	0.00347555	Benign
chr20	47651122	A	G	synonymous_variant	rs1132443	NCOA3	0.0775031	Benign	Likely benign
chr20	47651174	C	T	missense_variant	rs138733364	NCOA3	0.00130927	Benign
chr20	57171085	C	T	synonymous_variant	rs367729657	BMP7	0.000221632	Benign
chr20	57173150	G	A	intron_variant	rs2148328	BMP7	0.484687	Benign	Benign
chr20	57183873	C	T	synonymous_variant	rs61733436	BMP7	0.0147625	Benign	Benign
chr20	57225881	C	T	intron_variant	rs6070031	BMP7	0.407387	Benign
chr20	57228243	C	T	synonymous_variant	rs41274738	BMP7	0.0353814	Benign	Benign
chr20	57266268	G	A	5_prime_UTR_premature_start_codon_gain_variant	rs113393186	BMP7	0.0221809	Benign	Likely benign
chr20	57266485	G	A	5_prime_UTR_premature_start_codon_gain_variant	rs111477259	BMP7	0.0374982	Benign	Benign
chr20	58840400	C	T	synonymous_variant	rs1800902	GNAS	0.031373	Benign	Benign
chr20	58840643	G	A	synonymous_variant	rs181594534	GNAS	0.000284691	Benign	Likely benign
chr20	58854572	C	A	intron_variant	rs61749698	GNAS	0.0265191	Benign	Benign
chr20	58854641	C	CTGACGCCCCAGCCGATCCCGACTCCGGGGCGGCCCG	intron_variant	rs1196950915	GNAS	0.00940079	Benign	Benign
chr20	58854641	C	G	intron_variant	rs148033592	GNAS	0.0148011	Benign	Likely benign
chr20	58889933	A	C	intron_variant	rs190105273	GNAS		Benign	Benign
chr20	58890110	G	A	intron_variant		GNAS		Likely_benign
chr20	58890124	A	C	intron_variant		GNAS		Likely_benign
chr20	58890182	A	T	intron_variant	rs898479439	GNAS		Likely_benign
chr20	58890197	TGAA	T	intron_variant	rs369104721	GNAS		Benign
chr20	58890223	G	A	intron_variant	rs9679845	GNAS		Benign
chr20	58890281	ACGACGAGGGCGC	A	intron_variant	rs1006794626	GNAS		Uncertain_significance
chr20	58890516	G	A	intron_variant	rs6123837	GNAS	0.432203	Benign
chr20	58903752	C	T	synonymous_variant	rs7121	GNAS	0.494501	Benign	Benign
chr20	62817114	G	A	missense_variant	rs2294984	COL9A3	0.147764	Benign	Benign
chr20	62817577	TCCCCGGCCC	T	disruptive_inframe_deletion	rs544133282	COL9A3	0.00194148	Benign	Benign/Likely benign
chr20	62817617	C	T	synonymous_variant	rs2273079	COL9A3	0.0533713	Benign	Benign
chr20	62819981	G	A	missense_variant,splice_region_variant	rs142639450	COL9A3	0.0150038	Benign	Benign
chr20	62828772	G	A	synonymous_variant	rs2249903	COL9A3	0.159129	Benign	Benign
chr20	62829676	G	A	missense_variant	rs531144768	COL9A3	1.23574e-05	Likely_benign	Uncertain significance
chr20	62832170	C	A	missense_variant	rs751557	COL9A3	0.195047	Benign	Benign
chr20	62836448	A	G	intron_variant	rs760087	COL9A3	0.166113	Benign	Benign
chr20	62837219	T	C	synonymous_variant	rs2294995	COL9A3	0.683975	Benign	Benign
chr20	62838713	G	A	missense_variant	rs142792529	COL9A3	0.0124608	Benign	Benign
chr20	62840595	G	A	missense_variant	rs553583384	COL9A3	0.000434015	Benign	Benign/Likely benign
chr20	62840721	C	A	synonymous_variant	rs1048100	COL9A3	0.0830139	Benign	Benign
chr21	26924070	A	G	synonymous_variant	rs3746839	ADAMTS5	0.0309898	Benign
chr21	26930036	A	G	missense_variant	rs226794	ADAMTS5	0.874312	Benign	Benign
chr21	26932893	C	T	missense_variant	rs2830585	ADAMTS5	0.147043	Benign	Benign
chr21	26943435	C	T	synonymous_variant	rs528381319	ADAMTS5	9.37714e-05	Benign
chr21	26943522	G	A	synonymous_variant	rs61088614	ADAMTS5	0.00748457	Benign
chr21	26965979	C	G	missense_variant	rs457947	ADAMTS5	0.158554	Benign
chr21	26966104	C	G	synonymous_variant	rs55933916	ADAMTS5	0.18358	Benign
chr21	26966262	G	T	missense_variant	rs3746840	ADAMTS5	0.0389876	Benign
chr21	26966657	TA	T	5_prime_UTR_variant	rs34772523	ADAMTS5	0.000849642	Benign
chr22	37128579	G	T	missense_variant	rs228942	IL2RB	0.177731	Benign	Benign
chr22	37128714	G	A	synonymous_variant	rs771604727	IL2RB	6.15662e-06	Likely_benign
chr22	37135396	G	A	synonymous_variant	rs228953	IL2RB	0.431662	Benign	Benign
chr22	40156115	G	A	missense_variant,splice_region_variant	rs9611280	TNRC6B	0.098146	Benign	Benign
chr22	40265677	T	C	missense_variant		TNRC6B		Uncertain_significance
chr22	40301172	TGCA	T	conservative_inframe_deletion	rs139908	TNRC6B	0.245189	Benign
chr22	40301267	C	T	missense_variant	rs369946840	TNRC6B	0.000272215	Benign	Likely benign
chr22	41237212	C	T	synonymous_variant		CHADL	2.14881e-06	Likely_benign
chr22	41238038	T	TCGCCC	frameshift_variant		CHADL	4.44854e-06	Uncertain_significance
chr22	41238083	A	ACGCGCGCC	frameshift_variant	rs532464664	CHADL	0.0189283	Benign
chr22	41239544	C	T	missense_variant	rs371389800	CHADL	0.000179781	Benign
chr3	33153348	G	A	synonymous_variant	rs539349440	SUSD5	0.00028119	Benign
chr3	33153498	C	A	missense_variant	rs6810039	SUSD5	0.442519	Benign
chr3	33153792	G	A	synonymous_variant	rs61743511	SUSD5	0.159016	Benign
chr3	33153817	A	G	missense_variant	rs61743461	SUSD5	0.162378	Benign
chr3	33214100	A	G	missense_variant	rs9637517	SUSD5	0.867094	Benign
chr3	45034729	T	G	intron_variant	rs939311	CLEC3B	0.444444	Benign
chr3	45034816	A	T	intron_variant	rs2372851	CLEC3B		Benign
chr3	45035627	C	T	synonymous_variant	rs11545365	CLEC3B	0.0627938	Benign
chr3	45035631	G	A	missense_variant	rs13963	CLEC3B	0.439832	Benign
chr3	52687289	G	A	missense_variant	rs11177	GNL3	0.379276	Benign
chr3	52693241	G	A	missense_variant	rs2289247	GNL3	0.415825	Benign
chr3	52693419	C	T	missense_variant	rs570446517	GNL3	6.1569e-06	Likely_benign
chr3	52693720	A	G	synonymous_variant	rs4532127	GNL3	0.0298984	Benign
chr3	120670469	T	A	missense_variant	rs2255543	HGD	0.739779	Benign	Benign
chr3	130563539	C	A	missense_variant	rs114511272	COL6A6	0.0162177	Benign
chr3	130565016	C	T	synonymous_variant	rs74824913	COL6A6	0.00448913	Benign
chr3	130565440	G	A	missense_variant	rs9830253	COL6A6	0.808289	Benign	Benign
chr3	130567036	C	T	synonymous_variant	rs112472535	COL6A6	0.0124649	Benign
chr3	130567085	C	T	missense_variant	rs59021909	COL6A6	0.0302216	Benign	Benign
chr3	130574388	T	C	missense_variant	rs200274210	COL6A6	0.00515084	Benign
chr3	130581806	T	C	synonymous_variant	rs6439249	COL6A6	0.84492	Benign
chr3	130592554	C	T	missense_variant	rs73868925	COL6A6	0.0927703	Benign
chr3	130599777	C	A	synonymous_variant	rs112135798	COL6A6	0.00559463	Benign	Benign
chr3	130638404	A	C	intron_variant	rs58456232	COL6A6		Benign
chr3	130641683	C	T	missense_variant	rs61629992	COL6A6	0.0744676	Benign
chr3	130643012	G	A	missense_variant	rs16830494	COL6A6	0.106359	Benign
chr3	130649225	A	G	missense_variant	rs7614116	COL6A6	0.334117	Benign	Benign
chr3	130649457	G	A	synonymous_variant	rs7636656	COL6A6	0.120978	Benign	Benign
chr3	130661831	C	T	missense_variant	rs374436074	COL6A6	0.000376972	Benign	Likely benign
chr3	130662135	G	A	missense_variant	rs756487090	COL6A6	8.20965e-06	Uncertain_significance
chr3	130662215	T	G	missense_variant	rs557527574	COL6A6	4.24165e-05	Likely_benign
chr4	1699590	G	A	synonymous_variant	rs2247341	SLBP	0.355882	Benign
chr4	1799273	C	T	synonymous_variant	rs761218109	FGFR3	3.62949e-05	Likely_benign
chr4	1799344	G	A	missense_variant	rs369232922	FGFR3	0.000148606	Benign	Conflicting classifications of pathogenicity
chr4	1799784	C	T	synonymous_variant	rs3135867	FGFR3	0.0441393	Benign	Benign
chr4	1801977	T	C	synonymous_variant	rs2234909	FGFR3	0.150674	Benign	Benign
chr4	1804844	G	A	synonymous_variant	rs187229103	FGFR3	0.000240404	Benign	Benign
chr4	1804968	C	T	missense_variant,splice_region_variant	rs533045918	FGFR3	7.66446e-05	Uncertain_significance	Uncertain significance
chr4	1806167	G	A	synonymous_variant	rs7688609	FGFR3	0.995925	Benign	Benign
chr4	38773164	A	G	synonymous_variant	rs10776482	TLR10	0.2113	Benign
chr4	38773195	C	T	missense_variant	rs4129008	TLR10	0.00351503	Benign	Likely benign
chr4	38773268	T	C	missense_variant	rs4129009	TLR10	0.164271	Benign
chr4	38773419	A	G	synonymous_variant	rs10776483	TLR10	0.214163	Benign
chr4	38774018	G	A	missense_variant	rs11466658	TLR10	0.0270189	Benign
chr4	38774486	T	G	missense_variant	rs11096955	TLR10	0.35128	Benign
chr4	38774559	C	A	synonymous_variant	rs11096956	TLR10	0.212344	Benign
chr4	38774614	A	G	missense_variant	rs11466653	TLR10	0.0408989	Benign
chr4	38774682	T	C	synonymous_variant	rs11466652	TLR10	0.13746	Benign
chr4	38774699	C	T	missense_variant	rs11466651	TLR10	0.0410789	Benign
chr4	38774870	T	G	missense_variant	rs11096957	TLR10	0.35222	Benign
chr4	38775104	C	A	missense_variant	rs11466649	TLR10	0.042783	Benign
chr4	38775438	C	T	synonymous_variant	rs10856837	TLR10	0.0481968	Benign
chr4	38775530	C	G	missense_variant		TLR10	1.36817e-06	Uncertain_significance
chr4	38775552	A	T	synonymous_variant	rs10856838	TLR10	0.182239	Benign
chr4	76179607	G	A	synonymous_variant	rs375051752	SCARB2	3.14718e-05	Benign	Likely benign
chr4	76180225	A	C	intron_variant	rs1470194	SCARB2	0.0974871	Benign
chr4	76184758	A	G	intron_variant	rs72857048	SCARB2	0.0628999	Benign
chr4	174490230	G	A	3_prime_UTR_variant	rs2612691	HPGD	0.779412	Benign	Benign
chr4	174522005	C	T	synonymous_variant	rs1050145	HPGD	0.410897	Benign	Benign
chr4	185402287	A	T	intron_variant	rs551257120	UFSP2	0.00260308	Benign
chr4	185402294	A	G	intron_variant	rs6823895	UFSP2	0.0545554	Benign
chr4	185415311	T	C	synonymous_variant	rs2289722	UFSP2	0.035135	Benign
chr4	185418466	T	C	missense_variant	rs61735474	UFSP2	0.0214608	Benign
chr5	14705284	T	TA	3_prime_UTR_variant	rs765143871	ANKH		Likely_benign	Uncertain significance
chr5	14705284	TA	T	3_prime_UTR_variant	rs765143871	ANKH		Likely_benign	Uncertain significance
chr5	14709303	A	AT	3_prime_UTR_variant	rs34294961	ANKH		Benign	Benign
chr5	14741875	T	C	synonymous_variant	rs2288474	ANKH	0.0516261	Benign	Benign
chr5	14741894	G	A	missense_variant	rs559321861	ANKH	4.10442e-05	Likely_benign	Uncertain significance
chr5	14768340	C	T	intron_variant	rs12493	ANKH	0.144951	Benign
chr5	14768994	G	A	synonymous_variant	rs17251667	ANKH	0.182773	Benign	Benign
chr5	42646346	T	A	intron_variant	rs79362852	GHR	0.0703906	Benign
chr5	42699942	A	G	synonymous_variant	rs6179	GHR	0.719684	Benign	Benign
chr5	42699980	T	C	missense_variant	rs773036164	GHR	7.61686e-06	Likely_benign
chr5	42718502	A	G	missense_variant	rs540473875	GHR	0.000180094	Benign	Benign
chr5	42718826	G	T	missense_variant	rs6182	GHR	0.0229628	Benign	Benign
chr5	42718980	C	T	synonymous_variant	rs6176	GHR	0.0238955	Benign	Benign
chr5	42719137	A	C	missense_variant	rs6180	GHR	0.448953	Benign	Benign
chr5	42719242	C	A	missense_variant	rs6184	GHR	0.0229591	Benign	Benign
chr5	56111125	T	C	synonymous_variant	rs321775	ANKRD55	0.257724	Benign
chr5	56111715	C	T	missense_variant	rs321776	ANKRD55	0.257054	Benign
chr5	56116709	T	C	missense_variant	rs762181145	ANKRD55	7.25168e-05	Likely_benign
chr5	83644385	G	A	synonymous_variant	rs141242336	HAPLN1	0.000892223	Likely_benign
chr5	83644454	C	G	synonymous_variant	rs2242128	HAPLN1	0.684906	Benign
chr5	149977881	A	C	missense_variant	rs76784312	SLC26A2	0.00230596	Benign	Conflicting classifications of pathogenicity
chr5	149981003	A	G	synonymous_variant	rs115777661	SLC26A2	0.00219315	Benign	Benign/Likely benign
chr5	149981240	A	G	synonymous_variant	rs200694484	SLC26A2	0.000489789	Benign	Benign/Likely benign
chr5	149981314	T	C	missense_variant	rs30832	SLC26A2	0.98964	Benign	Benign
chr5	149981658	A	T	missense_variant	rs3776070	SLC26A2	0.147607	Benign	Benign/Likely benign
chr5	149983021	T	TA	3_prime_UTR_variant	rs886060233	SLC26A2		Uncertain_significance	Uncertain significance
chr5	149983021	TA	T	3_prime_UTR_variant	rs886060233	SLC26A2		Uncertain_significance	Uncertain significance
chr5	149984289	T	C	3_prime_UTR_variant	rs570682108	SLC26A2		Likely_benign	Conflicting classifications of pathogenicity
chr5	149985038	T	C	3_prime_UTR_variant	rs144502932	SLC26A2		Likely_benign	Uncertain significance
chr5	149986273	GT	G	3_prime_UTR_variant	rs397883627	SLC26A2		Benign	Benign
chr6	21594616	C	G	missense_variant	rs140231408	SOX4	0.00883551	Benign	Benign
chr6	21595197	AGGC	A	disruptive_inframe_deletion	rs552547778	SOX4	0.000110734	Likely_benign	Benign
chr6	21595239	C	T	synonymous_variant	rs1018043511	SOX4	2.9186e-05	Benign
chr6	21595506	G	A	synonymous_variant	rs776896372	SOX4	6.95156e-05	Benign
chr6	29942559	C	G	synonymous_variant	rs113772324	HLA-A	0.0857467	Benign
chr6	29942563	A	G	missense_variant	rs79326316	HLA-A	0.0867691	Benign
chr6	29942581	C	G	missense_variant	rs1143146	HLA-A	0.0560325	Benign
chr6	29942594	CG	C	frameshift_variant	rs41548119	HLA-A	4.98845e-06	Likely_benign
chr6	29942601	C	T	synonymous_variant	rs41546314	HLA-A	0.0119094	Benign
chr6	29942625	G	A	splice_region_variant,synonymous_variant	rs1136656	HLA-A	0.0136894	Benign
chr6	29942761	C	T	synonymous_variant	rs1136657	HLA-A	0.00949592	Benign
chr6	29942780	T	A	missense_variant	rs1136659	HLA-A	0.0186137	Benign
chr6	29942781	T	A	missense_variant	rs2075684	HLA-A	0.158343	Benign
chr6	29942781	T	C	missense_variant	rs2075684	HLA-A	0.127695	Benign
chr6	29942785	A	C	synonymous_variant	rs1059418	HLA-A	0.119172	Benign
chr6	29942785	A	T	synonymous_variant	rs1059418	HLA-A	0.0325773	Benign
chr6	29942804	C	A	missense_variant	rs1059423	HLA-A	0.0584929	Benign
chr6	29942806	C	T	synonymous_variant	rs1059426	HLA-A	0.0575926	Benign
chr6	29942809	G	A	synonymous_variant	rs12721672	HLA-A	0.0559278	Benign
chr6	29942825	G	T	missense_variant	rs41552219	HLA-A	0.0107522	Likely_benign
chr6	29942827	C	A	synonymous_variant	rs12721675	HLA-A	0.0904768	Benign
chr6	29942830	G	C	synonymous_variant	rs72555397	HLA-A	0.0256739	Benign
chr6	29942845	C	T	synonymous_variant	rs199501996	HLA-A	0.0792511	Benign
chr6	29942886	G	A	missense_variant	rs707910	HLA-A	0.160955	Benign
chr6	29942902	G	A	synonymous_variant	rs199474404	HLA-A	0.00659583	Benign
chr6	29942911	A	G	missense_variant	rs41544012	HLA-A	0.18544	Benign
chr6	29942916	A	G	missense_variant	rs41559716	HLA-A	0.130606	Benign
chr6	29942922	G	A	missense_variant	rs1059451	HLA-A	0.0363405	Benign
chr6	29942923	G	T	synonymous_variant	rs1059452	HLA-A	0.0645409	Benign
chr6	29942939	C	G	missense_variant	rs1059455	HLA-A	0.175949	Benign
chr6	29942940	A	G	missense_variant	rs1064588	HLA-A	0.270427	Benign
chr6	29942940	A	T	missense_variant	rs1064588	HLA-A	0.0237769	Benign
chr6	29942942	G	A	missense_variant	rs2230991	HLA-A	0.121267	Benign
chr6	29942942	G	C	missense_variant	rs2230991	HLA-A	0.0547992	Benign
chr6	29942944	G	C	missense_variant	rs199474424	HLA-A	0.122332	Benign
chr6	29942945	A	G	missense_variant	rs199474425	HLA-A	0	Uncertain_significance
chr6	29942948	C	G	missense_variant	rs199474430	HLA-A	0.0908525	Benign
chr6	29942953	T	A	missense_variant	rs199474436	HLA-A	0.178751	Benign
chr6	29942954	G	A	missense_variant	rs79361534	HLA-A	0.182635	Likely_benign
chr6	29942965	G	C	missense_variant	rs78306866	HLA-A	0.599236	Benign
chr6	29942973	C	T	missense_variant	rs199474457	HLA-A	0.0750443	Benign
chr6	29942982	T	A	missense_variant	rs1071742	HLA-A	0.158905	Benign
chr6	29942982	T	C	missense_variant	rs1071742	HLA-A	0.229656	Benign
chr6	29942984	G	A	missense_variant	rs1136688	HLA-A	0.407429	Benign
chr6	29943024	C	A	missense_variant,splice_region_variant	rs1136692	HLA-A	0.332005	Benign
chr6	29943279	A	C	missense_variant	rs1071743	HLA-A	0.0133532	Uncertain_significance
chr6	29943287	A	G	missense_variant	rs1136695	HLA-A	0.140055	Benign
chr6	29943292	A	T	missense_variant	rs1136697	HLA-A	0.0102469	Benign
chr6	29943300	G	C	missense_variant	rs199474490	HLA-A	0.00440578	Benign
chr6	29943309	T	C	missense_variant	rs1136700	HLA-A	0.258415	Benign
chr6	29943317	G	T	synonymous_variant	rs41561714	HLA-A	1.22999e-06	Likely_benign
chr6	29943337	G	A	missense_variant	rs3173420	HLA-A	0.0654628	Benign
chr6	29943338	G	C	synonymous_variant	rs1059498	HLA-A	0.0131875	Benign
chr6	29943342	G	T	missense_variant	rs3173419	HLA-A	0.0129189	Benign
chr6	29943372	C	T	synonymous_variant	rs1059506	HLA-A	0.101827	Benign
chr6	29943377	C	A	missense_variant	rs1059509	HLA-A	0.0780767	Benign
chr6	29943387	C	A	missense_variant	rs41552413	HLA-A	9.11285e-06	Likely_benign
chr6	29943392	T	C	synonymous_variant	rs41551213	HLA-A	4.17074e-05	Benign
chr6	29943409	T	C	missense_variant	rs41549316	HLA-A	3.35894e-05	Likely_benign
chr6	29943411	G	A	missense_variant	rs61760918	HLA-A	2.4111e-06	Uncertain_significance
chr6	29943413	G	A	synonymous_variant	rs1059514	HLA-A	0.298936	Benign
chr6	29943421	T	C	missense_variant	rs1059516	HLA-A	0.0340466	Benign
chr6	29943422	C	T	synonymous_variant	rs41559615	HLA-A	0.00254202	Likely_benign
chr6	29943426	A	C	missense_variant	rs1059517	HLA-A	0.199132	Benign
chr6	29943430	G	A	missense_variant	rs1059520	HLA-A	0.0307643	Benign
chr6	29943444	G	C	missense_variant		HLA-A	0	Uncertain_significance
chr6	29943445	C	T	missense_variant	rs1059535	HLA-A	0.131884	Benign
chr6	29943448	A	G	missense_variant	rs1059536	HLA-A	0.140435	Benign
chr6	29943451	A	C	missense_variant	rs9256983	HLA-A	0.206184	Benign
chr6	29943451	A	T	missense_variant	rs9256983	HLA-A	0.156689	Benign
chr6	29943462	T	C	synonymous_variant	rs9260155	HLA-A	0.378902	Benign
chr6	29943463	T	A	stop_gained	rs9260156	HLA-A	0.242368	Benign
chr6	29943463	T	G	missense_variant	rs9260156	HLA-A	0.165842	Benign
chr6	29943466	G	C	missense_variant	rs41551921	HLA-A	0.00151152	Benign
chr6	29943469	C	T	missense_variant	rs9260157	HLA-A	0.119972	Benign
chr6	29943479	T	G	missense_variant	rs1059542	HLA-A	0.67255	Benign
chr6	29943483	A	C	missense_variant	rs543623321	HLA-A	0.192991	Benign
chr6	29943484	C	G	missense_variant	rs3129017	HLA-A	0.198721	Benign
chr6	29943494	G	C	missense_variant	rs879577815	HLA-A	0.0918495	Benign
chr6	29943495	T	A	missense_variant	rs3098019	HLA-A	0.0175985	Benign
chr6	29943495	T	G	missense_variant	rs3098019	HLA-A	0.0917298	Benign
chr6	29943530	G	A	synonymous_variant	rs199474578	HLA-A	0.0329928	Benign
chr6	29943542	G	T	splice_region_variant,synonymous_variant	rs41554520	HLA-A	0.348676	Likely_benign
chr6	29944147	C	T	synonymous_variant	rs45520243	HLA-A	0.00012234	Benign
chr6	29944148	C	T	missense_variant	rs77235917	HLA-A	0.06105	Benign
chr6	29944174	C	T	synonymous_variant	rs1059570	HLA-A	0.0529538	Benign
chr6	29944180	G	A	synonymous_variant	rs12721755	HLA-A	0.0540145	Benign
chr6	29944246	G	C	missense_variant	rs138704952	HLA-A	0.000401247	Benign
chr6	29944251	AG	A	frameshift_variant	rs45576436	HLA-A	0.344228	Uncertain_significance
chr6	29944253	G	C	missense_variant	rs145046067	HLA-A	0.366396	Likely_benign
chr6	29944264	C	T	synonymous_variant	rs9260181	HLA-A	0.0557845	Benign
chr6	29944265	G	A	missense_variant	rs150028516	HLA-A	0.140206	Likely_benign
chr6	29944308	C	T	missense_variant	rs148794540	HLA-A	0.00128156	Benign
chr6	29944309	G	A	synonymous_variant	rs199474634	HLA-A	0.0492032	Benign
chr6	29944310	G	T	missense_variant	rs1059632	HLA-A	0.0715557	Likely_benign
chr6	29944321	G	A	synonymous_variant	rs1059638	HLA-A	0.0467397	Benign
chr6	29944331	G	C	missense_variant	rs2231095	HLA-A	0.158192	Benign
chr6	29944370	C	T	synonymous_variant	rs1059686	HLA-A	0.112267	Benign
chr6	29944372	G	C	synonymous_variant	rs114818671	HLA-A	0.019859	Benign
chr6	29944503	T	C	missense_variant	rs1136903	HLA-A	0.161139	Benign
chr6	29944504	G	A	synonymous_variant	rs1136917	HLA-A	0.0406336	Benign
chr6	29944520	A	G	missense_variant	rs1136949	HLA-A	0.0425999	Benign
chr6	29944538	A	C	missense_variant	rs41554316	HLA-A	0.0443344	Benign
chr6	29944556	C	T	missense_variant	rs3179982	HLA-A	0.0610077	Benign
chr6	29944571	A	G	missense_variant	rs1137078	HLA-A	0.044735	Benign
chr6	29944591	C	T	synonymous_variant	rs1141891	HLA-A	0.120146	Likely_benign
chr6	29944609	G	C	missense_variant	rs1137160	HLA-A	0.0427844	Benign
chr6	29944621	A	G	splice_region_variant,intron_variant	rs9260191	HLA-A	0.0479864	Likely_benign
chr6	29944633	G	A	intron_variant	rs41551619	HLA-A	0.137232	Benign
chr6	29945075	T	C	synonymous_variant	rs1137296	HLA-A	0.148157	Benign
chr6	29945079	A	T	missense_variant	rs2231119	HLA-A	0.145983	Benign
chr6	29945265	C	T	synonymous_variant	rs14288	HLA-A	0.723421	Benign
chr6	31269077	T	C	3_prime_UTR_variant	rs1049709	HLA-C	0.136778	Benign
chr6	31269347	T	C	missense_variant	rs1130838	HLA-C	0.0923324	Likely_benign
chr6	31269385	C	G	missense_variant,splice_region_variant	rs35708511	HLA-C	0.0532057	Likely_benign
chr6	31269498	G	A	missense_variant	rs41559915	HLA-C	0.0248978	Benign
chr6	31269989	A	T	missense_variant	rs41542414	HLA-C	0.0131924	Benign
chr6	31269993	CGGT	C	conservative_inframe_deletion	rs1761164088	HLA-C	0	Uncertain_significance
chr6	31269994	G	A	synonymous_variant	rs1050106	HLA-C	0.000104144	Likely_benign
chr6	31269996	T	C	missense_variant	rs1130947	HLA-C	9.49428e-05	Likely_benign
chr6	31270009	A	G	synonymous_variant	rs41556617	HLA-C	0	Likely_benign
chr6	31270009	A	T	synonymous_variant	rs41556617	HLA-C	0.000208384	Likely_benign
chr6	31270014	CAGCTAG	C	conservative_inframe_deletion	rs1265289081	HLA-C		Uncertain_significance
chr6	31270025	A	G	missense_variant	rs1050147	HLA-C	0.000170635	Likely_benign
chr6	31270027	C	CT	frameshift_variant		HLA-C	0	Uncertain_significance
chr6	31270048	G	A	synonymous_variant	rs45486697	HLA-C	1.55691e-05	Likely_benign
chr6	31270056	T	C	missense_variant	rs1050180	HLA-C	0.000258878	Likely_benign
chr6	31270069	G	A	synonymous_variant	rs11757919	HLA-C	0.0142643	Benign
chr6	31270071	G	A	missense_variant	rs45485294	HLA-C	7.78265e-06	Likely_benign
chr6	31270081	T	C	synonymous_variant	rs34794906	HLA-C	0.000173076	Likely_benign
chr6	31270214	G	T	missense_variant	rs2308628	HLA-C	0.00469165	Benign
chr6	31270232	T	C	synonymous_variant	rs1131014	HLA-C	0.00498073	Benign
chr6	31270233	T	G	missense_variant	rs1131015	HLA-C	0.000243364	Likely_benign
chr6	31270252	T	C	missense_variant	rs2308622	HLA-C	0.0072953	Benign
chr6	31270276	G	C	missense_variant	rs707908	HLA-C	0.00188138	Likely_benign
chr6	31270281	G	T	missense_variant		HLA-C	0	Likely_benign
chr6	31270291	C	T	missense_variant	rs1050276	HLA-C	0.00129921	Benign
chr6	31270298	T	C	synonymous_variant	rs1323498643	HLA-C	8.40447e-06	Likely_benign
chr6	31270299	G	A	missense_variant	rs79767529	HLA-C	5.99334e-06	Likely_benign
chr6	31270328	T	A	synonymous_variant	rs1489167433	HLA-C	3.63552e-05	Likely_benign
chr6	31270343	A	G	synonymous_variant	rs1449752799	HLA-C	1.05519e-05	Likely_benign
chr6	31270346	C	T	synonymous_variant	rs1761215807	HLA-C	2.39825e-06	Likely_benign
chr6	31270349	G	C	synonymous_variant	rs2308618	HLA-C	0.000153225	Likely_benign
chr6	31270358	G	A	synonymous_variant	rs1050317	HLA-C	0.0492834	Benign
chr6	31270361	C	T	synonymous_variant	rs1050320	HLA-C	0.0497247	Benign
chr6	31270370	C	G	synonymous_variant	rs1050326	HLA-C	0.0155944	Likely_benign
chr6	31270378	G	A	missense_variant	rs1050328	HLA-C	0.015131	Likely_benign
chr6	31270380	T	A	missense_variant		HLA-C	2.29569e-06	Uncertain_significance
chr6	31270453	G	C	missense_variant	rs1050716	HLA-C	0.0253816	Benign
chr6	31270457	G	A	synonymous_variant	rs1050344	HLA-C	0.0212169	Benign
chr6	31270482	G	T	missense_variant	rs1131096	HLA-C	0.0098973	Likely_benign
chr6	31270484	T	G	missense_variant,splice_region_variant	rs41547620	HLA-C	0.0118187	Likely_benign
chr6	31271074	T	C	splice_region_variant,synonymous_variant	rs2308604	HLA-C	0.124386	Benign
chr6	31271091	C	T	missense_variant	rs1131103	HLA-C	0.0339985	Benign
chr6	31271133	T	C	missense_variant	rs1050685	HLA-C	0.00614968	Benign
chr6	31271146	G	T	synonymous_variant		HLA-C	1.10239e-05	Likely_benign
chr6	31271150	C	CTG	frameshift_variant		HLA-C	0	Uncertain_significance
chr6	31271151	TCA	T	frameshift_variant	rs766416978	HLA-C	0.0313923	Benign
chr6	31271152	C	G	synonymous_variant	rs780586514	HLA-C	0	Likely_benign
chr6	31271152	CAG	C	frameshift_variant		HLA-C	2.15725e-06	Uncertain_significance
chr6	31271153	A	C	missense_variant	rs2308592	HLA-C	0.0574352	Benign
chr6	31271153	A	T	missense_variant	rs2308592	HLA-C	0.105947	Benign
chr6	31271154	G	A	synonymous_variant	rs697743	HLA-C	0.0297525	Likely_benign
chr6	31271154	G	C	missense_variant	rs697743	HLA-C	1.06861e-06	Uncertain_significance
chr6	31271154	G	GTC	frameshift_variant	rs779505818	HLA-C	0.0340181	Benign
chr6	31271159	T	C	missense_variant		HLA-C	3.21148e-06	Likely_benign
chr6	31271162	G	A	missense_variant	rs281860513	HLA-C	6.45039e-06	Uncertain_significance
chr6	31271165	G	A	missense_variant	rs2308590	HLA-C	0.00415469	Benign
chr6	31271165	G	T	missense_variant	rs2308590	HLA-C	0.0822572	Benign
chr6	31271166	C	T	missense_variant	rs41552817	HLA-C	0.00693729	Benign
chr6	31271180	A	C	missense_variant	rs1050366	HLA-C	0.226185	Benign
chr6	31271203	C	T	synonymous_variant	rs281860496	HLA-C	9.77211e-05	Likely_benign
chr6	31271206	G	C	synonymous_variant	rs2308585	HLA-C	0.134994	Benign
chr6	31271207	G	A	missense_variant	rs2308584	HLA-C	0.000392594	Likely_benign
chr6	31271215	G	A	synonymous_variant	rs41550715	HLA-C	0.00528327	Benign
chr6	31271215	G	C	synonymous_variant	rs41550715	HLA-C	0.010936	Likely_benign
chr6	31271218	G	A	synonymous_variant	rs41553316	HLA-C	0.0253064	Benign
chr6	31271224	G	A	synonymous_variant	rs281860491	HLA-C	0.000208388	Likely_benign
chr6	31271229	G	T	missense_variant	rs76907552	HLA-C	0.0070091	Likely_benign
chr6	31271233	G	A	synonymous_variant	rs1050371	HLA-C	0.0186411	Benign
chr6	31271272	G	T	synonymous_variant	rs1065406	HLA-C	0.00679665	Benign
chr6	31271273	G	A	missense_variant	rs713032	HLA-C	0.0491945	Benign
chr6	31271273	G	T	missense_variant	rs713032	HLA-C	0.0355799	Benign
chr6	31271283	A	G	missense_variant	rs2308574	HLA-C	0.00887132	Benign
chr6	31271304	C	T	missense_variant	rs41544015	HLA-C	1.87566e-06	Uncertain_significance
chr6	31271305	G	C	synonymous_variant	rs1050384	HLA-C	0.0072938	Likely_benign
chr6	31271313	G	C	missense_variant	rs34592426	HLA-C	0.00835441	Benign
chr6	31271323	A	G	synonymous_variant	rs1554181495	HLA-C	0.0393259	Benign
chr6	31271324	G	A	missense_variant	rs1131115	HLA-C	0.0282283	Benign
chr6	31271324	G	C	missense_variant	rs1131115	HLA-C	0.0310421	Benign
chr6	31271324	G	T	missense_variant	rs1131115	HLA-C	0.62024	Benign
chr6	31271331	T	A	missense_variant	rs1131118	HLA-C	0.172906	Benign
chr6	31271337	G	A	missense_variant	rs1071649	HLA-C	0.0348943	Benign
chr6	31271337	G	T	missense_variant	rs1071649	HLA-C	0.00933828	Benign
chr6	31271339	G	A	missense_variant	rs1131119	HLA-C	0.00954794	Benign
chr6	31271599	C	T	missense_variant,splice_region_variant	rs1131122	HLA-C	0.00328263	Likely_benign
chr6	31271601	T	G	missense_variant,splice_region_variant	rs1131123	HLA-C	0.15476	Benign
chr6	31271603	C	T	synonymous_variant	rs281860434	HLA-C	2.57416e-06	Likely_benign
chr6	31271623	C	G	missense_variant	rs281860423	HLA-C	2.70852e-06	Likely_benign
chr6	31271630	G	T	missense_variant	rs17408553	HLA-C	0.188141	Benign
chr6	31271631	T	A	missense_variant	rs281860419	HLA-C	0	Likely_benign
chr6	31271640	C	T	missense_variant	rs2308557	HLA-C	0.193279	Benign
chr6	31271643	A	T	missense_variant	rs41550619	HLA-C	0.00369499	Benign
chr6	31271646	C	A	missense_variant	rs11547351	HLA-C	0.00302234	Likely_benign
chr6	31271652	G	A	missense_variant	rs539016289	HLA-C	0.00258947	Benign
chr6	31271653	C	T	missense_variant	rs41543814	HLA-C	0.0885902	Benign
chr6	31271660	C	G	missense_variant	rs1396213802	HLA-C	0.00233593	Likely_benign
chr6	31271662	G	T	missense_variant	rs76638752	HLA-C	0.00233372	Likely_benign
chr6	31271664	C	G	missense_variant	rs45609431	HLA-C	0.00238333	Benign
chr6	31271665	G	T	missense_variant	rs74972087	HLA-C	0.0023249	Benign
chr6	31271670	T	G	missense_variant	rs747530395	HLA-C	0.0022462	Benign
chr6	31271672	C	G	missense_variant	rs28626310	HLA-C	0.183653	Benign
chr6	31271673	T	A	missense_variant	rs1255775232	HLA-C	0.0024198	Benign
chr6	31271677	G	C	missense_variant	rs281860398	HLA-C	0.00453269	Benign
chr6	31271683	C	G	missense_variant	rs1065385	HLA-C	0.00935637	Benign
chr6	31271703	C	T	missense_variant	rs41540214	HLA-C	0.00834608	Benign
chr6	31271716	C	T	missense_variant	rs1065382	HLA-C	0.00749391	Benign
chr6	31271724	G	T	missense_variant	rs1050409	HLA-C	0.063645	Benign
chr6	31271729	C	G	synonymous_variant	rs1050414	HLA-C	0.123213	Benign
chr6	31271735	C	CAT	frameshift_variant	rs765603264	HLA-C	0.00639168	Likely_benign
chr6	31271740	TC	T	frameshift_variant		HLA-C	0.00640593	Likely_benign
chr6	31271741	C	T	synonymous_variant	rs1050420	HLA-C	0.156722	Benign
chr6	31271743	GA	G	frameshift_variant		HLA-C	0.00648981	Likely_benign
chr6	31271800	A	C	missense_variant	rs707911	HLA-C	0.305757	Benign
chr6	31271808	C	T	missense_variant	rs1050437	HLA-C	0.113823	Benign
chr6	31271816	T	C	synonymous_variant	rs41542719	HLA-C	0.157926	Benign
chr6	31271825	G	A	synonymous_variant	rs281860336	HLA-C	0.0402704	Benign
chr6	31271830	G	A	missense_variant	rs41542423	HLA-C	0.0269795	Benign
chr6	31271837	G	A	synonymous_variant	rs1050444	HLA-C	0.0953185	Benign
chr6	31271839	C	A	missense_variant	rs1050445	HLA-C	0.0749611	Benign
chr6	31271840	G	T	synonymous_variant	rs1050446	HLA-C	0.0737783	Benign
chr6	31271844	T	A	missense_variant	rs1071650	HLA-C	0.035438	Benign
chr6	31271845	C	A	missense_variant	rs9264668	HLA-C	0.305846	Benign	Benign
chr6	31271853	C	T	missense_variant	rs1131151	HLA-C	0.0301383	Benign
chr6	31271999	A	C	missense_variant,splice_region_variant	rs2074493	HLA-C	0.0727215	Benign
chr6	31272025	C	G	missense_variant	rs1050451	HLA-C	0.290008	Benign
chr6	31272044	G	T	missense_variant	rs2308527	HLA-C	0.234552	Benign
chr6	31272050	C	T	missense_variant	rs2308525	HLA-C	0.249137	Benign
chr6	31354522	G	A	synonymous_variant	rs569814975	HLA-B	1.95118e-05	Benign
chr6	31354526	C	G	missense_variant,splice_region_variant	rs2308655	HLA-B	0.131247	Benign
chr6	31354663	C	T	missense_variant,splice_region_variant	rs1282028277	HLA-B	0	Likely_benign
chr6	31355111	A	G	synonymous_variant	rs1140546	HLA-B	0.360979	Benign
chr6	31355134	C	T	missense_variant	rs1051488	HLA-B	0.0406842	Benign
chr6	31355185	C	T	missense_variant	rs1766809255	HLA-B	2.58581e-06	Likely_benign
chr6	31355186	A	G	synonymous_variant	rs559553123	HLA-B	6.08251e-06	Likely_benign
chr6	31355203	C	T	missense_variant	rs1131500	HLA-B	0.0258669	Benign
chr6	31355210	C	T	synonymous_variant	rs1140487	HLA-B	0.0411324	Benign
chr6	31355219	C	T	synonymous_variant	rs1130992	HLA-B	0.185901	Benign
chr6	31355339	C	T	synonymous_variant	rs1131446	HLA-B	0.0362004	Benign
chr6	31355455	CAG	C	frameshift_variant		HLA-B	0	Uncertain_significance
chr6	31355456	A	G	synonymous_variant	rs709052	HLA-B	0.358609	Likely_benign
chr6	31355459	G	C	missense_variant	rs753152706	HLA-B		Uncertain_significance
chr6	31355459	G	GCC	frameshift_variant		HLA-B	0	Uncertain_significance
chr6	31355462	C	T	synonymous_variant	rs1467773391	HLA-B	0	Likely_benign
chr6	31355466	G	A	missense_variant	rs758936770	HLA-B	0	Likely_benign
chr6	31355490	C	T	stop_gained	rs1369055141	HLA-B	6.95019e-07	Uncertain_significance	Pathogenic
chr6	31355491	A	G	missense_variant	rs1322740343	HLA-B	6.95416e-07	Uncertain_significance
chr6	31355497	G	C	missense_variant	rs151341350	HLA-B	2.09206e-06	Likely_benign
chr6	31355508	G	A	missense_variant	rs41553413	HLA-B	2.18351e-05	Likely_benign
chr6	31355519	A	G	synonymous_variant	rs1050747	HLA-B	0.846314	Likely_benign
chr6	31355520	C	A	missense_variant	rs1250767327	HLA-B	1.46009e-06	Uncertain_significance
chr6	31355524	G	T	missense_variant		HLA-B	0	Likely_benign
chr6	31355532	C	A	missense_variant	rs1190175698	HLA-B	1.46904e-06	Uncertain_significance
chr6	31355544	G	A	missense_variant	rs1050723	HLA-B	0.0874355	Benign
chr6	31355555	A	G	synonymous_variant	rs1214027557	HLA-B	2.25091e-06	Likely_benign
chr6	31355560	T	C	missense_variant	rs1050341	HLA-B	0.161488	Benign
chr6	31355564	G	C	missense_variant	rs281864639	HLA-B	1.51207e-06	Likely_benign
chr6	31355572	T	A	missense_variant	rs1288098458	HLA-B	7.5876e-07	Likely_benign
chr6	31355575	C	T	missense_variant	rs1428341966	HLA-B	1.51588e-06	Likely_benign
chr6	31355576	G	A	synonymous_variant	rs2257269	HLA-B	0.244369	Benign
chr6	31355591	G	A	splice_region_variant,synonymous_variant	rs746030903	HLA-B	1.55353e-06	Likely_benign
chr6	31356168	A	C	splice_region_variant,synonymous_variant	rs2596493	HLA-B	0.72973	Likely_benign
chr6	31356170	C	T	missense_variant	rs41562214	HLA-B	1.94664e-06	Likely_benign
chr6	31356176	C	G	missense_variant	rs1131285	HLA-B	0.599347	Likely_benign
chr6	31356181	T	G	missense_variant	rs1131279	HLA-B	0.689713	Likely_benign
chr6	31356183	G	C	missense_variant	rs1131275	HLA-B	0.548065	Likely_benign
chr6	31356226	T	A	missense_variant	rs2308466	HLA-B	0.23084	Benign
chr6	31356226	T	C	missense_variant	rs2308466	HLA-B	8.53934e-05	Uncertain_significance
chr6	31356226	T	G	missense_variant	rs2308466	HLA-B	0.332875	Benign
chr6	31356227	C	G	missense_variant	rs2523600	HLA-B	0.228901	Benign
chr6	31356227	C	T	missense_variant	rs2523600	HLA-B	0.33118	Benign
chr6	31356245	TCC	T	frameshift_variant	rs766450595	HLA-B	0.103252	Benign	Benign
chr6	31356246	CCG	C	frameshift_variant	rs376871308	HLA-B	2.25796e-06	Uncertain_significance
chr6	31356247	C	A	missense_variant	rs697742	HLA-B	0.352567	Benign
chr6	31356247	C	T	missense_variant	rs697742	HLA-B	0.0176437	Benign
chr6	31356248	G	A	missense_variant	rs9266144	HLA-B	0.128591	Benign
chr6	31356248	G	GTC	frameshift_variant	rs200488894	HLA-B	0.102924	Benign	Benign
chr6	31356248	G	T	synonymous_variant	rs9266144	HLA-B	8.39803e-07	Likely_benign	Likely benign
chr6	31356259	T	A	missense_variant	rs151341293	HLA-B	0.300756	Benign
chr6	31356259	T	G	missense_variant	rs151341293	HLA-B	0.0324102	Benign
chr6	31356260	C	T	missense_variant	rs41547815	HLA-B	0.000913882	Likely_benign
chr6	31356262	C	T	missense_variant	rs41553417	HLA-B	0.00024283	Benign
chr6	31356284	G	T	missense_variant	rs151341280	HLA-B	6.47766e-05	Likely_benign
chr6	31356297	C	T	synonymous_variant	rs41562716	HLA-B	0.000283942	Benign	Likely benign
chr6	31356300	C	G	synonymous_variant	rs709053	HLA-B	0.188124	Benign
chr6	31356301	G	A	missense_variant	rs1050368	HLA-B	0.000157887	Benign
chr6	31356301	G	T	missense_variant	rs1050368	HLA-B	0.0917683	Benign
chr6	31356309	G	A	synonymous_variant	rs709054	HLA-B	0.00826374	Benign
chr6	31356309	G	C	synonymous_variant	rs709054	HLA-B	0.193256	Benign
chr6	31356312	G	A	synonymous_variant	rs1050370	HLA-B	0.0184055	Likely_benign
chr6	31356318	G	A	synonymous_variant	rs137854737	HLA-B	0.00017055	Benign
chr6	31356323	G	T	missense_variant	rs1050654	HLA-B	0.154511	Benign
chr6	31356327	G	A	synonymous_variant	rs17839985	HLA-B	0.0468937	Benign
chr6	31356366	G	T	stop_gained	rs12697944	HLA-B	0.0508688	Benign
chr6	31356367	T	A	missense_variant	rs4997052	HLA-B	0.149834	Benign
chr6	31356367	T	G	missense_variant	rs4997052	HLA-B	0.160129	Benign	Benign
chr6	31356368	A	C	missense_variant	rs9266150	HLA-B	0.0457984	Benign
chr6	31356370	T	TGCC	conservative_inframe_insertion		HLA-B	1.03083e-05	Likely_benign
chr6	31356372	G	C	missense_variant	rs41560817	HLA-B	9.46405e-05	Likely_benign
chr6	31356373	T	C	missense_variant	rs137854723	HLA-B	3.09352e-06	Likely_benign
chr6	31356373	TC	T	frameshift_variant		HLA-B	1.34054e-05	Likely_benign
chr6	31356374	C	G	missense_variant	rs709055	HLA-B	0.0237087	Benign
chr6	31356374	C	T	missense_variant	rs709055	HLA-B	0.348191	Benign
chr6	31356375	A	G	synonymous_variant	rs1050628	HLA-B	0.0241817	Benign
chr6	31356375	ATG	A	frameshift_variant		HLA-B	1.35897e-05	Likely_benign
chr6	31356377	G	A	missense_variant	rs1050379	HLA-B	0.299349	Benign
chr6	31356389	G	A	missense_variant	rs41558819	HLA-B	0.00100671	Benign	Benign
chr6	31356399	C	G	synonymous_variant	rs12721836	HLA-B	0.176522	Benign
chr6	31356407	C	G	missense_variant	rs1131112	HLA-B	0.192138	Benign
chr6	31356417	G	A	synonymous_variant	rs3179865	HLA-B	0.240337	Benign
chr6	31356418	T	C	missense_variant	rs151341218	HLA-B	0.0178435	Benign
chr6	31356423	G	C	missense_variant	rs1140412	HLA-B	0.427785	Benign	Benign
chr6	31356424	C	A	missense_variant	rs1071652	HLA-B	0.00320149	Likely_benign
chr6	31356424	C	G	missense_variant	rs1071652	HLA-B	0.0271653	Likely_benign
chr6	31356425	T	A	missense_variant	rs41556417	HLA-B	0.0890029	Benign
chr6	31356425	T	C	missense_variant	rs41556417	HLA-B	0.00302175	Likely_benign
chr6	31356428	G	GCC	frameshift_variant	rs760342210	HLA-B	0.030463	Uncertain_significance
chr6	31356429	G	A	synonymous_variant	rs1131235	HLA-B	0.030698	Likely_benign
chr6	31356429	G	C	synonymous_variant	rs1131235	HLA-B	2.30131e-06	Likely_benign
chr6	31356430	A	C	missense_variant	rs41556312	HLA-B	1.15109e-06	Likely_benign
chr6	31356430	AGG	A	frameshift_variant	rs753354858	HLA-B	0.0308003	Uncertain_significance
chr6	31356431	G	A	missense_variant	rs12721829	HLA-B	3.80449e-06	Likely_benign
chr6	31356431	G	T	missense_variant	rs12721829	HLA-B	0.0505524	Benign
chr6	31356432	G	A	synonymous_variant	rs1131233	HLA-B	1.25888e-06	Likely_benign
chr6	31356433	G	A	missense_variant	rs12721827	HLA-B	0.0457036	Benign
chr6	31356712	C	G	missense_variant	rs3180380	HLA-B	0.0156403	Benign
chr6	31356714	C	A	missense_variant	rs3180379	HLA-B	0.0157089	Benign
chr6	31356719	G	A	synonymous_variant		HLA-B	9.88424e-07	Likely_benign
chr6	31356720	T	G	missense_variant	rs1131223	HLA-B	0.0190569	Benign
chr6	31356729	C	T	missense_variant	rs1050388	HLA-B	0.0666924	Likely_benign
chr6	31356730	T	C	missense_variant	rs1131217	HLA-B	0.0144738	Benign
chr6	31356732	T	A	missense_variant	rs41553715	HLA-B	0.00791554	Benign
chr6	31356739	C	A	missense_variant	rs1131215	HLA-B	0.358161	Likely_benign
chr6	31356747	GCC	G	frameshift_variant	rs750527298	HLA-B	0.634118	Benign	Benign
chr6	31356748	C	T	missense_variant	rs1131213	HLA-B	9.46626e-05	Likely_benign
chr6	31356749	C	G	missense_variant	rs1131212	HLA-B	0.00237414	Benign
chr6	31356751	G	GTT	frameshift_variant	rs749557905	HLA-B	0.655268	Benign	Benign
chr6	31356751	G	T	missense_variant	rs1071817	HLA-B	0.0122954	Likely_benign
chr6	31356753	G	C	missense_variant	rs41546313	HLA-B	0.00523529	Likely_benign
chr6	31356754	C	G	missense_variant	rs1131204	HLA-B	0.00497618	Likely_benign
chr6	31356754	C	T	missense_variant	rs1131204	HLA-B	0.661586	Benign	Benign
chr6	31356759	T	A	missense_variant	rs1071816	HLA-B	0.337419	Benign
chr6	31356759	T	C	missense_variant	rs1071816	HLA-B	0.120231	Benign
chr6	31356759	T	G	missense_variant	rs1071816	HLA-B	0.17374	Likely_benign
chr6	31356770	G	C	missense_variant	rs1065386	HLA-B	0.147663	Likely_benign
chr6	31356772	T	C	missense_variant	rs1050570	HLA-B	0.143858	Likely_benign
chr6	31356785	C	T	synonymous_variant	rs1050564	HLA-B	0.0940593	Benign
chr6	31356809	C	T	synonymous_variant	rs1050556	HLA-B	0.225063	Likely_benign
chr6	31356818	C	G	synonymous_variant	rs1050543	HLA-B	0.167918	Likely_benign
chr6	31356824	C	CG	frameshift_variant	rs9281379	HLA-B	0.148538	Uncertain_significance
chr6	31356825	T	G	missense_variant	rs41562914	HLA-B	2.88499e-06	Likely_benign
chr6	31356826	C	T	missense_variant	rs9266178	HLA-B	0.0752565	Likely_benign
chr6	31356826	CT	C	frameshift_variant	rs200186034	HLA-B	0.179629	Uncertain_significance
chr6	31356827	T	C	synonymous_variant	rs9266179	HLA-B	0.104644	Likely_benign
chr6	31356866	G	C	synonymous_variant	rs1050517	HLA-B	0.504192	Benign
chr6	31356882	C	T	missense_variant	rs281864589	HLA-B	0	Uncertain_significance
chr6	31356889	A	C	missense_variant	rs713031	HLA-B	0.173468	Likely_benign
chr6	31356890	G	A	synonymous_variant	rs1050502	HLA-B	0.0184841	Uncertain_significance
chr6	31356918	C	T	missense_variant	rs79051037	HLA-B	0	Uncertain_significance
chr6	31356925	C	T	missense_variant	rs1050486	HLA-B	0.45091	Benign
chr6	31356928	A	C	missense_variant	rs1131170	HLA-B	0.511964	Benign
chr6	31356929	G	A	synonymous_variant	rs151341094	HLA-B	2.92325e-05	Likely_benign
chr6	31356934	A	C	missense_variant	rs2596492	HLA-B	0.192656	Benign
chr6	31356934	A	G	missense_variant	rs2596492	HLA-B	0.100346	Benign	Likely benign
chr6	31356965	T	C	splice_region_variant,intron_variant	rs147324178	HLA-B	0.661082	Benign
chr6	31357006	G	A	intron_variant	rs767251021	HLA-B	3.44272e-06	Likely_benign
chr6	31357011	T	C	intron_variant	rs9266193	HLA-B	0.11336	Benign
chr6	31357013	A	G	intron_variant	rs9266194	HLA-B	0.112167	Benign
chr6	31357049	C	A	intron_variant	rs1246726705	HLA-B	0	Likely_benign
chr6	31357052	G	C	intron_variant	rs9266196	HLA-B	0.121907	Benign
chr6	31357053	G	A	intron_variant	rs9266197	HLA-B	0.121261	Benign
chr6	31357053	G	C	intron_variant	rs9266197	HLA-B	1.3018e-06	Likely_benign
chr6	31357110	G	C	missense_variant	rs1131165	HLA-B	0.0267269	Benign
chr6	31357111	G	T	synonymous_variant	rs1131163	HLA-B	0.0266546	Benign
chr6	31357114	C	T	synonymous_variant	rs1131161	HLA-B	0.00570689	Benign
chr6	31357115	G	C	missense_variant	rs1131159	HLA-B	0.0507125	Benign
chr6	31357115	G	T	missense_variant	rs1131159	HLA-B	0	Likely_benign
chr6	31357118	G	C	missense_variant	rs1131156	HLA-B	0.0419041	Benign
chr6	31357131	G	T	missense_variant	rs749523872	HLA-B	4.63967e-05	Likely_benign
chr6	31357144	C	T	synonymous_variant	rs1050459	HLA-B	0.0263329	Benign
chr6	31357148	A	G	missense_variant	rs1050458	HLA-B	0.0486433	Benign
chr6	31357154	A	C	missense_variant	rs9266206	HLA-B	0.0461538	Likely_benign
chr6	31575827	G	A	missense_variant	rs576621666	TNF	1.78043e-05	Likely_benign
chr6	32393972	G	C	missense_variant	rs34940131	BTNL2	0.131262	Benign
chr6	32393975	C	T	synonymous_variant	rs34507608	BTNL2	0.130696	Benign
chr6	32393985	G	A	missense_variant	rs35624343	BTNL2	0.146602	Benign
chr6	32394022	C	G	missense_variant	rs117896888	BTNL2	0.0150741	Benign
chr6	32394032	T	C	synonymous_variant	rs34926345	BTNL2	0.129108	Benign
chr6	32394044	C	T	synonymous_variant	rs3129953	BTNL2	0.14484	Benign
chr6	32394744	C	A	stop_gained,splice_region_variant	rs28362675	BTNL2	0.0153702	Benign
chr6	32394862	G	A	synonymous_variant	rs41535850	BTNL2	0.153833	Benign
chr6	32394892	T	G	synonymous_variant	rs41449245	BTNL2	0.153537	Benign
chr6	32394925	T	C	synonymous_variant	rs41342846	BTNL2	0.153592	Benign
chr6	32394926	G	T	missense_variant	rs41521946	BTNL2	0.153506	Benign
chr6	32394964	C	T	missense_variant	rs28362677	BTNL2	0.153382	Benign
chr6	32394968	G	A	missense_variant	rs28362678	BTNL2	0.153382	Benign
chr6	32395008	G	A	synonymous_variant	rs76868526	BTNL2	0.013978	Benign
chr6	32396039	T	C	missense_variant,splice_region_variant	rs2076530	BTNL2	0.439088	Benign
chr6	32396067	C	T	synonymous_variant	rs9268480	BTNL2	0.27748	Benign
chr6	32396111	C	T	missense_variant	rs41441651	BTNL2	0.0154514	Benign
chr6	32396178	T	C	synonymous_variant	rs2076529	BTNL2	0.4321	Benign
chr6	32396196	C	T	synonymous_variant	rs41392447	BTNL2	0.0154186	Benign
chr6	32396232	C	T	missense_variant	rs749915466	BTNL2	3.90199e-05	Likely_benign
chr6	32396234	T	C	missense_variant	rs41417449	BTNL2	0.0154105	Benign
chr6	32396269	T	A	missense_variant	rs34423804	BTNL2	0.0159635	Benign
chr6	32396275	C	T	missense_variant	rs41355746	BTNL2	0.0154362	Benign
chr6	32396280	C	T	synonymous_variant	rs41333546	BTNL2	0.015434	Benign
chr6	32403014	G	A	synonymous_variant	rs78107756	BTNL2	0.0159672	Benign
chr6	32403017	C	T	synonymous_variant	rs60036207	BTNL2	0.0797218	Benign
chr6	32403038	C	T	synonymous_variant	rs147483338	BTNL2	0.00265091	Benign
chr6	32403039	G	A	missense_variant	rs28362680	BTNL2	0.0956648	Benign
chr6	32403055	C	T	missense_variant	rs143816072	BTNL2	0.000247153	Benign
chr6	32403058	T	C	missense_variant	rs2076523	BTNL2	0.373277	Benign
chr6	32403083	G	A	synonymous_variant	rs75415018	BTNL2	0.0154475	Benign
chr6	32403102	C	T	missense_variant	rs28362681	BTNL2	0.0795886	Benign
chr6	32403131	T	A	synonymous_variant	rs59129682	BTNL2	0.0795522	Benign
chr6	32403150	G	A	missense_variant	rs78587369	BTNL2	0.0154337	Benign
chr6	32403192	TG	T	frameshift_variant	rs60740710	BTNL2	0.0778058	Benign	Benign
chr6	32403198	C	T	missense_variant	rs60263670	BTNL2	0.07836	Benign
chr6	32403209	C	A	synonymous_variant	rs57116766	BTNL2	0.0771507	Benign
chr6	32403216	C	T	missense_variant,splice_region_variant	rs115653647	BTNL2	0.028923	Benign
chr6	32405086	A	T	missense_variant	rs28362682	BTNL2	0.0797651	Benign
chr6	32405186	G	A	synonymous_variant	rs28362683	BTNL2	0.0797688	Benign
chr6	32407088	T	C	synonymous_variant	rs41395046	BTNL2	0.00275072	Benign	Benign
chr6	32660245	A	G	synonymous_variant	rs1140347	HLA-DQB1	0.053689	Benign
chr6	32661352	T	C	missense_variant	rs1130432	HLA-DQB1	0.195478	Benign
chr6	32661360	T	G	missense_variant	rs1140343	HLA-DQB1	0.488129	Benign
chr6	32661364	C	T	missense_variant	rs1140342	HLA-DQB1	0.457297	Benign
chr6	32661369	G	A	synonymous_variant	rs3210168	HLA-DQB1	0.13699	Benign
chr6	32661378	C	A	synonymous_variant	rs1130431	HLA-DQB1	0.236943	Benign
chr6	32661384	A	G	synonymous_variant	rs1130430	HLA-DQB1	0.356071	Benign
chr6	32661393	C	G	synonymous_variant	rs1130410	HLA-DQB1	0.0582765	Benign
chr6	32661416	C	T	missense_variant	rs1049163	HLA-DQB1	0.271308	Benign
chr6	32661433	C	T	missense_variant	rs1130429	HLA-DQB1	0.0135877	Benign
chr6	32661450	C	T	synonymous_variant	rs9273660	HLA-DQB1	0.115787	Benign
chr6	32661978	G	A	missense_variant	rs1130399	HLA-DQB1	0.115584	Benign
chr6	32661987	C	T	missense_variant	rs1130398	HLA-DQB1	0.312492	Benign
chr6	32662025	A	G	synonymous_variant	rs1049092	HLA-DQB1	0.575935	Benign
chr6	32662032	C	T	missense_variant	rs701564	HLA-DQB1	0.139392	Benign
chr6	32662070	A	G	synonymous_variant	rs1049133	HLA-DQB1	0.76882	Benign
chr6	32662082	A	G	synonymous_variant	rs1049130	HLA-DQB1	0.499973	Benign
chr6	32662091	A	G	synonymous_variant	rs1049088	HLA-DQB1	0.185118	Benign
chr6	32662112	G	A	synonymous_variant	rs1049087	HLA-DQB1	0.350042	Benign
chr6	32662114	C	T	missense_variant	rs1063323	HLA-DQB1	0.236765	Benign
chr6	32662127	A	G	synonymous_variant	rs1049086	HLA-DQB1	0.536296	Benign
chr6	32662128	T	C	missense_variant	rs2647032	HLA-DQB1	0.0927588	Likely_benign
chr6	32662143	C	T	missense_variant	rs41544112	HLA-DQB1	0.0459153	Benign
chr6	32662158	C	G	missense_variant	rs1063322	HLA-DQB1	0.500303	Benign
chr6	32662159	C	T	missense_variant	rs1049107	HLA-DQB1	0.200028	Benign
chr6	32662178	C	T	synonymous_variant	rs1063321	HLA-DQB1	0.199956	Benign
chr6	32662186	C	T	missense_variant	rs1049100	HLA-DQB1	0.188046	Benign
chr6	32664801	T	G	synonymous_variant	rs1140322	HLA-DQB1	0.0752498	Likely_benign
chr6	32664804	T	G	synonymous_variant	rs1140321	HLA-DQB1	0.0788798	Likely_benign
chr6	32664810	A	G	synonymous_variant	rs1130397	HLA-DQB1	0.385717	Benign
chr6	32664812	A	G	missense_variant	rs1140320	HLA-DQB1	0.0891725	Likely_benign
chr6	32664815	C	G	missense_variant	rs1140319	HLA-DQB1	0.0917392	Likely_benign
chr6	32664816	C	T	missense_variant	rs1140318	HLA-DQB1	0.0925175	Likely_benign
chr6	32664821	A	T	missense_variant	rs17412833	HLA-DQB1	0.377634	Benign
chr6	32664822	A	G	missense_variant	rs9274379	HLA-DQB1	0.0999399	Likely_benign
chr6	32664824	G	C	missense_variant	rs9274380	HLA-DQB1	0.101073	Benign
chr6	32664824	G	T	missense_variant	rs9274380	HLA-DQB1	0.102076	Likely_benign
chr6	32664828	C	A	missense_variant	rs1140317	HLA-DQB1	0.106165	Likely_benign
chr6	32664831	C	G	missense_variant	rs1140316	HLA-DQB1	0.112949	Likely_benign
chr6	32664850	C	T	synonymous_variant	rs1130389	HLA-DQB1	0.0574908	Benign
chr6	32664851	G	C	missense_variant	rs1130392	HLA-DQB1	0.211189	Benign
chr6	32664858	A	C	missense_variant	rs9274384	HLA-DQB1	0.231189	Benign
chr6	32664860	T	G	missense_variant	rs1130387	HLA-DQB1	0.220616	Benign
chr6	32664861	C	A	stop_gained	rs1130385	HLA-DQB1	0.227206	Benign
chr6	32664865	C	T	synonymous_variant	rs3204379	HLA-DQB1	0.032008	Benign
chr6	32664870	T	C	missense_variant	rs1130390	HLA-DQB1	0.213653	Benign
chr6	32664873	C	T	missense_variant	rs1130386	HLA-DQB1	0.428334	Benign
chr6	32664882	C	T	missense_variant	rs9274390	HLA-DQB1	0.0386333	Benign
chr6	32664883	T	G	missense_variant	rs281874783	HLA-DQB1	0.0385196	Benign
chr6	32664895	G	A	synonymous_variant	rs1130382	HLA-DQB1	0.00584949	Benign
chr6	32664910	A	G	synonymous_variant	rs1140314	HLA-DQB1	0.382134	Benign
chr6	32664911	T	A	missense_variant	rs1071637	HLA-DQB1	0.182835	Benign
chr6	32664911	T	G	missense_variant	rs1071637	HLA-DQB1	0.0938312	Benign
chr6	32664914	G	A	missense_variant	rs1130381	HLA-DQB1	0.0152931	Benign
chr6	32664917	C	G	missense_variant	rs1130380	HLA-DQB1	0.276091	Benign
chr6	32664923	T	A	missense_variant	rs1140313	HLA-DQB1	0.442184	Benign
chr6	32664926	G	T	missense_variant	rs9274395	HLA-DQB1	0.0417767	Likely_benign
chr6	32664927	G	C	missense_variant	rs199697520	HLA-DQB1	0.0428283	Likely_benign
chr6	32664934	C	T	synonymous_variant	rs1049074	HLA-DQB1	0.141839	Benign
chr6	32664937	G	C	synonymous_variant	rs3210148	HLA-DQB1	0.76757	Benign
chr6	32664940	G	A	synonymous_variant	rs1049073	HLA-DQB1	0.248645	Benign
chr6	32664941	T	A	missense_variant	rs9274397	HLA-DQB1	0.0161651	Likely_benign
chr6	32664944	A	T	missense_variant	rs9274398	HLA-DQB1	0.0444662	Likely_benign
chr6	32664947	C	T	missense_variant	rs1049083	HLA-DQB1	0.137422	Benign
chr6	32664967	C	T	synonymous_variant	rs1049082	HLA-DQB1	0.344698	Benign
chr6	32664968	G	A	missense_variant	rs1063318	HLA-DQB1	0.232231	Benign
chr6	32664971	T	A	missense_variant	rs750855857	HLA-DQB1	0.00267709	Benign
chr6	32664972	A	C	missense_variant	rs281874782	HLA-DQB1	0.0249174	Benign
chr6	32664972	A	T	missense_variant	rs281874782	HLA-DQB1	0.0143142	Likely_benign
chr6	32664976	C	T	synonymous_variant	rs9274402	HLA-DQB1	0.00455188	Benign
chr6	32664992	T	C	missense_variant	rs767838657	HLA-DQB1	0.00258974	Benign
chr6	32664993	A	G	missense_variant	rs281862065	HLA-DQB1	0.300162	Benign
chr6	32664993	A	T	missense_variant	rs281862065	HLA-DQB1	0.00264686	Benign
chr6	32664998	G	C	missense_variant	rs9274405	HLA-DQB1	0.00300125	Benign
chr6	32665000	C	T	synonymous_variant	rs1049068	HLA-DQB1	0.13786	Benign
chr6	32665004	A	C	missense_variant	rs1049066	HLA-DQB1	0.201571	Benign
chr6	32665004	A	T	missense_variant	rs1049066	HLA-DQB1	0.215279	Benign
chr6	32665005	G	A	missense_variant	rs12722115	HLA-DQB1	0.215529	Benign
chr6	32665005	G	C	missense_variant	rs12722115	HLA-DQB1	0.200634	Benign
chr6	32665006	A	C	synonymous_variant	rs1140310	HLA-DQB1	0.203761	Benign
chr6	32665018	C	G	synonymous_variant	rs1049079	HLA-DQB1	0.0426694	Benign
chr6	32665018	C	T	synonymous_variant	rs1049079	HLA-DQB1	0.00275924	Benign
chr6	32665024	G	A	synonymous_variant	rs3204373	HLA-DQB1	0.0230964	Benign
chr6	32665041	T	G	missense_variant	rs1130368	HLA-DQB1	0.142943	Benign
chr6	32665043	C	G	missense_variant	rs1130375	HLA-DQB1	0.238839	Benign
chr6	32665055	A	T	missense_variant	rs9274407	HLA-DQB1	0.757318	Benign
chr6	32665056	A	G	missense_variant	rs12722107	HLA-DQB1	0.0251463	Benign
chr6	32666505	A	G	missense_variant	rs12722106	HLA-DQB1	0.0146297	Benign
chr6	32666522	A	ACC	frameshift_variant	rs749944694	HLA-DQB1	0.0962839	Benign
chr6	32666523	G	C	missense_variant	rs1130366	HLA-DQB1	0.189496	Benign
chr6	32666523	GTA	G	frameshift_variant	rs766371114	HLA-DQB1	0.102626	Benign
chr6	32666524	T	C	synonymous_variant	rs1130373	HLA-DQB1	5.15702e-06	Likely_benign
chr6	32666525	A	G	missense_variant	rs1049062	HLA-DQB1	0.52814	Benign
chr6	32666526	G	A	synonymous_variant	rs1049061	HLA-DQB1	0.245376	Benign
chr6	32666529	A	T	missense_variant	rs1049060	HLA-DQB1	0.304045	Benign
chr6	32666536	C	G	missense_variant	rs1049059	HLA-DQB1	0.256425	Benign
chr6	32666541	C	A	missense_variant	rs3891176	HLA-DQB1	0.0515393	Benign
chr6	32666554	G	A	synonymous_variant	rs1049058	HLA-DQB1	0.0952321	Benign
chr6	32666554	G	C	synonymous_variant	rs1049058	HLA-DQB1	0.182269	Benign
chr6	32666562	C	G	missense_variant	rs36222416	HLA-DQB1	0.0139724	Benign
chr6	32666564	A	G	missense_variant	rs3189152	HLA-DQB1	0.16924	Benign
chr6	32666573	T	C	missense_variant	rs1049057	HLA-DQB1	0.305565	Benign
chr6	32666578	G	A	synonymous_variant	rs1049072	HLA-DQB1	0.101695	Benign
chr6	32666592	C	A	missense_variant	rs1049056	HLA-DQB1	0.235598	Benign
chr6	32666596	C	T	synonymous_variant	rs9274522	HLA-DQB1	0.174051	Benign
chr6	33079835	G	C	intron_variant	rs3097671	HLA-DPB1	0.153408	Benign
chr6	33080680	C	G	missense_variant	rs1126504	HLA-DPB1	0.282994	Benign
chr6	33080682	T	G	synonymous_variant	rs1126506	HLA-DPB1	0.283118	Benign
chr6	33080683	T	C	missense_variant	rs12722013	HLA-DPB1	0.0563117	Benign
chr6	33080684	T	A	missense_variant	rs1126509	HLA-DPB1	0.283212	Benign
chr6	33080689	G	T	stop_gained	rs1126511	HLA-DPB1	0.217093	Benign
chr6	33080690	G	T	missense_variant	rs1126513	HLA-DPB1	0.217138	Benign
chr6	33080762	T	A	missense_variant	rs1042117	HLA-DPB1	0.109888	Benign
chr6	33080765	C	T	missense_variant	rs1042121	HLA-DPB1	0.483669	Benign
chr6	33080792	T	A	missense_variant	rs145190720	HLA-DPB1	0.00135301	Likely_benign
chr6	33080822	C	A	missense_variant	rs707958	HLA-DPB1	0.471029	Benign
chr6	33080825	C	A	missense_variant	rs1042131	HLA-DPB1	0.426616	Benign
chr6	33080829	G	C	missense_variant	rs1042133	HLA-DPB1	0.151032	Benign
chr6	33080830	T	C	missense_variant	rs114493737	HLA-DPB1	0.00362522	Likely_benign
chr6	33080851	A	C	missense_variant	rs1042136	HLA-DPB1	0.158325	Benign
chr6	33080863	A	G	missense_variant	rs1042140	HLA-DPB1	0.229733	Benign	risk factor
chr6	33080884	A	G	missense_variant	rs1042151	HLA-DPB1	0.193423	Benign
chr6	33080886	G	A	missense_variant	rs1042153	HLA-DPB1	0.219182	Benign
chr6	33080909	G	A	missense_variant	rs1042169	HLA-DPB1	0.314846	Benign
chr6	33080912	G	A	missense_variant	rs9277354	HLA-DPB1	0.314747	Benign
chr6	33080914	C	G	missense_variant	rs9277355	HLA-DPB1	0.314734	Benign
chr6	33080917	A	G	missense_variant	rs9277356	HLA-DPB1	0.314727	Benign
chr6	33084959	G	A	missense_variant	rs1126537	HLA-DPB1	0.135452	Benign
chr6	33084966	T	C	synonymous_variant	rs1126541	HLA-DPB1	0.13595	Benign
chr6	33084991	T	C	synonymous_variant	rs1042187	HLA-DPB1	0.145097	Benign
chr6	33085026	G	A	synonymous_variant	rs1042212	HLA-DPB1	0.164646	Benign
chr6	33085173	T	C	synonymous_variant	rs1042331	HLA-DPB1	0.308973	Benign
chr6	33085181	C	T	missense_variant	rs1042335	HLA-DPB1	0.308844	Benign
chr6	33085204	C	A	missense_variant	rs14362	HLA-DPB1	0.118045	Benign
chr6	33085209	T	C	synonymous_variant	rs1071597	HLA-DPB1	0.306055	Benign
chr6	33085800	G	A	missense_variant	rs9276	HLA-DPB1	0.0615051	Benign
chr6	33085832	G	A	missense_variant	rs11551421	HLA-DPB1	0.0498035	Benign
chr6	33085905	G	A	intron_variant	rs9277471	HLA-DPB1	0.312787	Benign
chr6	33086236	TA	T	stop_retained_variant	rs67523850	HLA-DPB1	0.0286753	Benign
chr6	33164453	C	G	missense_variant	rs2229790	COL11A2	0.000775128	Benign	Benign/Likely benign
chr6	33167839	G	A	missense_variant	rs543145528	COL11A2	0.000321082	Benign	Benign/Likely benign
chr6	33170900	G	A	synonymous_variant	rs1799911	COL11A2	0.269086	Benign	Benign
chr6	33171551	C	T	synonymous_variant	rs1799910	COL11A2	0.460309	Benign	Benign
chr6	33173384	A	G	synonymous_variant	rs2229785	COL11A2	0.747149	Benign	Benign
chr6	33173503	G	A	missense_variant,splice_region_variant	rs2855430	COL11A2	0.133811	Benign	Benign
chr6	33174020	C	T	synonymous_variant	rs117237998	COL11A2	0.00192023	Benign	Benign/Likely benign
chr6	33176466	T	A	synonymous_variant	rs1799908	COL11A2	0.428795	Benign	Benign
chr6	33177050	A	C	splice_region_variant,intron_variant	rs200523422	COL11A2	0.000721161	Benign	Conflicting classifications of pathogenicity
chr6	33185345	C	G	intron_variant	rs2744505	COL11A2		Benign	Benign
chr6	33185414	C	T	intron_variant	rs376818337	COL11A2		Benign
chr6	33185751	C	T	missense_variant	rs9277934	COL11A2	0.310838	Benign	Benign
chr6	33186589	G	T	intron_variant	rs200989046	COL11A2	0.000502791	Benign	Benign/Likely benign
chr6	33192466	G	A	5_prime_UTR_variant	rs886061320	COL11A2	0.000884032	Likely_benign	Uncertain significance
chr6	44392796	G	A	synonymous_variant	rs10948136	CDC5L	0.0349118	Benign	Benign
chr6	44403953	T	C	synonymous_variant	rs11571943	CDC5L	0.0228313	Benign
chr6	44403977	C	T	synonymous_variant	rs6934058	CDC5L	0.118677	Benign	Benign
chr6	44445726	T	A	synonymous_variant	rs2273666	CDC5L	0.097839	Benign	Benign
chr6	45422774	G	A	synonymous_variant	rs6921145	RUNX2	0.103849	Benign	Benign
chr6	55774230	G	A	synonymous_variant	rs41271330	BMP5	0.123502	Benign	Benign
chr6	55874486	A	T	missense_variant	rs148766592	BMP5	0.00614176	Benign	Benign
chr6	55874755	A	G	synonymous_variant	rs3734444	BMP5	0.418519	Benign	Benign
chr6	70234582	C	T	synonymous_variant	rs2072650	COL9A1	0.0188281	Benign	Benign
chr6	70252130	T	C	missense_variant	rs1135056	COL9A1	0.399215	Benign	Benign
chr6	70253421	A	C	synonymous_variant	rs9346373	COL9A1	0.111357	Benign	Benign
chr6	70272083	A	G	synonymous_variant	rs607156	COL9A1	0.0248581	Benign	Benign
chr6	70274733	A	G	missense_variant	rs592121	COL9A1	0.388788	Benign	Benign
chr6	70281453	C	T	synonymous_variant	rs577301262	COL9A1	6.84924e-06	Likely_benign
chr6	112054686	A	G	intron_variant	rs2280152	CCN6	0.245364	Benign
chr6	112061110	G	T	missense_variant	rs1230345	CCN6	0.269802	Benign	Benign
chr6	112061190	G	A	missense_variant	rs147337485	CCN6	0.00140504	Benign	Benign/Likely benign
chr6	112069568	A	T	missense_variant	rs587640965	CCN6	2.39485e-05	Uncertain_significance	Uncertain significance
chr6	116119744	G	GT	3_prime_UTR_variant	rs371155563	COL10A1	0.0531209	Benign	Uncertain significance
chr6	116119744	GT	G	3_prime_UTR_variant	rs371155563	COL10A1	0.00576108	Likely_benign	Uncertain significance
chr6	116120307	C	G	synonymous_variant	rs2228548	COL10A1	0.0556339	Benign	Benign
chr6	116120483	C	G	missense_variant	rs2228547	COL10A1	0.129727	Benign	Benign
chr6	116125413	A	G	missense_variant	rs1064583	COL10A1	0.390645	Benign	Benign
chr6	151807942	T	C	synonymous_variant	rs2077647	ESR1	0.47488	Benign	Benign
chr6	151808141	G	A	missense_variant	rs9340773	ESR1	0.00200625	Benign	Benign
chr6	151808173	G	C	synonymous_variant	rs746432	ESR1	0.0802019	Benign	Benign
chr6	151842200	T	C	intron_variant	rs2234693	ESR1		Benign	risk factor
chr6	151842246	A	G	intron_variant	rs9340799	ESR1		Benign
chr6	151878994	T	C	intron_variant	rs9322335	ESR1		Benign
chr6	151880740	T	C	synonymous_variant	rs4986934	ESR1	0.961718	Benign
chr6	151916333	T	C	intron_variant	rs4870061	ESR1		Benign
chr6	151944387	G	C	synonymous_variant	rs1801132	ESR1	0.751624	Benign
chr6	152061247	G	A	intron_variant	rs2207396	ESR1	0.223454	Benign	Benign
chr6	152098960	G	A	synonymous_variant	rs2228480	ESR1	0.18966	Benign	Benign/Likely benign
chr6	152103343	A	G	intron_variant	rs2813543	ESR1	0.81222	Benign
chr7	22727597	G	A	missense_variant		IL6		Uncertain_significance
chr7	22731537	C	T	synonymous_variant	rs2069849	IL6	0.029919	Benign	Benign
chr7	44104686	G	A	synonymous_variant	rs572403133	AEBP1	0.000860847	Benign	Benign/Likely benign
chr7	44107886	C	A	missense_variant	rs2537188	AEBP1	0.373307	Benign	Benign
chr7	44108954	A	G	synonymous_variant	rs2595701	AEBP1	0.690883	Benign	Benign
chr7	44109672	G	C	intron_variant	rs143523320	AEBP1	0.000414724	Likely_benign
chr7	44114015	C	G	synonymous_variant	rs61736256	AEBP1	0.0485773	Benign	Benign
chr7	44114181	A	G	missense_variant	rs13928	AEBP1	0.447656	Benign	Benign
chr7	50446749	T	C	missense_variant	rs540678912	FIGNL1	4.10433e-05	Likely_benign	Likely benign
chr7	50446879	C	T	missense_variant	rs10235371	FIGNL1	0.0935784	Benign
chr8	115409261	G	GA	3_prime_UTR_variant	rs755990611	TRPS1		Benign
chr8	115409261	G	GAAAAA	3_prime_UTR_variant	rs755990611	TRPS1		Benign
chr8	115409261	G	GAAAAAA	3_prime_UTR_variant	rs755990611	TRPS1		Uncertain_significance
chr8	115409261	G	GAAAAAAA	3_prime_UTR_variant	rs755990611	TRPS1		Benign
chr8	115409261	G	GAAAAAAAA	3_prime_UTR_variant	rs755990611	TRPS1		Benign	Uncertain significance
chr8	115409261	G	GAAAAAAAAA	3_prime_UTR_variant	rs755990611	TRPS1		Benign
chr8	115409261	GA	G	3_prime_UTR_variant	rs755990611	TRPS1		Benign
chr8	115409261	GA	GAAAAAAA	3_prime_UTR_variant	rs755990611	TRPS1		Uncertain_significance
chr8	115409261	GA	GAAAAAAAAA	3_prime_UTR_variant	rs755990611	TRPS1		Benign	Uncertain significance
chr8	115409261	GAA	G	3_prime_UTR_variant	rs755990611	TRPS1		Benign
chr8	115411282	G	GA	3_prime_UTR_variant	rs879823190	TRPS1	0.00797872	Uncertain_significance
chr8	115412179	TA	T	3_prime_UTR_variant	rs886062619	TRPS1	0.010989	Benign	Uncertain significance
chr8	115587290	T	C	missense_variant	rs761148536	TRPS1	1.3681e-05	Benign
chr8	115603969	G	A	missense_variant	rs7002384	TRPS1	2.94168e-05	Benign	Likely benign
chr8	115619675	C	A	synonymous_variant	rs7823278	TRPS1	0.0170589	Benign	Benign
chr8	115668717	AAGAGAG	A	5_prime_UTR_variant	rs10546472	TRPS1	0.591463	Benign	Uncertain significance
chr8	115668717	AAGAGAGAG	A	5_prime_UTR_variant	rs10546472	TRPS1	0	Uncertain_significance
chr8	115668741	GAA	G	5_prime_UTR_variant	rs199575103	TRPS1	0.00974026	Benign	Uncertain significance
chr8	115668814	T	TA	5_prime_UTR_variant	rs759303878	TRPS1	0.130435	Benign
chr8	115668814	T	TAA	5_prime_UTR_variant	rs759303878	TRPS1	0.0227273	Benign	Uncertain significance
chr8	115668814	TA	T	5_prime_UTR_variant	rs759303878	TRPS1	0.181818	Benign
chr8	115668814	TA	TAA	5_prime_UTR_variant	rs759303878	TRPS1	0.130435	Benign
chr8	115668814	TA	TAAA	5_prime_UTR_variant	rs759303878	TRPS1	0.0227273	Benign	Uncertain significance
chr8	115668814	TAA	T	5_prime_UTR_variant	rs759303878	TRPS1	0	Benign
chr8	118924430	A	G	synonymous_variant	rs1804854	TNFRSF11B	0.00856177	Benign	Benign
chr8	118924739	C	T	missense_variant	rs140782326	TNFRSF11B	0.00239902	Benign	Benign
chr8	118926543	T	C	synonymous_variant	rs2228568	TNFRSF11B	0.122483	Benign	Benign
chr8	118951813	G	C	missense_variant	rs2073618	TNFRSF11B	0.483846	Benign	Benign
chr8	130112313	T	C	missense_variant	rs966185	ASAP1	0.471984	Benign
chr8	130127934	G	A	synonymous_variant	rs75375911	ASAP1	0.0146488	Benign
chr8	130152754	C	T	synonymous_variant	rs74370122	ASAP1	0.0381694	Benign
chr8	143916360	A	G	synonymous_variant	rs7014582	PLEC	0.428773	Benign	Benign
chr8	143916616	G	A	missense_variant	rs113513807	PLEC	0.0223813	Benign	Benign
chr8	143917008	T	C	synonymous_variant	rs6558405	PLEC	0.429239	Benign	Benign
chr8	143917110	C	T	synonymous_variant	rs548342396	PLEC	6.19709e-05	Benign	Conflicting classifications of pathogenicity
chr8	143917461	C	T	synonymous_variant	rs146781600	PLEC	0.013014	Benign	Benign/Likely benign
chr8	143917935	T	C	synonymous_variant	rs6558406	PLEC	0.444645	Benign	Benign
chr8	143918193	T	C	synonymous_variant	rs7822511	PLEC	0.428721	Benign	Benign
chr8	143918210	C	T	missense_variant	rs201419047	PLEC	0.00131339	Benign	Conflicting classifications of pathogenicity
chr8	143918384	G	A	missense_variant	rs201666443	PLEC	0.000255309	Likely_benign	Uncertain significance
chr8	143918694	A	G	synonymous_variant	rs7819099	PLEC	0.422422	Benign	Benign
chr8	143918732	G	A	synonymous_variant	rs17062686	PLEC	0.0454935	Benign	Benign/Likely benign
chr8	143918817	C	T	synonymous_variant	rs782548278	PLEC	5.47613e-06	Likely_benign
chr8	143918901	G	A	synonymous_variant	rs28455570	PLEC	0.09368	Benign	Benign
chr8	143919156	C	T	synonymous_variant	rs6984820	PLEC	0.395573	Benign	Benign
chr8	143919209	A	G	synonymous_variant	rs6992333	PLEC	0.423836	Benign	Benign
chr8	143919303	G	A	synonymous_variant	rs373881796	PLEC	4.10492e-05	Benign	Likely benign
chr8	143919414	G	A	synonymous_variant	rs369578286	PLEC	0.000104721	Benign	Likely benign
chr8	143919573	G	A	synonymous_variant	rs200805625	PLEC	0.000469782	Benign	Benign/Likely benign
chr8	143919763	C	G	missense_variant	rs35261863	PLEC	0.0159984	Benign	Benign
chr8	143919900	G	A	synonymous_variant	rs553688147	PLEC	1.36914e-05	Benign	Likely benign
chr8	143920107	C	T	synonymous_variant	rs781935607	PLEC	2.05376e-05	Benign	Likely benign
chr8	143920720	G	A	missense_variant	rs35858667	PLEC	0.0728064	Benign	Benign/Likely benign
chr8	143920944	G	T	synonymous_variant	rs573682644	PLEC	0.000344361	Benign	Benign/Likely benign
chr8	143921309	C	T	missense_variant	rs201166060	PLEC	0.000292146	Benign	Likely benign
chr8	143921326	C	T	missense_variant	rs6558407	PLEC	0.396775	Benign	Benign
chr8	143921568	G	A	synonymous_variant	rs11777402	PLEC	0.396505	Benign	Benign
chr8	143921771	G	A	missense_variant	rs35723243	PLEC	0.0312309	Benign	Benign
chr8	143921796	G	A	synonymous_variant	rs35139934	PLEC	0.0663094	Benign	Benign/Likely benign
chr8	143921861	A	G	missense_variant	rs7833924	PLEC	0.422566	Benign	Benign
chr8	143921870	G	A	missense_variant	rs145977158	PLEC	0.000707629	Benign	Benign/Likely benign
chr8	143921943	C	T	synonymous_variant	rs34803322	PLEC	0.0684222	Benign	Benign
chr8	143922240	T	G	synonymous_variant	rs11778026	PLEC	0.396268	Benign	Benign
chr8	143922829	G	A	missense_variant	rs782618173	PLEC	5.58946e-05	Uncertain_significance	Uncertain significance
chr8	143923488	C	T	synonymous_variant	rs7016416	PLEC	0.396468	Benign	Benign
chr8	143923611	C	T	synonymous_variant	rs556328818	PLEC	0.000425531	Benign	Benign/Likely benign
chr8	143923615	G	A	missense_variant	rs74772299	PLEC	0.0468001	Benign	Benign
chr8	143923689	G	A	synonymous_variant	rs576688705	PLEC	0.000122649	Benign	Conflicting classifications of pathogenicity
chr8	143923759	G	A	missense_variant	rs7002002	PLEC	0.397984	Benign	Benign
chr8	143924001	C	T	synonymous_variant	rs1140522	PLEC	0.396345	Benign	Benign
chr8	143924022	A	G	synonymous_variant	rs2857829	PLEC	0.396349	Benign	Benign
chr8	143924346	C	T	synonymous_variant	rs75586449	PLEC	0.0476852	Benign	Benign
chr8	143924431	C	T	missense_variant	rs369277699	PLEC	0.000166464	Benign	Uncertain significance
chr8	143924582	C	T	missense_variant	rs782042846	PLEC	5.85713e-05	Uncertain_significance	Uncertain significance
chr8	143924700	C	T	synonymous_variant	rs140406501	PLEC	0.0265099	Benign	Benign/Likely benign
chr8	143924814	C	T	synonymous_variant	rs782757364	PLEC	3.88977e-05	Likely_benign	Conflicting classifications of pathogenicity
chr8	143925249	C	T	synonymous_variant	rs55836855	PLEC	0.396073	Benign	Benign
chr8	143925453	C	T	synonymous_variant	rs55646585	PLEC	0.387088	Benign	Benign
chr8	143925474	A	C	synonymous_variant	rs56117011	PLEC	0.395998	Benign	Benign
chr8	143925516	A	G	synonymous_variant	rs35916068	PLEC	0.395985	Benign	Benign
chr8	143925846	C	T	synonymous_variant	rs377619355	PLEC	0.00142051	Benign	Benign
chr8	143926863	T	C	missense_variant	rs55895668	PLEC	0.422363	Benign	Benign
chr8	143927341	T	C	splice_region_variant,intron_variant	rs11136333	PLEC	0.396397	Benign	Benign
chr8	143927420	C	T	missense_variant	rs11136334	PLEC	0.396547	Benign	Benign
chr8	143927616	A	G	synonymous_variant	rs3135109	PLEC	0.395896	Benign	Benign
chr8	143929239	G	A	missense_variant	rs367740468	PLEC	1.03454e-05	Uncertain_significance	Uncertain significance
chr8	143929517	C	T	missense_variant	rs534045685	PLEC	0.000472548	Benign	Conflicting classifications of pathogenicity
chr8	143931977	C	G	missense_variant	rs553811387	PLEC	5.0148e-05	Uncertain_significance	Uncertain significance
chr8	143932907	G	A	synonymous_variant	rs782746381	PLEC	1.91753e-05	Likely_benign	Likely benign
chr8	143933019	G	A	missense_variant	rs11136336	PLEC	0.374831	Benign	Benign
chr8	143934392	A	G	synonymous_variant	rs11783799	PLEC	0.375251	Benign	Benign
chr8	143935985	C	T	synonymous_variant	rs398123399	PLEC	0.00101761	Benign	Benign
chr8	143937036	A	G	synonymous_variant	rs6993938	PLEC	0.375233	Benign	Benign
chr8	143939147	G	T	intron_variant	rs11784501	PLEC		Benign	Benign
chr8	143950204	G	A	intron_variant	rs201053471	PLEC	0.00173668	Benign	Benign/Likely benign
chr8	143950677	G	C	intron_variant	rs527237157	PLEC	5.20198e-05	Likely_benign
chr8	143973448	G	C	missense_variant	rs782623344	PLEC	2.18973e-06	Uncertain_significance
chr9	122371200	T	C	missense_variant	rs1236913	PTGS1	0.927428	Benign
chr9	122371228	C	T	missense_variant	rs3842787	PTGS1	0.0656626	Benign
chr9	122375416	A	T	intron_variant	rs10306135	PTGS1	0.13568	Benign
chr9	122377927	G	A	synonymous_variant	rs3842788	PTGS1	0.0320189	Benign	Benign
chr9	122381513	C	A	synonymous_variant	rs5788	PTGS1	0.137049	Benign
chr9	122390342	G	A	missense_variant	rs5794	PTGS1	0.00816276	Benign	Likely benign
chr9	128523676	A	G	missense_variant	rs2275260	GLE1	0.226781	Benign	Benign
chr9	128541595	A	G	3_prime_UTR_variant	rs577169921	GLE1	0.000686423	Likely_benign	Uncertain significance
chr9	128541706	G	A	3_prime_UTR_variant	rs371069460	GLE1	0.000857633	Likely_benign	Uncertain significance
chr9	128542077	G	C	3_prime_UTR_variant	rs55823126	GLE1	0.1875	Benign	Benign
chr9	134642199	T	C	synonymous_variant	rs368818087	COL5A1	0.000794745	Benign	Benign/Likely benign
chr9	134691035	C	A	missense_variant		COL5A1		Uncertain_significance
chr9	134727349	C	T	synonymous_variant	rs3124299	COL5A1	0.436143	Benign	Benign
chr9	134728655	G	A	intron_variant	rs150200872	COL5A1	0.0156971	Benign	Conflicting classifications of pathogenicity
chr9	134730403	C	T	synonymous_variant	rs41306391	COL5A1	0.0225967	Benign	Benign
chr9	134750808	G	A	missense_variant	rs61735045	COL5A1	0.0417664	Benign	Benign/Likely benign
chr9	134796895	C	T	synonymous_variant	rs78511105	COL5A1	0.0400838	Benign	Benign/Likely benign
chr9	134815988	G	A	splice_region_variant,synonymous_variant	rs3827848	COL5A1	0.152981	Benign	Benign/Likely benign
chr9	134820151	G	C	synonymous_variant	rs2228560	COL5A1	0.363311	Benign	Benign
chr9	134835104	C	T	missense_variant	rs2229817	COL5A1	0.0048618	Benign	Benign/Likely benign
chr9	134843155	C	CT	3_prime_UTR_variant	rs57599653	COL5A1	0.00526316	Benign	Uncertain significance
chr9	134843155	CT	C	3_prime_UTR_variant	rs57599653	COL5A1	0.0265957	Benign
chrX	13714143	G	GA	3_prime_UTR_variant	rs1057515794	TRAPPC2	0.185731	Benign	Conflicting classifications of pathogenicity
chrX	13714143	G	GAA	3_prime_UTR_variant	rs1057515794	TRAPPC2	0.0491382	Benign	Benign
chrX	13714143	GA	G	3_prime_UTR_variant	rs1057515794	TRAPPC2	0.0672276	Benign	Benign
chrX	13714143	GA	GAA	3_prime_UTR_variant	rs1057515794	TRAPPC2	0.185731	Benign	Conflicting classifications of pathogenicity
chrX	13714143	GAA	G	3_prime_UTR_variant	rs1057515794	TRAPPC2	0.01268	Benign
chrX	47585586	T	C	synonymous_variant	rs4898	TIMP1	0.460375	Benign	Benign
chrX	137030536	C	T	missense_variant	rs377596671	GPR101	4.55703e-05	Benign
chrX	137030548	A	G	missense_variant	rs5931046	GPR101	0.156584	Benign	Benign
chrX	137031305	C	A	missense_variant	rs1190736	GPR101	0.458852	Benign	Benign
chrX	139551121	A	G	missense_variant	rs6048	F9	0.272655	Benign	Benign
chrX	139562070	A	G	stop_retained_variant	rs561793582	F9	0.000424767	Benign	Benign
chrX	154882114	G	A	intron_variant	rs1192249515	F8	0.000512113	Likely_benign	Likely benign
chrX	154882126	T	C	intron_variant	rs1603432269	F8	1.12616e-05	Likely_benign
chrX	154904408	G	T	synonymous_variant	rs782721473	F8	0.000418184	Benign	Conflicting classifications of pathogenicity
chrX	154928875	G	T	missense_variant	rs782615465	F8	1.63906e-05	Likely_benign
chrX	154929111	G	C	missense_variant	rs782791962	F8	4.55299e-05	Benign	Likely benign
chrX	154929926	T	G	synonymous_variant	rs1800292	F8	0.106103	Benign	Benign
chrX	154966679	C	T	missense_variant	rs781954986	F8	8.01723e-05	Uncertain_significance	Conflicting classifications of pathogenicity

## Sheet: Table S3
Category	Term	Count	%	PValue	Genes	List Total	Pop Hits	Pop Total	Fold Enrichment	Bonferroni	Benjamini	FDR
REACTOME_PATHWAY	R-HSA-1474244~Extracellular matrix organization	45	24.8619	2.44448e-35	COLGALT2, COL11A1, COL11A2, HTRA1, LTBP3, HAPLN1, COMP, ADAMTS4, ADAMTS5, ACAN, ADAMTS14, CTSK, COL10A1, EMILIN1, TIMP1, TGFB1, TGFB3, MMP1, MMP2, MMP3, ADAM10, GDF5, HSPG2, BMP7, MMP9, DCN, ASPN, BMP4, COL1A1, COL3A1, BMP2, COL2A1, MMP13, COL5A1, COL5A2, ITGA8, COL9A1, MATN1, COL9A3, COL6A6, COL9A2, MATN3, FBN1, PLEC, DDR2	142	300	11153	11.7813	1.89691e-32	1.89691e-32	1.76247e-32
REACTOME_PATHWAY	R-HSA-1474228~Degradation of the extracellular matrix	27	14.9171	1.56214e-23	COL11A1, COL11A2, HTRA1, ADAMTS4, ADAMTS5, ACAN, CTSK, COL10A1, TIMP1, MMP1, MMP2, MMP3, ADAM10, HSPG2, MMP9, DCN, COL1A1, COL3A1, COL2A1, MMP13, COL5A1, COL5A2, COL9A1, COL9A3, COL6A6, COL9A2, FBN1	142	140	11153	15.1474	1.21222e-20	6.06111e-21	5.63153e-21
REACTOME_PATHWAY	R-HSA-1442490~Collagen degradation	19	10.4972	4.79672e-20	MMP1, COL11A1, MMP2, COL11A2, MMP3, ADAM10, MMP9, COL1A1, COL3A1, COL2A1, MMP13, COL5A1, CTSK, COL5A2, COL9A1, COL10A1, COL6A6, COL9A3, COL9A2	142	64	11153	23.3172	3.72225e-17	9.70423e-18	9.01643e-18
REACTOME_PATHWAY	R-HSA-3000178~ECM proteoglycans	20	11.0497	5.00218e-20	TGFB1, TGFB3, HSPG2, DCN, ASPN, HAPLN1, COL1A1, COMP, ACAN, COL3A1, COL2A1, COL5A1, COL5A2, ITGA8, COL9A1, MATN1, COL6A6, COL9A3, COL9A2, MATN3	142	76	11153	20.669	3.88169e-17	9.70423e-18	9.01643e-18
REACTOME_PATHWAY	R-HSA-2022090~Assembly of collagen fibrils and other multimeric structures	16	8.83978	6.56271e-16	COL11A1, COL11A2, MMP3, MMP9, COL1A1, COL3A1, COL2A1, MMP13, COL5A1, COL5A2, COL9A1, COL10A1, COL6A6, COL9A3, COL9A2, PLEC	142	61	11153	20.6012	5.1692e-13	1.01853e-13	9.46343e-14
REACTOME_PATHWAY	R-HSA-1474290~Collagen formation	18	9.94475	8.21281e-16	COLGALT2, COL11A1, COL11A2, MMP3, MMP9, COL1A1, COL3A1, ADAMTS14, COL2A1, MMP13, COL5A1, COL5A2, COL9A1, COL10A1, COL6A6, COL9A3, COL9A2, PLEC	142	90	11153	15.7085	6.03073e-13	1.06219e-13	9.86906e-14
REACTOME_PATHWAY	R-HSA-1650814~Collagen biosynthesis and modifying enzymes	14	7.73481	1.705e-12	COLGALT2, COL11A1, COL11A2, COL1A1, COL3A1, ADAMTS14, COL2A1, COL5A1, COL5A2, COL9A1, COL10A1, COL6A6, COL9A3, COL9A2	142	67	11153	16.4118	1.32306e-09	1.89012e-10	1.75615e-10
REACTOME_PATHWAY	R-HSA-8948216~Collagen chain trimerization	12	6.62983	4.77651e-12	COL1A1, COL3A1, COL2A1, COL5A1, COL11A1, COL11A2, COL5A2, COL9A1, COL10A1, COL9A3, COL6A6, COL9A2	142	44	11153	21.4206	3.70657e-09	4.39453e-10	4.08307e-10
REACTOME_PATHWAY	R-HSA-6785807~Interleukin-4 and Interleukin-13 signaling	16	8.83978	5.09675e-12	TGFB1, IL4R, CXCL8, NOS2, MMP1, MMP2, MMP3, PTGS2, TNF, MMP9, IL1A, IL6, IL1B, CCL2, TIMP1, IL17A	142	108	11153	11.6359	3.95504e-09	4.39453e-10	4.08307e-10
REACTOME_PATHWAY	R-HSA-216083~Integrin cell surface interactions	14	7.73481	4.09175e-11	HSPG2, COL1A1, COMP, COL3A1, COL2A1, COL5A1, COL5A2, ITGA8, COL9A1, COL10A1, COL6A6, COL9A3, COL9A2, FBN1	142	85	11153	12.9364	3.17521e-08	3.1752e-09	2.95016e-09
REACTOME_PATHWAY	R-HSA-1280215~Cytokine Signaling in Immune system	35	19.337	8.57887e-11	IL1RN, CXCL8, TNFRSF11B, PTGS2, TNF, GHR, STAT4, CCL2, TNFSF11, CSK, TIMP1, KPNA3, TGFB1, IL4R, SMAD3, NOS2, MMP1, IL1R1, MMP2, MMP3, AIP, HLA-B, HLA-C, HLA-A, MMP9, IL1A, IL6, IL1B, IL2RA, IL2RB, HLA-DPB1, MAPT, PTPN2, IL17A, HLA-DQB1	142	775	11153	3.54707	6.6572e-08	6.052e-09	5.62306e-09
REACTOME_PATHWAY	R-HSA-2129379~Molecules associated with elastic fibres	10	5.52486	5.87791e-10	BMP4, BMP2, TGFB1, TGFB3, ITGA8, EMILIN1, LTBP3, GDF5, BMP7, FBN1	142	37	11153	21.2276	4.56125e-07	3.80105e-08	3.53164e-08
REACTOME_PATHWAY	R-HSA-3000171~Non-integrin membrane-ECM interactions	11	6.07735	2.80385e-09	COL1A1, COL3A1, COL2A1, TGFB1, COL5A1, COL11A1, COL11A2, COL5A2, COL10A1, HSPG2, DDR2	142	59	11153	14.6435	2.17579e-06	1.67368e-07	1.55506e-07
REACTOME_PATHWAY	R-HSA-1566948~Elastic fibre formation	10	5.52486	3.10772e-09	BMP4, BMP2, TGFB1, TGFB3, ITGA8, EMILIN1, LTBP3, GDF5, BMP7, FBN1	142	44	11153	17.8505	2.41159e-06	1.72257e-07	1.60048e-07
REACTOME_PATHWAY	R-HSA-6783783~Interleukin-10 signaling	10	5.52486	5.78461e-09	IL1A, IL6, IL1RN, CXCL8, IL1R1, IL1B, CCL2, TIMP1, PTGS2, TNF	142	47	11153	16.7111	4.48885e-06	2.99257e-07	2.78047e-07
REACTOME_PATHWAY	R-HSA-449147~Signaling by Interleukins	24	13.2597	1.46812e-08	IL1RN, TGFB1, IL4R, SMAD3, CXCL8, NOS2, IL1R1, MMP1, MMP2, MMP3, AIP, PTGS2, TNF, MMP9, IL1A, IL6, IL1B, IL2RA, IL2RB, STAT4, CCL2, TIMP1, PTPN2, IL17A	142	461	11153	4.08897	1.13926e-05	7.12039e-07	6.61573e-07
REACTOME_PATHWAY	R-HSA-168256~Immune System	52	28.7293	3.46298e-07	IL1RN, CXCL8, TNFAIP6, PTPN22, TNF, GHR, CTSK, TNFSF11, TIMP1, KPNA3, IL4R, MMP1, IL1R1, MMP2, MMP3, HLA-B, AIP, HLA-C, ADAM10, HLA-A, KIF22, F2, MMP9, IL1A, COL2A1, IL1B, CHI3L1, TLR10, MAPT, HLA-DQB1, CRP, CANT1, TNFRSF11B, PTGS2, MEFV, STAT4, CCL2, CSK, TGFB1, SMAD3, NOS2, BTNL2, COL1A1, COL3A1, IL6, IL2RA, IL2RB, HLA-DPB1, CD247, CALM1, PTPN2, IL17A	142	2043	11153	1.99912	0.000268691	1.58075e-05	1.46871e-05
REACTOME_PATHWAY	R-HSA-381426~Regulation of Insulin-like Growth Factor (IGF) transport and uptake by Insulin-like Growth Factor Binding Proteins (IGFBPs)	12	6.62983	4.83297e-07	BMP4, IL6, IGFBP5, MMP1, MMP2, ADAM10, TIMP1, IGF1, F2, GAS6, MATN3, FBN1	142	125	11153	7.54006	0.000374968	2.08355e-05	1.93587e-05
REACTOME_PATHWAY	R-HSA-419037~NCAM1 interactions	8	4.41989	8.28772e-07	COL3A1, COL2A1, COL5A1, COL5A2, COL9A1, COL9A3, COL6A6, COL9A2	142	42	11153	14.9604	0.000642921	3.38488e-05	3.14497e-05
REACTOME_PATHWAY	R-HSA-8874081~MET activates PTK2 signaling	7	3.8674	1.69735e-06	COL1A1, COL3A1, COL2A1, COL5A1, COL11A1, COL11A2, COL5A2	142	30	11153	18.3265	0.00131628	6.58573e-05	6.11896e-05
REACTOME_PATHWAY	R-HSA-2173789~TGF-beta receptor signaling activates SMADs	8	4.41989	1.83286e-06	SMAD2, SMAD4, TGFB1, SMAD3, TGFB3, ITGA8, LTBP3, FBN1	142	47	11153	13.3689	0.00142129	6.77287e-05	6.29284e-05
REACTOME_PATHWAY	R-HSA-1592389~Activation of Matrix Metalloproteinases	7	3.8674	3.06885e-06	MMP13, MMP1, MMP2, CTSK, MMP3, TIMP1, MMP9	142	33	11153	16.6605	0.0023786	0.000108247	0.000100575
REACTOME_PATHWAY	R-HSA-9006934~Signaling by Receptor Tyrosine Kinases	22	12.1547	3.32931e-06	COL11A1, PXN, COL11A2, ADAM10, IGF1, NGF, ESR1, MMP9, COL1A1, COL3A1, COL2A1, COL5A1, CILP, COL5A2, COL9A1, COL6A6, CSK, COL9A3, COL9A2, CALM1, FGFR3, PTPN2	142	534	11153	3.23582	0.00258021	0.000112328	0.000104366
REACTOME_PATHWAY	R-HSA-186797~Signaling by PDGF	8	4.41989	7.80436e-06	COL3A1, COL2A1, COL5A1, COL5A2, COL9A1, COL9A3, COL6A6, COL9A2	142	58	11153	10.8334	0.0060379	0.000252341	0.000234456
REACTOME_PATHWAY	R-HSA-8875878~MET promotes cell motility	7	3.8674	1.14651e-05	COL1A1, COL3A1, COL2A1, COL5A1, COL11A1, COL11A2, COL5A2	142	41	11153	13.4097	0.00885751	0.000355877	0.000330654
REACTOME_PATHWAY	R-HSA-375165~NCAM signaling for neurite out-growth	8	4.41989	1.3625e-05	COL3A1, COL2A1, COL5A1, COL5A2, COL9A1, COL9A3, COL6A6, COL9A2	142	63	11153	9.97362	0.0105174	0.000406654	0.000377831
REACTOME_PATHWAY	R-HSA-9006936~Signaling by TGFB family members	11	6.07735	3.08288e-05	SMAD2, SMAD4, BMP2, TGFB1, SMAD3, TGFB3, ITGA8, TIMP1, LTBP3, TNRC6B, FBN1	142	158	11153	5.46813	0.0236396	0.000886042	0.000823242
REACTOME_PATHWAY	R-HSA-114608~Platelet degranulation	10	5.52486	3.62171e-05	SELP, CLEC3B, F8, TGFB1, TGFB3, TMSB4X, TIMP1, IGF1, CALM1, GAS6	142	129	11153	6.08855	0.0277137	0.00100373	0.000932591
REACTOME_PATHWAY	R-HSA-76005~Response to elevated platelet cytosolic Ca2+	10	5.52486	4.88789e-05	SELP, CLEC3B, F8, TGFB1, TGFB3, TMSB4X, TIMP1, IGF1, CALM1, GAS6	142	134	11153	5.86136	0.0372206	0.00130793	0.00121523
REACTOME_PATHWAY	R-HSA-6806834~Signaling by MET	8	4.41989	6.03394e-05	COL1A1, COL3A1, COL2A1, COL5A1, COL11A1, COL11A2, COL5A2, PTPN2	142	79	11153	7.95365	0.0457454	0.00152213	0.00141424
REACTOME_PATHWAY	R-HSA-8878166~Transcriptional regulation by RUNX2	9	4.97238	6.08066e-05	COL1A1, SMAD4, BMP2, MMP13, UCMA, BGLAP, SOX9, ESR1, RUNX2	142	107	11153	6.60636	0.0460913	0.00152213	0.00141424
REACTOME_PATHWAY	R-HSA-3304349~Loss of Function of SMAD2/3 in Cancer	4	2.20994	6.6709e-05	SMAD2, SMAD4, TGFB1, SMAD3	142	7	11153	44.8813	0.0504508	0.00161769	0.00150304
REACTOME_PATHWAY	R-HSA-162582~Signal Transduction	54	29.8343	8.79625e-05	CXCL8, TNF, MCF2L, SOX9, TIMP1, SOX4, NCOA3, MMP2, MMP3, OMG, ADAM10, WNT9A, NGF, F2, MMP9, COL2A1, ALDH1A2, KCTD13, ITGA8, COL6A6, COL11A1, COL11A2, PXN, LTBP3, DDRGK1, CCL2, CSK, SMAD2, SMAD4, TGFB1, SMAD3, TGFB3, WWP2, IGF1, ESR1, COL1A1, COL3A1, BMP2, IL6, COL5A1, CILP, IL2RA, COL5A2, IL2RB, COL9A1, NF1, GNAS, COL9A3, COL9A2, CALM1, FGFR3, PTPN2, FBN1, TNRC6B	142	2597	11153	1.63315	0.0659842	0.00206845	0.00192185
REACTOME_PATHWAY	R-HSA-3304351~Signaling by TGF-beta Receptor Complex in Cancer	4	2.20994	0.000105746	SMAD2, SMAD4, TGFB1, SMAD3	142	8	11153	39.2711	0.0787862	0.00241349	0.00224243
REACTOME_PATHWAY	R-HSA-76002~Platelet activation, signaling and aggregation	13	7.18232	0.000123378	TGFB1, TGFB3, IGF1, F2, SELP, COL1A1, F8, CLEC3B, TMSB4X, CSK, TIMP1, CALM1, GAS6	142	263	11153	3.88232	0.0913064	0.00273547	0.00254159
REACTOME_PATHWAY	R-HSA-202427~Phosphorylation of CD3 and TCR zeta chains	5	2.76243	0.00015001	HLA-DPB1, CSK, PTPN22, CD247, HLA-DQB1	142	22	11153	17.8505	0.109896	0.00323356	0.00300438
REACTOME_PATHWAY	R-HSA-159763~Transport of gamma-carboxylated protein precursors from the endoplasmic reticulum to the Golgi apparatus	4	2.20994	0.000157151	F9, BGLAP, F2, GAS6	142	9	11153	34.9077	0.114815	0.00329591	0.00306231
REACTOME_PATHWAY	R-HSA-170834~Signaling by TGF-beta Receptor Complex	8	4.41989	0.000182051	SMAD2, SMAD4, TGFB1, SMAD3, TGFB3, ITGA8, LTBP3, FBN1	142	94	11153	6.68445	0.131758	0.00371768	0.00345419
REACTOME_PATHWAY	R-HSA-159740~Gamma-carboxylation of protein precursors	4	2.20994	0.000222424	F9, BGLAP, F2, GAS6	142	10	11153	31.4169	0.158543	0.00431502	0.00400919
REACTOME_PATHWAY	R-HSA-159782~Removal of aminoterminal propeptides from gamma-carboxylated proteins	4	2.20994	0.000222424	F9, BGLAP, F2, GAS6	142	10	11153	31.4169	0.158543	0.00431502	0.00400919
REACTOME_PATHWAY	R-HSA-159854~Gamma-carboxylation, transport, and amino-terminal cleavage of proteins	4	2.20994	0.000303005	F9, BGLAP, F2, GAS6	142	11	11153	28.5608	0.209561	0.00573492	0.00532845
REACTOME_PATHWAY	R-HSA-3000170~Syndecan interactions	5	2.76243	0.000342675	COL1A1, COL3A1, TGFB1, COL5A1, COL5A2	142	27	11153	14.5449	0.233531	0.00633133	0.00588259
REACTOME_PATHWAY	R-HSA-8957275~Post-translational protein phosphorylation	8	4.41989	0.000428315	BMP4, IL6, IGFBP5, ADAM10, TIMP1, GAS6, MATN3, FBN1	142	108	11153	5.81794	0.282831	0.00772958	0.00718174
REACTOME_PATHWAY	R-HSA-3311021~SMAD4 MH2 Domain Mutants in Cancer	3	1.65746	0.000472172	SMAD2, SMAD4, SMAD3	142	3	11153	78.5423	0.306838	0.00796533	0.00740078
REACTOME_PATHWAY	R-HSA-3304347~Loss of Function of SMAD4 in Cancer	3	1.65746	0.000472172	SMAD2, SMAD4, SMAD3	142	3	11153	78.5423	0.306838	0.00796533	0.00740078
REACTOME_PATHWAY	R-HSA-3315487~SMAD2/3 MH2 Domain Mutants in Cancer	3	1.65746	0.000472172	SMAD2, SMAD4, SMAD3	142	3	11153	78.5423	0.306838	0.00796533	0.00740078
REACTOME_PATHWAY	R-HSA-8941326~RUNX2 regulates bone development	5	2.76243	0.000668594	COL1A1, SMAD4, UCMA, BGLAP, RUNX2	142	32	11153	12.2722	0.404886	0.0110389	0.0102565
REACTOME_PATHWAY	R-HSA-109582~Hemostasis	19	10.4972	0.000834291	TGFB1, NOS2, TGFB3, MMP1, IGF1, KIF22, F2, SELP, SPN, COL1A1, F8, CLEC3B, F9, TMSB4X, GNAS, CSK, TIMP1, CALM1, GAS6	142	622	11153	2.3992	0.476742	0.0134877	0.0125317
REACTOME_PATHWAY	R-HSA-1643685~Disease	39	21.547	0.000888863	SLC26A2, SLC40A1, MEFV, ADAMTS4, ADAMTS5, ACAN, ADAMTS14, LMNA, CSK, KPNA3, SMAD2, SMAD4, TGFB1, CPSF6, SMAD3, NOS2, IL1R1, HLA-B, HLA-C, ADAM10, HLA-A, F2, HSPG2, ESR1, DCN, COL1A1, IL1A, F8, IL6, F9, IL1B, GNAS, NF1, STT3A, TLR10, CD247, CALM1, FGFR3, IL17A	142	1821	11153	1.68212	0.498456	0.0140767	0.013079
REACTOME_PATHWAY	R-HSA-9754189~Germ layer formation at gastrulation	4	2.20994	0.00118118	SMAD2, BMP4, SMAD4, SMAD3	142	17	11153	18.4805	0.60034	0.018332	0.0170327
REACTOME_PATHWAY	R-HSA-9671793~Diseases of hemostasis	4	2.20994	0.00165234	COL1A1, F8, F9, F2	142	19	11153	16.5352	0.722871	0.0246579	0.0229103
REACTOME_PATHWAY	R-HSA-202430~Translocation of ZAP-70 to Immunological synapse	4	2.20994	0.00165234	HLA-DPB1, PTPN22, CD247, HLA-DQB1	142	19	11153	16.5352	0.722871	0.0246579	0.0229103
REACTOME_PATHWAY	R-HSA-3656532~TGFBR1 KD Mutants in Cancer	3	1.65746	0.0023026	SMAD2, TGFB1, SMAD3	142	6	11153	39.2711	0.832853	0.0330892	0.030744
REACTOME_PATHWAY	R-HSA-3304356~SMAD2/3 Phosphorylation Motif Mutants in Cancer	3	1.65746	0.0023026	SMAD2, TGFB1, SMAD3	142	6	11153	39.2711	0.832853	0.0330892	0.030744
REACTOME_PATHWAY	R-HSA-9839373~Signaling by TGFBR3	5	2.76243	0.00264667	SMAD4, TGFB1, SMAD3, TIMP1, TNRC6B	142	46	11153	8.5372	0.872104	0.0373421	0.0346954
REACTOME_PATHWAY	R-HSA-389948~PD-1 signaling	4	2.20994	0.00291041	HLA-DPB1, CSK, CD247, HLA-DQB1	142	23	11153	13.6595	0.895834	0.0403299	0.0374715
REACTOME_PATHWAY	R-HSA-3656534~Loss of Function of TGFBR1 in Cancer	3	1.65746	0.00319696	SMAD2, TGFB1, SMAD3	142	7	11153	33.661	0.916659	0.0420481	0.0390679
REACTOME_PATHWAY	R-HSA-9662001~Defective factor VIII causes hemophilia A	3	1.65746	0.00319696	F8, F9, F2	142	7	11153	33.661	0.916659	0.0420481	0.0390679
REACTOME_PATHWAY	R-HSA-8941855~RUNX3 regulates CDKN1A transcription	3	1.65746	0.00319696	SMAD4, TGFB1, SMAD3	142	7	11153	33.661	0.916659	0.0420481	0.0390679
REACTOME_PATHWAY	R-HSA-8940973~RUNX2 regulates osteoblast differentiation	4	2.20994	0.00329565	COL1A1, UCMA, BGLAP, RUNX2	142	24	11153	13.0904	0.922823	0.0426238	0.0396028
REACTOME_PATHWAY	R-HSA-198933~Immunoregulatory interactions between a Lymphoid and a non-Lymphoid cell	7	3.8674	0.00677989	COL1A1, COL3A1, COL2A1, HLA-B, HLA-C, HLA-A, CD247	142	133	11153	4.1338	0.994903	0.0862492	0.0801361
REACTOME_PATHWAY	R-HSA-163841~Gamma carboxylation, hypusinylation, hydroxylation, and arylsulfatase activation	5	2.76243	0.00731759	F8, F9, BGLAP, F2, GAS6	142	61	11153	6.43789	0.996652	0.0902924	0.0838928
REACTOME_PATHWAY	R-HSA-877300~Interferon gamma signaling	6	3.31492	0.00733044	HLA-B, HLA-DPB1, HLA-C, HLA-A, PTPN2, HLA-DQB1	142	96	11153	4.90889	0.996685	0.0902924	0.0838928
REACTOME_PATHWAY	R-HSA-202733~Cell surface interactions at the vascular wall	7	3.8674	0.00780171	SELP, SPN, COL1A1, TGFB1, MMP1, F2, GAS6	142	137	11153	4.01311	0.997707	0.0945958	0.0878912
REACTOME_PATHWAY	R-HSA-1236977~Endosomal/Vacuolar pathway	3	1.65746	0.00809985	HLA-B, HLA-C, HLA-A	142	11	11153	21.4206	0.998184	0.0966998	0.0898461
REACTOME_PATHWAY	R-HSA-3781865~Diseases of glycosylation	7	3.8674	0.00985892	ADAMTS4, ACAN, ADAMTS5, SLC26A2, ADAMTS14, HSPG2, DCN	142	144	11153	3.81803	0.999542	0.115917	0.107701
REACTOME_PATHWAY	R-HSA-9843745~Adipogenesis	6	3.31492	0.0123083	SMAD4, TGFB1, NCOA3, DIO2, TNF, BMP7	142	109	11153	4.32343	0.999933	0.142556	0.132452
REACTOME_PATHWAY	R-HSA-3560782~Diseases associated with glycosaminoglycan metabolism	4	2.20994	0.0148521	ACAN, SLC26A2, HSPG2, DCN	142	41	11153	7.66266	0.999991	0.165853	0.154098
REACTOME_PATHWAY	R-HSA-9823730~Formation of definitive endoderm	3	1.65746	0.0149609	SMAD2, SMAD4, SMAD3	142	15	11153	15.7085	0.999992	0.165853	0.154098
REACTOME_PATHWAY	R-HSA-2162123~Synthesis of Prostaglandins (PG) and Thromboxanes (TX)	3	1.65746	0.0149609	HPGD, PTGS2, PTGS1	142	15	11153	15.7085	0.999992	0.165853	0.154098
REACTOME_PATHWAY	R-HSA-9009391~Extra-nuclear estrogen signaling	5	2.76243	0.0162636	MMP2, MMP3, CALM1, ESR1, MMP9	142	77	11153	5.10015	0.999997	0.177754	0.165156
REACTOME_PATHWAY	R-HSA-9651496~Defects of contact activation system (CAS) and kallikrein/kinin system (KKS)	3	1.65746	0.016958	F8, F9, F2	142	16	11153	14.7267	0.999998	0.181398	0.168541
REACTOME_PATHWAY	R-HSA-9658195~Leishmania infection	7	3.8674	0.0172982	IL1A, IL6, IL1B, GNAS, CD247, CALM1, MEFV	142	163	11153	3.37298	0.999999	0.181398	0.168541
REACTOME_PATHWAY	R-HSA-9824443~Parasitic Infection Pathways	7	3.8674	0.0172982	IL1A, IL6, IL1B, GNAS, CD247, CALM1, MEFV	142	163	11153	3.37298	0.999999	0.181398	0.168541
REACTOME_PATHWAY	R-HSA-9617828~FOXO-mediated transcription of cell cycle genes	3	1.65746	0.0190615	SMAD2, SMAD4, SMAD3	142	17	11153	13.8604	1	0.194628	0.180834
REACTOME_PATHWAY	R-HSA-1502540~Signaling by Activin	3	1.65746	0.0190615	SMAD2, SMAD4, SMAD3	142	17	11153	13.8604	1	0.194628	0.180834
REACTOME_PATHWAY	R-HSA-5663202~Diseases of signal transduction by growth factor receptors and second messengers	12	6.62983	0.0277218	SMAD2, SMAD4, TGFB1, SMAD3, CPSF6, LMNA, NF1, ADAM10, CSK, CALM1, ESR1, FGFR3	142	451	11153	2.08982	1	0.279378	0.259577
REACTOME_PATHWAY	R-HSA-1181150~Signaling by NODAL	3	1.65746	0.0310755	SMAD2, SMAD4, SMAD3	142	22	11153	10.7103	1	0.309162	0.287249
REACTOME_PATHWAY	R-HSA-446652~Interleukin-1 family signaling	6	3.31492	0.032322	IL1A, IL1RN, SMAD3, IL1R1, IL1B, PTPN2	142	140	11153	3.3661	1	0.317492	0.294989
REACTOME_PATHWAY	R-HSA-140837~Intrinsic Pathway of Fibrin Clot Formation	3	1.65746	0.0337579	F8, F9, F2	142	23	11153	10.2446	1	0.327452	0.304243
REACTOME_PATHWAY	R-HSA-9673202~Defective F9 variant does not activate FX	2	1.10497	0.0374529	F8, F9	142	3	11153	52.3615	1	0.345993	0.32147
REACTOME_PATHWAY	R-HSA-9672383~Defective factor IX causes thrombophilia	2	1.10497	0.0374529	F8, F9	142	3	11153	52.3615	1	0.345993	0.32147
REACTOME_PATHWAY	R-HSA-9672396~Defective cofactor function of FVIIIa variant	2	1.10497	0.0374529	F8, F9	142	3	11153	52.3615	1	0.345993	0.32147
REACTOME_PATHWAY	R-HSA-9672391~Defective F8 cleavage by thrombin	2	1.10497	0.0374529	F8, F2	142	3	11153	52.3615	1	0.345993	0.32147
REACTOME_PATHWAY	R-HSA-9839394~TGFBR3 expression	3	1.65746	0.0393808	SMAD4, SMAD3, TNRC6B	142	25	11153	9.42507	1	0.359524	0.334042
REACTOME_PATHWAY	R-HSA-9660826~Purinergic signaling in leishmaniasis infection	3	1.65746	0.0423162	IL1A, IL1B, MEFV	142	26	11153	9.06257	1	0.373152	0.346704
REACTOME_PATHWAY	R-HSA-9664424~Cell recruitment (pro-inflammatory response)	3	1.65746	0.0423162	IL1A, IL1B, MEFV	142	26	11153	9.06257	1	0.373152	0.346704
REACTOME_PATHWAY	R-HSA-2173788~Downregulation of TGF-beta receptor signaling	3	1.65746	0.0423162	SMAD2, TGFB1, SMAD3	142	26	11153	9.06257	1	0.373152	0.346704
REACTOME_PATHWAY	R-HSA-5683057~MAPK family signaling cascades	9	4.97238	0.04435	IL6, IL2RA, NCOA3, IL2RB, NF1, CSK, CALM1, FGFR3, TNRC6B	142	312	11153	2.26564	1	0.386692	0.359285
REACTOME_PATHWAY	R-HSA-202403~TCR signaling	5	2.76243	0.0465785	HLA-DPB1, CSK, PTPN22, CD247, HLA-DQB1	142	107	11153	3.6702	1	0.40161	0.373145

## Sheet: Table S4
Variant #	HGVS ID	Gene Name	Read depth (DP)	Variant Quality score (QUAL)	Allele depth (ref, alt) (AD)
1	NC_000001.11:g.102998344C>T	COL11A1	136	1094.64	77, 59
2	NC_000012.12:g.120214832A>G	PXN	70	618.64	37, 33
3	NC_000013.11:g.51946430A>T	ATP7B	132	1170.64	70, 62
4	NC_000017.11:g.72122841G>A (rs777760556)	SOX9	155	1587.64	79, 76
5	NC_000010.11:g.122461974G>T	HTRA1	184	1565.65	107, 77
6	NC_000002.12:g.203495273C>T (rs763483457)	RAPH1	186	1578.64	105, 81
7	NC_000008.11:g.143931977C>G (rs553811387)	PLEC	107	1093.64	51, 54
